# Supplementary material for: Genome-Wide DNA Methylation in Mixed Ancestry Individuals with Diabetes and Prediabetes from South Africa
Source: Int J Endocrinol. 2016 Jul 31;2016:3172093. doi: 10.1155/2016/3172093 (PMC4983374; doi:10.1155/2016/3172093)
Supplement: Supplementary file 1 — Supplementary Tables 1 to 24 is an excel file. S1 to S6 shows DMRs within gene promoters in prediabetes vs controls (S1 and S2); diabetes vs controls (S3 and S4); diabetes vs prediabetes (S5 and S6). BP1 to BP6 depicts Gene Ontology (GO) classification of biological processes in diabetes vs controls (BP1 and BP2); diabetes vs prediabetes (BP3 and BP4); prediabetes vs controls (BP5 and BP6). CP1 to CP6 shows GO classification of cellular process in diabetes vs controls (CP1 and CP2); diabetes vs prediabetes (CP3 and CP4); prediabetes vs controls (CP5 and CP6). MF1 to MF6 shows GO classification of molecular function in diabetes vs controls (MF1 and MF2); diabetes vs prediabetes (MF3 and MF4); prediabetes vs controls (MF5 and MF6). [file 3172093.f1.xls]

## Sheet: S1_Pre-DM Vs Control (hyper)
Prediabetes Vs Control hypermethylated DMRs in promoter (by MANorm) Column A: GeneName, the name of DMR-associated gene. Column B: DMR_To_TSS, the distance of DMR (middle position) to TSS. Positive value indicates downstream, and negative value indicates upstream. Column C: DMR_Locus, the genomic locus of DMR. Column D: DMR_Length, the length of DMR. Column E ~ F: RawTagCount, raw tag count of ea…
GeneName	DMR_To_TSS	DMR_Locus	DMR_Length	RawTagCount_Pre-diabetes	RawTagCount_Control	M_value_rescaled	A_value_rescaled	"-log10(p-value)"	Genechrom	GeneTSS	GeneTTS	Strand	Accession	ProteinName	ProteinID	GeneID	mRNADescription
CRH	1915	chr8:67088691-67089171	480	35	1	4.5413	3.2706	12.6395	chr8	67090846	67088611	-	NM_000756	corticoliberin preproprotein	NP_000747	1392	Corticotropin-releasing hormone is secreted by the paraventricular nucleus (PVN) of the hypothalamus in response to stress. Marked reduction in this protein has been observed in association with Alzheimer disease and autosomal recessive hypothalamic corticotropin deficiency has multiple and potentially fatal metabolic consequences including hypoglycemia and hepatitis. In addition to production in…
LBH	1686	chr2:30455842-30456322	480	27	1	4.1589	3.0794	9.4426	chr2	30454396	30482899	+	NM_030915	protein LBH	NP_112177	81606
GHRLOS2	-1887	chr3:10323829-10324602	773	45	3	3.9143	3.9571	14.0279	chr3	10326102	10327430	+	NR_026829			84657
LOC100506025	947	chr7:16250817-16251297	480	22	1	3.8596	2.9298	7.4278	chr7	16250110	16310229	+	NR_038947			100506025
TP53BP1	848	chr15:43801619-43802099	480	30	2	3.7288	3.4494	9.4523	chr15	43802707	43699411	-	NM_005657	tumor suppressor p53-binding protein 1 isoform 3	NP_005648	7158
LOC100505812	-1533	chr19:48757158-48757638	480	30	2	3.7288	3.4494	9.4523	chr19	48758931	48761450	+	NR_040599			100505812
MID1	1844	chrX:10542873-10543353	480	38	3	3.6631	3.8315	11.5248	chrX	10544957	10413349	-	NM_001193277	midline-1 isoform 1	NP_001180206	4281	The protein encoded by this gene is a member of the tripartite motif (TRIM) family, also known as the 'RING-B box-coiled coil' (RBCC) subgroup of RING finger proteins. The TRIM motif includes three zinc-binding domains, a RING, a B-box type 1 and a B-box type 2, and a coiled-coil region. This protein forms homodimers which associate with microtubules in the cytoplasm. The protein is likely involv…
LOC100128787	-1609	chr1:101113922-101114417	495	44	4	3.5589	4.1014	12.796	chr1	101112560	101092605	-	NR_038914			100128787
ZNF732	1967	chr4:287737-288217	480	35	3	3.5413	3.7706	10.424	chr4	289944	264463	-	NM_001137608	zinc finger protein 732	NP_001131080	654254
MOSPD2	1875	chrX:14893161-14893641	480	34	3	3.4984	3.7492	9.8768	chrX	14891526	14939459	+	NM_152581	motile sperm domain-containing protein 2 isoform 1	NP_689794	158747
HSPB8	1234	chr12:119617582-119618075	493	41	4	3.4539	4.0489	11.7097	chr12	119616594	119632551	+	NM_014365	heat shock protein beta-8	NP_055180	26353	The protein encoded by this gene belongs to the superfamily of small heat-shock proteins containing a conservative alpha-crystallin domain at the C-terminal part of the molecule. The expression of this gene in induced by estrogen in estrogen receptor-positive breast cancer cells, and this protein also functions as a chaperone in association with Bag3, a stimulator of macroautophagy. Thus, this ge…
OR10J5	899	chr1:159504658-159505138	480	31	3	3.3621	3.681	8.7899	chr1	159505797	159504867	-	NM_001004469	olfactory receptor 10J5	NP_001004469	127385	Olfactory receptors interact with odorant molecules in the nose, to initiate a neuronal response that triggers the perception of a smell. The olfactory receptor proteins are members of a large family of G-protein-coupled receptors (GPCR) arising from single coding-exon genes. Olfactory receptors share a 7-transmembrane domain structure with many neurotransmitter and hormone receptors and are resp…
ZNF763	1736	chr19:12077347-12077862	515	51	6	3.2935	4.4541	13.7982	chr19	12075868	12091198	+	NM_001012753	zinc finger protein 763	NP_001012771	284390
TIFAB	1386	chr5:134786463-134786943	480	29	3	3.2639	3.6319	7.9823	chr5	134788089	134784557	-	NM_001099221	TRAF-interacting protein with FHA domain-containing protein B	NP_001092691	497189	TIFAB associates with TIFA (MIM 609028) and inhibits TIFA-mediated activation of NF-kappa-B (NFKB1; MIM 164011) (Matsumura et al., 2004 [PubMed 15047173]).[supplied by OMIM, Mar 2009].
FCRL4	-599	chr1:157568229-157568709	480	29	3	3.2639	3.6319	7.9823	chr1	157567870	157543538	-	NM_031282	Fc receptor-like protein 4 precursor	NP_112572	83417	This gene encodes a member of the immunoglobulin receptor superfamily and is one of several Fc receptor-like glycoproteins clustered on the long arm of chromosome 1. The encoded protein has four extracellular C2-type immunoglobulin domains, a transmembrane domain and a cytoplasmic domain that contains three immune-receptor tyrosine-based inhibitory motifs. This protein may play a role in the func…
ADAR	-1944	chr1:154582428-154582908	480	29	3	3.2639	3.6319	7.9823	chr1	154580724	154554533	-	NM_015841	double-stranded RNA-specific adenosine deaminase isoform c	NP_056656	103	This gene encodes the enzyme responsible for RNA editing by site-specific deamination of adenosines. This enzyme destabilizes double-stranded RNA through conversion of adenosine to inosine. Mutations in this gene have been associated with dyschromatosis symmetrica hereditaria. Alternative splicing results in multiple transcript variants. [provided by RefSeq, Jul 2010].
NDUFA5	-567	chr7:123198274-123198777	503	43	5	3.2617	4.2158	11.6811	chr7	123197958	123181082	-	NM_005000	NADH dehydrogenase [ubiquinone] 1 alpha subcomplex subunit 5	NP_004991	4698	The human NDUFA5 gene codes for the B13 subunit of complex I of the respiratory chain, which transfers electrons from NADH to ubiquinone. The high degree of conservation of NDUFA5 extending to plants and fungi indicates its functional significance in the enzyme complex. The protein localizes to the inner mitochondrial membrane as part of the 7 component-containing, water soluble 'iron-sulfur prot…
KCNIP4	484	chr4:21545500-21546091	591	47	6	3.1717	4.3932	12.2189	chr4	21546279	20730238	-	NM_001035004	Kv channel-interacting protein 4 isoform 3	NP_001030176	80333	This gene encodes a member of the family of voltage-gated potassium (Kv) channel-interacting proteins (KCNIPs), which belong to the recoverin branch of the EF-hand superfamily. Members of the KCNIP family are small calcium binding proteins. They all have EF-hand-like domains, and differ from each other in the N-terminus. They are integral subunit components of native Kv4 channel complexes. They m…
SNORD116-19	-186	chr15:25328307-25328787	480	32	4	3.087	3.8654	8.2463	chr15	25328733	25328827	+	NR_001290			727708
SNORD116-17	-186	chr15:25328307-25328787	480	32	4	3.087	3.8654	8.2463	chr15	25328733	25328827	+	NR_003332			100033429
LOC283710	-1452	chr15:31524199-31524806	607	38	5	3.0781	4.124	9.8411	chr15	31523050	31514970	-	NM_001243538	hypothetical protein LOC283710	NP_001230467	283710
INSL5	-1678	chr1:67268380-67268860	480	19	2	3.0619	3.1159	5.3326	chr1	67266942	67263423	-	NM_005478	insulin-like peptide INSL5 precursor	NP_005469	10022	The protein encoded by this gene contains a classical signature of the insulin superfamily and is highly similar to relaxin 3 (RLN3/INSL7). [provided by RefSeq, Jul 2008].
IPO5	-1722	chr13:98603860-98604552	692	58	9	2.971	4.8075	13.924	chr13	98605928	98676550	+	NM_002271	importin-5	NP_002262	3843	Nucleocytoplasmic transport, a signal- and energy-dependent process, takes place through nuclear pore complexes embedded in the nuclear envelope. The import of proteins containing a nuclear localization signal (NLS) requires the NLS import receptor, a heterodimer of importin alpha and beta subunits also known as karyopherins. Importin alpha binds the NLS-containing cargo in the cytoplasm and impo…
GPR52	1084	chr1:174418055-174418535	480	35	5	2.9563	4.0631	8.8059	chr1	174417211	174418683	+	NM_005684	probable G-protein coupled receptor 52	NP_005675	9293	Members of the G protein-coupled receptor (GPR) family play important roles in signal transduction from the external environment to the inside of the cell.[supplied by OMIM, Jul 2002].
GGT1	641	chr22:25004026-25004506	480	46	7	2.947	4.4735	11.2355	chr22	25003625	25024972	+	NM_001032365	gamma-glutamyltranspeptidase 1 precursor	NP_001027537	2678	The enzyme encoded by this gene catalyzes the transfer of the glutamyl moiety of glutathione to a variety of amino acids and dipeptide acceptors. The enzyme is composed of a heavy chain and a light chain, which are derived from a single precursor protein, and is present in tissues involved in absorption and secretion. This enzyme is a member of the gamma-glutamyltransferase protein family, of whi…
ZIC1	1240	chr3:147128180-147128660	480	34	5	2.9135	4.0417	8.2934	chr3	147127180	147134506	+	NM_003412	zinc finger protein ZIC 1	NP_003403	7545	This gene encodes a member of the ZIC family of C2H2-type zinc finger proteins. Members of this family are important during development. Aberrant expression of this gene is seen in medulloblastoma, a childhood brain tumor. This gene is closely linked to the gene encoding zinc finger protein of the cerebellum 4, a related family member on chromosome 3. This gene encodes a transcription factor that…
TNFRSF19	606	chr13:24153864-24154344	480	34	5	2.9135	4.0417	8.2934	chr13	24153498	24243412	+	NM_018647	tumor necrosis factor receptor superfamily member 19 isoform 1 precursor	NP_061117	55504	The protein encoded by this gene is a member of the TNF-receptor superfamily. This receptor is highly expressed during embryonic development. It has been shown to interact with TRAF family members, and to activate JNK signaling pathway when overexpressed in cells. This receptor is capable of inducing apoptosis by a caspase-independent mechanism, and it is thought to play an essential role in embr…
SPOCK3	1128	chr4:168154183-168154715	532	39	6	2.8942	4.2545	9.383	chr4	168155577	167654535	-	NM_001204353	testican-3 isoform 4	NP_001191282	50859	Proteoglycans, which consist of a core protein and covalently linked glycosaminoglycans, are components of the extracellular matrix. SPOCK3 encodes a member of a novel Ca(2+)-binding proteoglycan family.[supplied by OMIM, Apr 2004].
CTAGE5	428	chr14:39734663-39735143	480	28	4	2.8903	3.7671	6.9508	chr14	39734475	39820397	+	NM_203354	cutaneous T-cell lymphoma-associated antigen 5 isoform 2	NP_976229	4253
SEC16B	1790	chr1:177937020-177937500	480	33	5	2.8693	4.0196	8.0387	chr1	177939050	177898241	-	NM_033127	protein transport protein Sec16B	NP_149118	89866	SEC16B is a mammalian homolog of S. cerevisiae Sec16 that is required for organization of transitional endoplasmic reticulum (ER) sites and protein export (Bhattacharyya and Glick, 2007 [PubMed 17192411]).[supplied by OMIM, Jun 2009]. Publication Note: This RefSeq record includes a subset of the publications that are available for this gene. Please see the Gene record to access additional publica…
MIR4657	-1315	chr7:44922474-44922954	480	22	3	2.8596	3.4298	5.6101	chr7	44921399	44921346	-	NR_039801			100616393	microRNAs (miRNAs) are short (20-24 nt) non-coding RNAs that are involved in post-transcriptional regulation of gene expression in multicellular organisms by affecting both the stability and translation of mRNAs. miRNAs are transcribed by RNA polymerase II as part of capped and polyadenylated primary transcripts (pri-miRNAs) that can be either protein-coding or non-coding. The primary transcript …
GAS2L3	-1687	chr12:100965561-100966041	480	37	6	2.8162	4.2155	8.6262	chr12	100967488	101018685	+	NM_174942	GAS2-like protein 3	NP_777602	283431
ZMAT1	951	chrX:101185765-101186412	647	42	7	2.8116	4.4058	9.7217	chrX	101187039	101137259	-	NM_001011657	zinc finger matrin-type protein 1 isoform 1	NP_001011657	84460	This gene encodes a zinc finger protein. Alternatively spliced transcript variants have been described. [provided by RefSeq, Jul 2010].
CLNS1A	1726	chr11:77346860-77347390	530	52	9	2.8079	4.7259	11.9149	chr11	77348851	77327195	-	NM_001293	methylosome subunit pICln	NP_001284	1207	This gene encodes a protein that functions in multiple regulatory pathways. The encoded protein complexes with numerous cytosolic proteins and performs diverse functions including regulation of small nuclear ribonucleoprotein biosynthesis, platelet activation and cytoskeletal organization. The protein is also found associated with the plasma membrane where it functions as a chloride current regul…
MIR421	1450	chrX:73436575-73437117	542	41	7	2.7758	4.3879	9.4722	chrX	73438296	73438211	-	NR_030398			693122	microRNAs (miRNAs) are short (20-24 nt) non-coding RNAs that are involved in post-transcriptional regulation of gene expression in multicellular organisms by affecting both the stability and translation of mRNAs. miRNAs are transcribed by RNA polymerase II as part of capped and polyadenylated primary transcripts (pri-miRNAs) that can be either protein-coding or non-coding. The primary transcript …
RPL4	465	chr15:66796451-66797005	554	50	9	2.7493	4.6966	11.1727	chr15	66797193	66791652	-	NM_000968	60S ribosomal protein L4	NP_000959	6124	Ribosomes, the organelles that catalyze protein synthesis, consist of a small 40S subunit and a large 60S subunit. Together these subunits are composed of 4 RNA species and approximately 80 structurally distinct proteins. This gene encodes a ribosomal protein that is a component of the 60S subunit. The protein belongs to the L4E family of ribosomal proteins. It is located in the cytoplasm. As is …
EYA1	560	chr8:72268179-72268659	480	35	6	2.7339	4.1743	8.1265	chr8	72268979	72109667	-	NM_172059	eyes absent homolog 1 isoform c	NP_742056	2138	This gene encodes a member of the eyes absent (EYA) family of proteins. The encoded protein may play a role in the developing kidney, branchial arches, eye, and ear. Mutations of this gene have been associated with branchiootorenal dysplasia syndrome, branchiootic syndrome, and sporadic cases of congenital cataracts and ocular anterior segment anomalies. A similar protein in mice can act as a tra…
ELK4	-1321	chr1:205603081-205603561	480	35	6	2.7339	4.1743	8.1265	chr1	205602000	205588395	-	NM_021795	ETS domain-containing protein Elk-4 isoform b	NP_068567	2005	This gene is a member of the Ets family of transcription factors and of the ternary complex factor (TCF) subfamily. Proteins of the TCF subfamily form a ternary complex by binding to the the serum response factor and the serum reponse element in the promoter of the c-fos proto-oncogene. The protein encoded by this gene is phosphorylated by the kinases, MAPK1 and MAPK8. Several transcript variants…
GRIK1-AS1	1621	chr21:31121874-31122354	480	25	4	2.7242	3.684	5.9349	chr21	31120493	31136325	+	NR_027021			642976
SEL1L	-542	chr14:82000507-82000987	480	34	6	2.6911	4.1529	7.631	chr14	82000205	81939238	-	NM_005065	protein sel-1 homolog 1 precursor	NP_005056	6400
GPR137C	1884	chr14:53021509-53021989	480	29	5	2.6789	3.9244	6.5328	chr14	53019865	53104431	+	NM_001099652	integral membrane protein GPR137C	NP_001093122	283554
MIR218-1	-167	chr4:20529490-20529970	480	24	4	2.6645	3.6542	5.6843	chr4	20529897	20530007	+	NR_029631			407000	microRNAs (miRNAs) are short (20-24 nt) non-coding RNAs that are involved in post-transcriptional regulation of gene expression in multicellular organisms by affecting both the stability and translation of mRNAs. miRNAs are transcribed by RNA polymerase II as part of capped and polyadenylated primary transcripts (pri-miRNAs) that can be either protein-coding or non-coding. The primary transcript …
ZDHHC20	1972	chr13:22031296-22031776	480	19	3	2.6469	3.3235	4.5893	chr13	22033508	21946709	-	NM_153251	probable palmitoyltransferase ZDHHC20	NP_694983	253832
FBXO22-AS1	-461	chr15:76225692-76226172	480	28	5	2.6273	3.8986	6.2861	chr15	76225471	76225023	-	NR_003136			692224
HTR4	-1017	chr5:148034391-148035121	730	41	8	2.6059	4.4729	8.8521	chr5	148033739	147861114	-	NM_000870	5-hydroxytryptamine receptor 4 isoform b	NP_000861	3360	This gene is a member of the family of serotonin receptors, which are G protein coupled receptors that stimulate cAMP production in response to serotonin (5-hydroxytryptamine). The gene product is a glycosylated transmembrane protein that functions in both the peripheral and central nervous system to modulate the release of various neurotransmitters. Multiple transcript variants encoding proteins…
ZMYND11	1294	chr10:182477-182957	480	32	6	2.6015	4.1081	6.8963	chr10	181423	300577	+	NM_001202464	zinc finger MYND domain-containing protein 11 isoform c	NP_001189393	10771	The protein encoded by this gene was first identified by its ability to bind the adenovirus E1A protein. The protein localizes to the nucleus. It functions as a transcriptional repressor, and expression of E1A inhibits this repression. Alternatively spliced transcript variants encoding different isoforms have been identified. [provided by RefSeq, Jul 2008].
CHCHD6	-714	chr3:126422163-126422643	480	32	6	2.6015	4.1081	6.8963	chr3	126423117	126679244	+	NM_032343	coiled-coil-helix-coiled-coil-helix domain-containing protein 6	NP_115719	84303
DMD	621	chrX:32429398-32430103	705	45	9	2.5923	4.6181	9.4688	chrX	32430371	31137344	-	NM_004012	dystrophin Dp260-2 isoform	NP_004003	1756	The dystrophin gene is the largest gene found in nature, measuring 2.4 Mb. The gene was identified through a positional cloning approach, targeted at the isolation of the gene responsible for Duchenne (DMD) and Becker (BMD) Muscular Dystrophies. DMD is a recessive, fatal, X-linked disorder occurring at a frequency of about 1 in 3,500 new-born males. BMD is a milder allelic form. In general, DMD p…
MCRS1	1715	chr12:49958214-49958801	587	36	7	2.583	4.2915	7.753	chr12	49960222	49952085	-	NM_001012300	microspherule protein 1 isoform 2	NP_001012300	10445
UBAC1	866	chr9:138852120-138852600	480	40	8	2.5692	4.4545	8.3701	chr9	138853226	138824814	-	NM_016172	ubiquitin-associated domain-containing protein	NP_057256	10422
CORO2B	660	chr15:68924728-68925244	516	40	8	2.5692	4.4545	8.3701	chr15	68924326	69020144	+	NM_001190457	coronin-2B isoform 2	NP_001177386	10391
MIR520E	835	chr19:54179559-54180039	480	35	7	2.5413	4.2706	7.5117	chr19	54178964	54179051	+	NR_030183			574461	microRNAs (miRNAs) are short (20-24 nt) non-coding RNAs that are involved in post-transcriptional regulation of gene expression in multicellular organisms by affecting both the stability and translation of mRNAs. miRNAs are transcribed by RNA polymerase II as part of capped and polyadenylated primary transcripts (pri-miRNAs) that can be either protein-coding or non-coding. The primary transcript …
RNF19A	-1973	chr8:101317220-101317700	480	26	5	2.5186	3.8443	5.5548	chr8	101315487	101269287	-	NM_015435	E3 ubiquitin-protein ligase RNF19A	NP_056250	25897	The protein encoded this gene contains two RING-finger motifs and an IBR (in between RING fingers) motif. This protein is an E3 ubiquintin ligase that is localized in Lewy bodies (LBs), a characteristic neuronal inclusion in Parkinson's disease (PD) brains. This protein interacts with UBE2L3/UBCH7 and UBE2E2/UBCH8, but not other ubiquitin-conjugating enzymes. This protein is found to bind and ubi…
OR10AG1	1691	chr11:55734008-55734488	480	34	7	2.4984	4.2492	7.0327	chr11	55735939	55735033	-	NM_001005491	olfactory receptor 10AG1	NP_001005491	282770	Olfactory receptors interact with odorant molecules in the nose, to initiate a neuronal response that triggers the perception of a smell. The olfactory receptor proteins are members of a large family of G-protein-coupled receptors (GPCR) arising from single coding-exon genes. Olfactory receptors share a 7-transmembrane domain structure with many neurotransmitter and hormone receptors and are resp…
C16orf62	895	chr16:19567391-19567871	480	34	7	2.4984	4.2492	7.0327	chr16	19566736	19712485	+	NM_020314	hypothetical protein LOC57020	NP_064710	57020
CKAP2L	-1139	chr2:113523153-113523633	480	38	8	2.4931	4.4165	7.8923	chr2	113522254	113495443	-	NM_152515	cytoskeleton-associated protein 2-like	NP_689728	150468
OR5D13	1878	chr11:55542551-55543031	480	21	4	2.47	3.5569	4.6979	chr11	55540913	55541858	+	NM_001001967	olfactory receptor 5D13	NP_001001967	390142	Olfactory receptors interact with odorant molecules in the nose, to initiate a neuronal response that triggers the perception of a smell. The olfactory receptor proteins are members of a large family of G-protein-coupled receptors (GPCR) arising from single coding-exon genes. Olfactory receptors share a 7-transmembrane domain structure with many neurotransmitter and hormone receptors and are resp…
OR6P1	540	chr1:158532614-158533094	480	29	6	2.4565	4.0356	5.9351	chr1	158533394	158532440	-	NM_001160325	olfactory receptor 6P1	NP_001153797	128366	Olfactory receptors interact with odorant molecules in the nose, to initiate a neuronal response that triggers the perception of a smell. The olfactory receptor proteins are members of a large family of G-protein-coupled receptors (GPCR) arising from single coding-exon genes. Olfactory receptors share a 7-transmembrane domain structure with many neurotransmitter and hormone receptors and are resp…
CCNT1	1970	chr12:49108571-49109051	480	33	7	2.4543	4.2272	6.7951	chr12	49110781	49086751	-	NM_001240	cyclin-T1	NP_001231	904	The protein encoded by this gene belongs to the highly conserved cyclin family, whose members are characterized by a dramatic periodicity in protein abundance through the cell cycle. Cyclins function as regulators of CDK kinases. Different cyclins exhibit distinct expression and degradation patterns which contribute to the temporal coordination of each mitotic event. This cyclin tightly associate…
SNORA58	1167	chr3:131196638-131197182	544	41	9	2.4539	4.5489	8.2796	chr3	131198077	131197841	-	NR_002985			677836
RGSL1	1135	chr1:182420150-182420630	480	37	8	2.4536	4.3967	7.4192	chr1	182419255	182529732	+	NM_001137669	regulator of G-protein signaling protein-like	NP_001131141	353299
GUCA1C	-1307	chr3:108673744-108674224	480	37	8	2.4536	4.3967	7.4192	chr3	108672677	108626641	-	NM_005459	guanylyl cyclase-activating protein 3	NP_005450	9626
CC2D2B	-294	chr10:97759313-97759793	480	24	5	2.4015	3.7857	5.0753	chr10	97759847	97792441	+	NM_001001732	protein CC2D2B isoform 2	NP_001001732	387707
ACOX3	577	chr4:8441635-8442115	480	24	5	2.4015	3.7857	5.0753	chr4	8442452	8368008	-	NM_001101667	peroxisomal acyl-coenzyme A oxidase 3 isoform b	NP_001095137	8310	Acyl-Coenzyme A oxidase 3 also know as pristanoyl -CoA oxidase (ACOX3)is involved in the desaturation of 2-methyl branched fatty acids in peroxisomes. Unlike the rat homolog, the human gene is expressed in very low amounts in liver such that its mRNA was undetectable by routine Northern-blot analysis or its product by immunoblotting or by enzyme activity measurements. However the human cDNA encod…
FAM115A	-467	chr7:143582693-143583173	480	20	4	2.3992	3.5215	4.2158	chr7	143582466	143548460	-	NM_001206941	hypothetical protein LOC9747 isoform 3	NP_001193870	9747
PHF14	-665	chr7:11012593-11013073	480	39	9	2.3797	4.5118	7.5791	chr7	11013498	11147376	+	NM_014660	PHD finger protein 14	NP_055475	9678
PARL	-1818	chr3:183604271-183604751	480	35	8	2.3714	4.3556	6.9511	chr3	183602693	183547172	-	NM_001037639	presenilins-associated rhomboid-like protein, mitochondrial isoform 2 preproprotein	NP_001032728	55486	This gene encodes a mitochondrial integral membrane protein. Following proteolytic processing of this protein, a small peptide (P-beta) is formed and translocated to the nucleus. This gene may be involved in signal transduction via regulated intramembrane proteolysis of membrane-tethered precursor proteins. Variation in this gene has been associated with increased risk for type 2 diabetes. Altern…
BMP15	-935	chrX:50652559-50653039	480	35	8	2.3714	4.3556	6.9511	chrX	50653734	50659641	+	NM_005448	bone morphogenetic protein 15 precursor	NP_005439	9210	The protein encoded by this gene is a member of the bone morphogenetic protein family which is part of the transforming growth factor-beta superfamily. The transforming growth factor-beta superfamily includes large families of growth and differentiation factors. It is thought that this protein may be involved in oocyte maturation and follicular development as a homodimer or by forming heterodimer…
ARSG	1166	chr17:66256248-66256728	480	35	8	2.3714	4.3556	6.9511	chr17	66255322	66417000	+	NM_014960	arylsulfatase G precursor	NP_055775	22901	Sulfatases, such as ARSG, hydrolyze sulfate esters from sulfated steroids, carbohydrates, proteoglycans, and glycolipids. They are involved in hormone biosynthesis, modulation of cell signaling, and degradation of macromolecules. This gene, a novel arylsulfatase, has activity toward pseudosubstrates including p-nitrocatechol sulfate and 4-methylumbelliferyl sulfate. Activity is competitively inhi…
DCK	-1282	chr4:71857742-71858222	480	31	7	2.3621	4.181	6.0907	chr4	71859264	71896629	+	NM_000788	deoxycytidine kinase	NP_000779	1633	Deoxycytidine kinase (DCK) is required for the phosphorylation of several deoxyribonucleosides and their nucleoside analogs. Deficiency of DCK is associated with resistance to antiviral and anticancer chemotherapeutic agents. Conversely, increased deoxycytidine kinase activity is associated with increased activation of these compounds to cytotoxic nucleoside triphosphate derivatives. DCK is clini…
ABCG5	1866	chr2:44063852-44064332	480	31	7	2.3621	4.181	6.0907	chr2	44065958	44039610	-	NM_022436	ATP-binding cassette sub-family G member 5	NP_071881	64240	The protein encoded by this gene is a member of the superfamily of ATP-binding cassette (ABC) transporters. ABC proteins transport various molecules across extra- and intra-cellular membranes. ABC genes are divided into seven distinct subfamilies (ABC1, MDR/TAP, MRP, ALD, OABP, GCN20, White). This protein is a member of the White subfamily. The protein encoded by this gene functions as a half-tra…
FLJ45079	-1969	chr17:75881808-75882469	661	42	10	2.3522	4.6355	7.9776	chr17	75880169	75875082	-	NR_028337			400624
CCDC142	-552	chr2:74710626-74711193	567	42	10	2.3522	4.6355	7.9776	chr2	74710357	74699958	-	NM_032779	coiled-coil domain-containing protein 142	NP_116168	84865
SLC8A1	-1301	chr2:40740636-40741116	480	38	9	2.3411	4.4925	7.348	chr2	40739575	40339285	-	NM_001112802	sodium/calcium exchanger 1 isoform D	NP_001106273	6546	In cardiac myocytes, Ca(2+) concentrations alternate between high levels during contraction and low levels during relaxation. The increase in Ca(2+) concentration during contraction is primarily due to release of Ca(2+) from intracellular stores. However, some Ca(2+) also enters the cell through the sarcolemma (plasma membrane). During relaxation, Ca(2+) is sequestered within the intracellular st…
EIF4ENIF1	1910	chr22:31883397-31883877	480	34	8	2.3285	4.3342	6.4883	chr22	31885547	31835344	-	NM_001164501	eukaryotic translation initiation factor 4E transporter isoform a	NP_001157973	56478	The protein encoded by this gene is a nucleocytoplasmic shuttle protein for the translation initiation factor eIF4E. This shuttle protein interacts with the importin alpha-beta complex to mediate nuclear import of eIF4E. It is predominantly cytoplasmic; its own nuclear import is regulated by a nuclear localization signal and nuclear export signals. Multiple transcript variants encoding different …
CREM	-804	chr10:35463442-35463996	554	41	10	2.3164	4.6176	7.7486	chr10	35464523	35501886	+	NM_182770	cAMP-responsive element modulator isoform n	NP_877571	1390	This gene encodes a bZIP transcription factor that binds to the cAMP responsive element found in many viral and cellular promoters. It is an important component of cAMP-mediated signal transduction during the spermatogenetic cycle, as well as other complex processes. Alternative promoter and translation initiation site usage allows this gene to exert spatial and temporal specificity to cAMP respo…
RHOB	1741	chr2:20648335-20648815	480	30	7	2.3138	4.1569	5.8589	chr2	20646834	20649201	+	NM_004040	rho-related GTP-binding protein RhoB precursor	NP_004031	388
RARA	699	chr17:38498729-38499209	480	30	7	2.3138	4.1569	5.8589	chr17	38498270	38513895	+	NM_001024809	retinoic acid receptor alpha isoform 2	NP_001019980	5914	This gene represents a nuclear retinoic acid receptor. The encoded protein, retinoic acid receptor alpha, regulates transcription in a ligand-dependent manner. This gene has been implicated in regulation of development, differentiation, apoptosis, granulopoeisis, and transcription of clock genes. Translocations between this locus and several other loci have been associated with acute promyelocyti…
SNORD58A	139	chr18:47017338-47017818	480	37	9	2.3016	4.4727	6.8897	chr18	47017717	47017652	-	NR_002571			26791
PPP2R2A	298	chr8:26150789-26151269	480	29	7	2.2639	4.1319	5.4003	chr8	26150731	26230195	+	NM_001177591	serine/threonine-protein phosphatase 2A 55 kDa regulatory subunit B alpha isoform isoform 2	NP_001171062	5520	The product of this gene belongs to the phosphatase 2 regulatory subunit B family. Protein phosphatase 2 is one of the four major Ser/Thr phosphatases, and it is implicated in the negative control of cell growth and division. It consists of a common heteromeric core enzyme, which is composed of a catalytic subunit and a constant regulatory subunit, that associates with a variety of regulatory sub…
DPP4	1400	chr2:162929404-162929901	497	43	11	2.2617	4.7158	7.9257	chr2	162931052	162848754	-	NM_001935	dipeptidyl peptidase 4	NP_001926	1803	The protein encoded by this gene is identical to adenosine deaminase complexing protein-2, and to the T-cell activation antigen CD26. It is an intrinsic membrane glycoprotein and a serine exopeptidase that cleaves X-proline dipeptides from the N-terminus of polypeptides. [provided by RefSeq, Jul 2008]. Publication Note: This RefSeq record includes a subset of the publications that are available f…
TRIM38	-1709	chr6:25961121-25961601	480	36	9	2.261	4.4524	6.6626	chr6	25963070	25985352	+	NM_006355	tripartite motif-containing protein 38	NP_006346	10475	The protein encoded by this gene is a member of the tripartite motif (TRIM) family. The TRIM motif includes three zinc-binding domains, a RING, a B-box type 1 and a B-box type 2, and a coiled-coil region. The function of this protein has not been identified. [provided by RefSeq, Jul 2008].
DEFB126	-1706	chr20:121305-121785	480	36	9	2.261	4.4524	6.6626	chr20	123251	126392	+	NM_030931	beta-defensin 126 preproprotein	NP_112193	81623	Defensins are cysteine-rich cationic polypeptides that are important in the immunologic response to invading microorganisms. The protein encoded by this gene is secreted and is a member of the beta defensin protein family. Beta defensin genes are found in several clusters throughout the genome, with this gene mapping to a cluster at 20p13. The encoded protein is highly similar to an epididymal-sp…
KCNJ15	312	chr21:39628941-39629421	480	39	10	2.2422	4.5805	7.0688	chr21	39628869	39673746	+	NM_170736	ATP-sensitive inward rectifier potassium channel 15	NP_733932	3772	Potassium channels are present in most mammalian cells, where they participate in a wide range of physiologic responses. The protein encoded by this gene is an integral membrane protein and inward-rectifier type potassium channel. The encoded protein has a greater tendency to allow potassium to flow into a cell rather than out of a cell. Three transcript variants encoding the same protein have be…
LOC653501	-1158	chr9:41610462-41610942	480	32	8	2.239	4.2894	5.8052	chr9	41609544	41588832	-	NR_003528			653501
FGGY	717	chr1:59763082-59763601	519	42	11	2.2267	4.6983	7.4769	chr1	59762624	60228402	+	NM_018291	FGGY carbohydrate kinase domain-containing protein isoform b	NP_060761	55277	This gene encodes a member of the FGGY kinase family which acts as a phosphotransferase. Some GWAS studies have found an association with amyotrophic lateral sclerosis patients, yet other GWAS studies have not found any association. [provided by RefSeq, Sep 2011].
ZNF677	-1079	chr19:53758950-53759430	480	35	9	2.2194	4.4316	6.437	chr19	53758111	53738637	-	NM_182609	zinc finger protein 677	NP_872415	342926
CHUK	288	chr10:101988816-101989296	480	35	9	2.2194	4.4316	6.437	chr10	101989344	101948123	-	NM_001278	inhibitor of nuclear factor kappa-B kinase subunit alpha	NP_001269	1147	This gene encodes a member of the serine/threonine protein kinase family. The encoded protein, a component of a cytokine-activated protein complex that is an inhibitor of the essential transcription factor NF-kappa-B complex, phosphorylates sites that trigger the degradation of the inhibitor via the ubiquination pathway, thereby activating the transcription factor. [provided by RefSeq, Jul 2008].…
MIR526A2	-607	chr19:54229325-54229812	487	38	10	2.2036	4.5613	6.8448	chr19	54230175	54230240	+	NR_030208			574486	microRNAs (miRNAs) are short (20-24 nt) non-coding RNAs that are involved in post-transcriptional regulation of gene expression in multicellular organisms by affecting both the stability and translation of mRNAs. miRNAs are transcribed by RNA polymerase II as part of capped and polyadenylated primary transcripts (pri-miRNAs) that can be either protein-coding or non-coding. The primary transcript …
LOC158696	-1603	chrX:137701162-137701642	480	38	10	2.2036	4.5613	6.8448	chrX	137699799	137696891	-	NR_026935			158696
GRAMD1B	98	chr11:123396385-123396865	480	38	10	2.2036	4.5613	6.8448	chr11	123396527	123493518	+	NM_020716	GRAM domain-containing protein 1B	NP_065767	57476
FAM9A	1022	chrX:8768116-8768596	480	31	8	2.1921	4.266	5.5807	chrX	8769378	8758836	-	NM_001171186	family with sequence similarity 9, member A	NP_001164657	171482	This gene is a member of a gene family which arose through duplication on the X chromosome. The encoded protein may be a nuclear protein that is localized to the nucleolus, and has some similarity to a synaptonemal complex protein. Multiple alternatively spliced variants, encoding the same protein, have been identified. [provided by RefSeq, Aug 2011].
EPT1	-1814	chr2:26566813-26567465	652	44	12	2.1804	4.7906	7.6653	chr2	26568953	26618759	+	NM_033505	ethanolaminephosphotransferase 1	NP_277040	85465	This gene encodes a selenoprotein, which contains a selenocysteine (Sec) residue at its active site. The selenocysteine is encoded by the UGA codon that normally signals translation termination. The 3' UTR of selenoprotein genes have a common stem-loop structure, the sec insertion sequence (SECIS), that is necessary for the recognition of UGA as a Sec codon rather than as a stop signal. [provided…
SNRNP40	1651	chr1:31767454-31768533	1079	63	18	2.1688	5.3323	10.5804	chr1	31769644	31732414	-	NM_004814	U5 small nuclear ribonucleoprotein 40 kDa protein	NP_004805	9410	This gene encodes a component of the U5 small nuclear ribonucleoprotein (snRNP) particle. The U5 snRNP is part of the spliceosome, a multiprotein complex that catalyzes the removal of introns from pre-messenger RNAs. [provided by RefSeq, Jul 2008].
EHD4	-868	chr15:42265383-42265863	480	40	11	2.1542	4.6621	6.8134	chr15	42264755	42191638	-	NM_139265	EH domain-containing protein 4	NP_644670	30844
IFLTD1	-105	chr12:25801233-25801954	721	59	17	2.1486	5.2442	9.9489	chr12	25801488	25650446	-	NM_001145727	intermediate filament tail domain-containing protein 1 isoform 3	NP_001139199	160492
KRTAP21-1	-1248	chr21:32128704-32129184	480	33	9	2.1324	4.3881	5.7691	chr21	32127696	32127456	-	NM_181619	keratin-associated protein 21-1	NP_853650	337977
PMAIP1	-1412	chr18:57565539-57566019	480	36	10	2.1235	4.5212	6.1815	chr18	57567191	57571538	+	NM_021127	phorbol-12-myristate-13-acetate-induced protein 1	NP_066950	5366
TSPYL5	-1911	chr8:98291847-98292327	480	23	6	2.117	3.8658	4.0938	chr8	98290176	98285713	-	NM_033512	testis-specific Y-encoded-like protein 5	NP_277047	85453
C4orf19	-1641	chr4:37583973-37584453	480	26	7	2.1035	4.0518	4.5051	chr4	37585854	37595132	+	NM_018302	hypothetical protein LOC55286	NP_060772	55286
SNORA70B	1908	chr2:61642364-61642844	480	29	8	2.0939	4.2169	4.918	chr2	61644512	61644378	-	NR_003707			100124537
C7orf30	830	chr7:23339529-23340009	480	29	8	2.0939	4.2169	4.918	chr7	23338939	23349180	+	NM_138446	hypothetical protein LOC115416	NP_612455	115416
SPATA19	-1212	chr11:133716364-133716844	480	32	9	2.087	4.3654	5.3321	chr11	133715392	133710516	-	NM_174927	spermatogenesis-associated protein 19, mitochondrial precursor	NP_777587	219938
DHX35	-1814	chr20:37588926-37589406	480	32	9	2.087	4.3654	5.3321	chr20	37590980	37668366	+	NM_001190809	probable ATP-dependent RNA helicase DHX35 isoform 2	NP_001177738	60625	DEAD box proteins characterized by the conserved motif Asp-Glu-Ala-Asp (DEAD), are putative RNA helicases. They are implicated in a number of cellular processes involving alteration of RNA secondary structure such as translation initiation, nuclear and mitochondrial splicing, and ribosome and spliceosome assembly. Based on their distribution patterns, some members of the DEAD box protein family a…
PLK2	-1846	chr5:57757519-57757999	480	35	10	2.0818	4.5004	5.9635	chr5	57755913	57749809	-	NM_006622	serine/threonine-protein kinase PLK2	NP_006613	10769	Serum-inducible kinase is a member of the 'polo' family of serine/threonine protein kinases that have a role in normal cell division.[supplied by OMIM, Jul 2002]. Publication Note: This RefSeq record includes a subset of the publications that are available for this gene. Please see the Gene record to access additional publications.
NFATC2IP	-921	chr16:28961156-28961636	480	35	10	2.0818	4.5004	5.9635	chr16	28962317	28977767	+	NM_032815	NFATC2-interacting protein	NP_116204	84901
DEFB131	-217	chr4:9445802-9446282	480	35	10	2.0818	4.5004	5.9635	chr4	9446259	9452240	+	NM_001040448	beta-defensin 131 precursor	NP_001035538	644414
C8orf22	-1881	chr8:49982781-49983261	480	35	10	2.0818	4.5004	5.9635	chr8	49984902	49988642	+	NM_001007176	pancreatic progenitor cell differentiation and	NP_001007177	492307
LOC647107	1911	chr3:163018938-163019418	480	38	11	2.0781	4.624	6.378	chr3	163021089	162895030	-	NR_033945			647107
ACRC	-484	chrX:70797149-70797629	480	38	11	2.0781	4.624	6.378	chrX	70797873	70833433	+	NM_052957	acidic repeat-containing protein	NP_443189	93953
FAM26F	-1728	chr6:116780395-116781260	865	41	12	2.0754	4.7381	6.7932	chr6	116782555	116784934	+	NM_001010919	hypothetical protein LOC441168	NP_001010919	441168
ATP8B4	1258	chr15:50409910-50410413	503	47	14	2.0721	4.943	7.6248	chr15	50411419	50150434	-	NM_024837	probable phospholipid-transporting ATPase IM	NP_079113	79895
MORN4	912	chr10:99392085-99392779	694	50	15	2.0713	5.0356	8.0411	chr10	99393344	99374309	-	NM_178832	MORN repeat-containing protein 4	NP_849154	118812
FUBP1	1706	chr1:78442796-78443347	551	53	16	2.0708	5.1228	8.4577	chr1	78444777	78413590	-	NM_003902	far upstream element-binding protein 1	NP_003893	8880	This gene encodes a ssDNA binding protein that activates the far upstream element (FUSE) of c-myc and stimulates expression of c-myc in undifferentiated cells. Regulation of FUSE by FUBP occurs through single-strand binding of FUBP to the non-coding strand. This protein has been shown to function as an ATP-dependent DNA helicase. [provided by RefSeq, Jul 2008]. Publication Note: This RefSeq recor…
PXDNL	-1861	chr8:52723626-52724106	480	31	9	2.0401	4.342	5.1164	chr8	52722005	52232136	-	NM_144651	peroxidasin-like protein precursor	NP_653252	137902
COMMD5	-583	chr8:146079275-146079755	480	31	9	2.0401	4.342	5.1164	chr8	146078932	146075550	-	NM_001081003	COMM domain-containing protein 5	NP_001074472	28991
LOC253039	118	chr9:123605138-123605736	598	43	13	2.0393	4.827	6.9949	chr9	123605319	123616651	+	NR_024408			253039
C12orf47	-1894	chr12:112282360-112282840	480	43	13	2.0393	4.827	6.9949	chr12	112280706	112277572	-	NR_015404			51275
IFIT2	-1027	chr10:91060438-91060918	480	34	10	2.039	4.4789	5.5323	chr10	91061705	91069033	+	NM_001547	interferon-induced protein with	NP_001538	3433
C6orf52	918	chr6:10693681-10694161	480	34	10	2.039	4.4789	5.5323	chr6	10694839	10671650	-	NM_001145020	putative uncharacterized protein C6orf52	NP_001138492	347744
PSG3	958	chr19:43243470-43243950	480	40	12	2.0387	4.7198	6.3654	chr19	43244668	43225793	-	NM_021016	pregnancy-specific beta-1-glycoprotein 3 precursor	NP_066296	5671	The human pregnancy-specific glycoproteins (PSGs) are a family of proteins that are synthesized in large amounts by placental trophoblasts and released into the maternal circulation during pregnancy. Molecular cloning and analysis of several PSG genes has indicated that the PSGs form a subgroup of the carcinoembryonic antigen (CEA) gene family, which belongs to the immunoglobulin superfamily of g…
MBTPS2	147	chrX:21857562-21858042	480	37	11	2.0386	4.6043	5.9487	chrX	21857655	21903541	+	NM_015884	membrane-bound transcription factor site-2 protease	NP_056968	51360	This gene encodes a intramembrane zinc metalloprotease, which is essential in development. This protease functions in the signal protein activation involved in sterol control of transcription and the ER stress response. Mutations in this gene have been associated with ichthyosis follicularis with atrichia and photophobia (IFAP syndrome); IFAP syndrome has been quantitatively linked to a reduction…
GNPDA2	1871	chr4:44726443-44727039	596	42	13	2.0043	4.8095	6.5713	chr4	44728612	44704167	-	NM_138335	glucosamine-6-phosphate isomerase 2	NP_612208	132789	Glucosamine-6-phosphate deaminase (EC 3.5.99.6) is an allosteric enzyme that catalyzes the reversible conversion of D-glucosamine-6-phosphate into D-fructose-6-phosphate and ammonium (Arreola et al., 2003 [PubMed 12965206]).[supplied by OMIM, Jan 2010]. Publication Note: This RefSeq record includes a subset of the publications that are available for this gene. Please see the Gene record to access…
C10orf26	1953	chr10:104505433-104505925	492	39	12	2.0012	4.701	6.1538	chr10	104503726	104576021	+	NM_001083913	outcome predictor in acute leukemia 1 isoform 1	NP_001077382	54838

## Sheet: S2_Pre-DM Vs Control (hypo)
Prediabetes Vs Control hypomethylated DMRs in promoter (by MANorm) Column A: GeneName, the name of DMR-associated gene. Column B: DMR_To_TSS, the distance of DMR (middle position) to TSS. Positive value indicates downstream, and negative value indicates upstream. Column C: DMR_Locus, the genomic locus of DMR. Column D: DMR_Length, the length of DMR. Column E ~ F: RawTagCount, raw tag count of eac…
GeneName	DMR_To_TSS	DMR_Locus	DMR_Length	RawTagCount_Pre-diabetes	RawTagCount_Control	M_value_rescaled	A_value_rescaled	"-log10(p-value)"	Genechrom	GeneTSS	GeneTTS	Strand	Accession	ProteinName	ProteinID	GeneID	mRNADescription
SOX5	-1545	chr12:23738768-23739338	570	13	68	-2.0043	5.1064	7.4162	chr12	23737508	23685230	-	NM_178010	transcription factor SOX-5 isoform c	NP_821078	6660	This gene encodes a member of the SOX (SRY-related HMG-box) family of transcription factors involved in the regulation of embryonic development and in the determination of the cell fate. The encoded protein may act as a transcriptional regulator after forming a protein complex with other proteins. The encoded protein may play a role in chondrogenesis. A pseudogene of this gene is located on chrom…
HOXA10	-1786	chr7:27215423-27216060	637	12	63	-2.0086	4.9957	6.7942	chr7	27213955	27210209	-	NM_018951	homeobox protein Hox-A10	NP_061824	3206	In vertebrates, the genes encoding the class of transcription factors called homeobox genes are found in clusters named A, B, C, and D on four separate chromosomes. Expression of these proteins is spatially and temporally regulated during embryonic development. This gene is part of the A cluster on chromosome 7 and encodes a DNA-binding transcription factor that may regulate gene expression, morp…
MAMDC4	-356	chr9:139746199-139746726	527	11	58	-2.013	4.8761	6.1738	chr9	139746818	139755251	+	NM_206920	apical endosomal glycoprotein precursor	NP_996803	158056
IGDCC4	-1900	chr15:65717057-65717564	507	10	53	-2.0177	4.7461	5.947	chr15	65715410	65673824	-	NM_020962	immunoglobulin superfamily DCC subclass member 4 precursor	NP_066013	57722
SLC2A4	-1553	chr17:7183251-7183750	499	14	74	-2.0197	5.219	8.2454	chr17	7185053	7191367	+	NM_001042	solute carrier family 2, facilitated glucose transporter member 4	NP_001033	6517	This gene is a member of the solute carrier family 2 (facilitated glucose transporter) family and encodes a protein that functions as an insulin-regulated facilitative glucose transporter. In the absence of insulin, this integral membrane protein is sequestered within the cells of muscle and adipose tissue. Within minutes of insulin stimulation, the protein moves to the cell surface and begins to…
NIF3L1	-30	chr2:201756172-201757049	877	14	74	-2.0197	5.219	8.2454	chr2	201756640	201768655	+	NM_001142356	NIF3-like protein 1 isoform 3	NP_001135828	60491
FAM83A	-555	chr8:124193946-124194447	501	9	48	-2.0225	4.6035	5.3235	chr8	124194751	124221207	+	NM_032899	hypothetical protein LOC84985 isoform a	NP_116288	84985
DDX11L2	19	chr2:114361035-114361515	480	9	48	-2.0225	4.6035	5.3235	chr2	114361294	114356604	-	NR_024004			84771
SNORD115-21	-807	chr15:25450359-25450843	484	8	43	-2.0275	4.4457	4.7018	chr15	25451408	25477615	+	NR_003313			100033603
SNORD115-20	-807	chr15:25450359-25450843	484	8	43	-2.0275	4.4457	4.7018	chr15	25451408	25451490	+	NR_003312			100033460
SNORD115-15	-807	chr15:25450359-25450843	484	8	43	-2.0275	4.4457	4.7018	chr15	25451408	25477615	+	NR_003307			100033453
RPP14	-850	chr3:58290764-58291479	715	8	43	-2.0275	4.4457	4.7018	chr3	58291971	58305920	+	NM_001098783	ribonuclease P protein subunit p14	NP_001092253	11102
LOC100128787	294	chr1:101112021-101112512	491	8	43	-2.0275	4.4457	4.7018	chr1	101112560	101092605	-	NR_038914			100128787
FCRL1	653	chr1:157789047-157789527	480	7	38	-2.0327	4.269	4.0827	chr1	157789940	157764193	-	NM_001159397	Fc receptor-like protein 1 isoform 2 precursor	NP_001152869	115350	This gene encodes a member of the immunoglobulin receptor superfamily and is one of several Fc receptor-like glycoproteins clustered on the long arm of chromosome 1. The encoded protein contains three extracellular C2-like immunoglobulin domains, a transmembrane domain and a cytoplasmic domain with two immunoreceptor-tyrosine activation motifs. This protein may play a role in the regulation of ca…
C6orf94	1923	chr6:144187255-144187735	480	7	38	-2.0327	4.269	4.0827	chr6	144185572	144259483	+	NM_001013623	hypothetical protein LOC153918	NP_001013645	153918
GPR123	1629	chr10:134902782-134903293	511	17	91	-2.037	5.5051	10.1256	chr10	134901408	134945179	+	NM_001083909	probable G-protein coupled receptor 123	NP_001077378	84435
NMUR1	1930	chr2:232392955-232393549	594	10	54	-2.0441	4.7593	6.1536	chr2	232395182	232387870	-	NM_006056	neuromedin-U receptor 1	NP_006047	10316
CYP2B7P1	-471	chr19:41429385-41430012	627	10	54	-2.0441	4.7593	6.1536	chr19	41430169	41456565	+	NR_001278			1556
CYP4F8	923	chr19:15726521-15727382	861	15	81	-2.0502	5.3325	8.8765	chr19	15726028	15740447	+	NM_007253	cytochrome P450 4F8	NP_009184	11283	This gene, CYP4F8, encodes a member of the cytochrome P450 superfamily of enzymes. The cytochrome P450 proteins are monooxygenases which catalyze many reactions involved in drug metabolism and synthesis of cholesterol, steroids and other lipids. This protein localizes to the endoplasmic reticulum and functions as a 19-hydroxylase of prostaglandins in seminal vesicles. This gene is part of a clust…
PLEKHO2	-1350	chr15:65132487-65132976	489	9	49	-2.0516	4.618	5.5285	chr15	65134081	65160201	+	NM_001195059	pleckstrin homology domain-containing family O member 2 isoform 2	NP_001181988	80301
PLAGL1	670	chr6:144328629-144329113	484	9	49	-2.0516	4.618	5.5285	chr6	144329541	144261436	-	NM_002656	zinc finger protein PLAGL1 isoform 1	NP_002647	5325	This gene encodes a C2H2 zinc finger protein with transactivation and DNA-binding activities. It has been shown to have anti-proliferative properties, and thus thought to function as a tumor suppressor. In addition, overexpression of this gene during fetal development is believed to underlie the rare disorder, transient neonatal diabetes mellitus (TNDM). This gene is imprinted, with preferential …
MGC16275	1357	chr17:72207862-72208344	482	9	49	-2.0516	4.618	5.5285	chr17	72209460	72206134	-	NR_026914			85001
HK1	250	chr10:71075550-71076169	619	11	60	-2.0611	4.9002	6.5791	chr10	71075609	71161637	+	NM_033496	hexokinase-1 isoform HKI-R	NP_277031	3098	Hexokinases phosphorylate glucose to produce glucose-6-phosphate, the first step in most glucose metabolism pathways. This gene encodes a ubiquitous form of hexokinase which localizes to the outer membrane of mitochondria. Mutations in this gene have been associated with hemolytic anemia due to hexokinase deficiency. Alternative splicing of this gene results in five transcript variants which enco…
TAF9B	-887	chrX:77395686-77396447	761	13	71	-2.0657	5.1371	8.0342	chrX	77395179	77385244	-	NM_015975	transcription initiation factor TFIID subunit 9B	NP_057059	51616	Initiation of transcription by RNA polymerase II requires the activities of more than 70 polypeptides. The protein that coordinates these activities is transcription factor IID (TFIID), which binds to the core promoter to position the polymerase properly, serves as the scaffold for assembly of the remainder of the transcription complex, and acts as a channel for regulatory signals. TFIID is compo…
PLA2G2C	-670	chr1:20502117-20502597	480	7	39	-2.0693	4.2873	4.2834	chr1	20501687	20490483	-	NM_001105572	putative inactive group IIC secretory	NP_001099042	391013
MS4A15	479	chr11:60524578-60525058	480	7	39	-2.0693	4.2873	4.2834	chr11	60524339	60544204	+	NM_152717	membrane-spanning 4-domains subfamily A member 15 isoform 2	NP_689930	219995
LOC553103	-1242	chr5:131706610-131707090	480	7	39	-2.0693	4.2873	4.2834	chr5	131705608	131646968	-	NR_037898			553103
ARID3C	-385	chr9:34628156-34628636	480	7	39	-2.0693	4.2873	4.2834	chr9	34628011	34621454	-	NM_001017363	AT-rich interactive domain-containing protein 3C	NP_001017363	138715	This gene is a member of the ARID (AT-rich interaction domain) family of proteins. The ARID domain is a helix-turn-helix motif-based DNA-binding domain. ARID family members have roles in embryonic patterning, cell lineage gene regulation, cell cycle control, transcriptional regulation and possibly in chromatin structure modification. [provided by RefSeq, Jul 2008].
ADRB2	-1243	chr5:148204672-148205152	480	7	39	-2.0693	4.2873	4.2834	chr5	148206155	148208197	+	NM_000024	beta-2 adrenergic receptor	NP_000015	154	This gene encodes beta-2-adrenergic receptor which is a member of the G protein-coupled receptor superfamily. This receptor is directly associated with one of its ultimate effectors, the class C L-type calcium channel Ca(V)1.2. This receptor-channel complex also contains a G protein, an adenylyl cyclase, cAMP-dependent kinase, and the counterbalancing phosphatase, PP2A. The assembly of the signal…
ZNF260	-1074	chr19:37019903-37020741	838	23	127	-2.0757	5.9622	14.3032	chr19	37019248	37001588	-	NM_001166038	zinc finger protein 260	NP_001159510	339324
SCLY	-1469	chr2:238967845-238968346	501	9	50	-2.0802	4.6323	5.7353	chr2	238969564	239008054	+	NM_016510	selenocysteine lyase	NP_057594	51540	Selenocysteine lyase (SCLY; EC 4.4.1.16) catalyzes the pyridoxal 5-prime phosphate-dependent conversion of L-selenocysteine to L-alanine and elemental selenium (Mihara et al., 2000 [PubMed 10692412]).[supplied by OMIM, Mar 2008].
ENG	-1712	chr9:130618514-130619004	490	9	50	-2.0802	4.6323	5.7353	chr9	130617047	130577290	-	NM_000118	endoglin isoform 2 precursor	NP_000109	2022	This gene encodes a homodimeric transmembrane protein which is a major glycoprotein of the vascular endothelium. This protein is a component of the transforming growth factor beta receptor complex and it binds TGFB1 and TGFB3 with high affinity. Mutations in this gene cause hereditary hemorrhagic telangiectasia, also known as Osler-Rendu-Weber syndrome 1, an autosomal dominant multisystemic vascu…
MIR766	-861	chrX:118781315-118782030	715	12	67	-2.096	5.0394	7.616	chrX	118780811	118780700	-	NR_030413			768218	microRNAs (miRNAs) are short (20-24 nt) non-coding RNAs that are involved in post-transcriptional regulation of gene expression in multicellular organisms by affecting both the stability and translation of mRNAs. miRNAs are transcribed by RNA polymerase II as part of capped and polyadenylated primary transcripts (pri-miRNAs) that can be either protein-coding or non-coding. The primary transcript …
INADL	-917	chr1:62206991-62207472	481	7	40	-2.1049	4.3051	4.4864	chr1	62208148	62629591	+	NM_176877	inaD-like protein	NP_795352	10207	This gene encodes a protein with multiple PDZ domains. PDZ domains mediate protein-protein interactions, and proteins with multiple PDZ domains often organize multimeric complexes at the plasma membrane. This protein localizes to tight junctions and to the apical membrane of epithelial cells. A similar protein in Drosophila is a scaffolding protein which tethers several members of a multimeric si…
TIMP1	294	chrX:47441743-47442223	480	6	35	-2.1204	4.1097	4.2733	chrX	47441689	47446190	+	NM_003254	metalloproteinase inhibitor 1 precursor	NP_003245	7076	This gene belongs to the TIMP gene family. The proteins encoded by this gene family are natural inhibitors of the matrix metalloproteinases (MMPs), a group of peptidases involved in degradation of the extracellular matrix. In addition to its inhibitory role against most of the known MMPs, the encoded protein is able to promote cell proliferation in a wide range of cell types, and may also have an…
MIR4724	-1813	chr17:29859847-29860327	480	6	35	-2.1204	4.1097	4.2733	chr17	29861900	29861989	+	NR_039877			100616248	microRNAs (miRNAs) are short (20-24 nt) non-coding RNAs that are involved in post-transcriptional regulation of gene expression in multicellular organisms by affecting both the stability and translation of mRNAs. miRNAs are transcribed by RNA polymerase II as part of capped and polyadenylated primary transcripts (pri-miRNAs) that can be either protein-coding or non-coding. The primary transcript …
TSR2	1850	chrX:54468369-54469036	667	14	80	-2.1307	5.2745	9.5039	chrX	54466852	54471731	+	NM_058163	pre-rRNA-processing protein TSR2 homolog	NP_477511	90121
PKP1	872	chr1:201253148-201253755	607	12	69	-2.1379	5.0604	8.0345	chr1	201252579	201302121	+	NM_001005337	plakophilin-1 isoform 1a	NP_001005337	5317	This gene encodes a member of the arm-repeat (armadillo) and plakophilin gene families. Plakophilin proteins contain numerous armadillo repeats, localize to cell desmosomes and nuclei, and participate in linking cadherins to intermediate filaments in the cytoskeleton. This protein may be involved in molecular recruitment and stabilization during desmosome formation. Mutations in this gene have be…
FAM20B	-706	chr1:178993983-178994751	768	12	69	-2.1379	5.0604	8.0345	chr1	178995073	179045702	+	NM_014864	glycosaminoglycan xylosylkinase precursor	NP_055679	9917
MIR604	-134	chr10:29833920-29834400	480	7	41	-2.1396	4.3225	4.6916	chr10	29834026	29833932	-	NR_030335			693189	microRNAs (miRNAs) are short (20-24 nt) non-coding RNAs that are involved in post-transcriptional regulation of gene expression in multicellular organisms by affecting both the stability and translation of mRNAs. miRNAs are transcribed by RNA polymerase II as part of capped and polyadenylated primary transcripts (pri-miRNAs) that can be either protein-coding or non-coding. The primary transcript …
CYP4F3	-578	chr19:15750888-15751368	480	7	41	-2.1396	4.3225	4.6916	chr19	15751706	15771570	+	NM_001199209	leukotriene-B(4) omega-hydroxylase 2 isoform b	NP_001186138	4051	This gene, CYP4F3, encodes a member of the cytochrome P450 superfamily of enzymes. The cytochrome P450 proteins are monooxygenases which catalyze many reactions involved in drug metabolism and synthesis of cholesterol, steroids and other lipids. This protein localizes to the endoplasmic reticulum. The enzyme starts the process of inactivating and degrading leukotriene B4, a potent mediator of inf…
LOC145216	1120	chr14:104314929-104315426	497	8	47	-2.1531	4.5084	5.5259	chr14	104314057	104324386	+	NR_038436			145216
TBPL2	37	chr14:55906986-55907466	480	6	36	-2.16	4.1295	4.486	chr14	55907263	55880929	-	NM_199047	TATA box-binding protein-like protein 2	NP_950248	387332
ARHGAP36	292	chrX:130192267-130192747	480	6	36	-2.16	4.1295	4.486	chrX	130192215	130223857	+	NM_144967	rho GTPase-activating protein 36 precursor	NP_659404	158763
AP1S3	-934	chr2:224703013-224703493	480	6	36	-2.16	4.1295	4.486	chr2	224702319	224620046	-	NM_001039569	AP-1 complex subunit sigma-3	NP_001034658	130340
CYP11B2	-42	chr8:143999061-143999541	480	9	53	-2.1627	4.6736	6.3654	chr8	143999259	143991974	-	NM_000498	cytochrome P450 11B2, mitochondrial precursor	NP_000489	1585	This gene encodes a member of the cytochrome P450 superfamily of enzymes. The cytochrome P450 proteins are monooxygenases which catalyze many reactions involved in drug metabolism and synthesis of cholesterol, steroids and other lipids. This protein localizes to the mitochondrial inner membrane. The enzyme has steroid 18-hydroxylase activity to synthesize aldosterone and 18-oxocortisol as well as…
ZNF76	-1569	chr6:35225693-35226187	494	7	42	-2.1736	4.3395	4.8989	chr6	35227509	35263760	+	NM_003427	zinc finger protein 76	NP_003418	7629
PRLHR	612	chr10:120354305-120354792	487	7	42	-2.1736	4.3395	4.8989	chr10	120355160	120352915	-	NM_004248	prolactin-releasing peptide receptor	NP_004239	2834	PRLHR is a 7-transmembrane domain receptor for prolactin-releasing hormone (PRLH; MIM 602663) that is highly expressed in anterior pituitary (Ozawa et al., 2002 [PubMed 11923475]).[supplied by OMIM, Mar 2008]. Publication Note: This RefSeq record includes a subset of the publications that are available for this gene. Please see the Gene record to access additional publications.
C14orf80	1472	chr14:105958796-105959319	523	7	42	-2.1736	4.3395	4.8989	chr14	105957585	105965585	+	NM_001134876	hypothetical protein LOC283643 isoform 2	NP_001128348	283643
ZNF613	1063	chr19:52431449-52432052	603	8	48	-2.1828	4.5233	5.7364	chr19	52430687	52449011	+	NM_024840	zinc finger protein 613 isoform 2	NP_079116	79898
HUNK	-1544	chr21:33243815-33244351	536	9	54	-2.1891	4.6868	6.5785	chr21	33245627	33376377	+	NM_014586	hormonally up-regulated neu tumor-associated	NP_055401	30811
TMEM19	229	chr12:72079866-72080346	480	6	37	-2.1984	4.1487	4.701	chr12	72079877	72097839	+	NM_018279	transmembrane protein 19	NP_060749	55266
TMED10	1879	chr14:75641200-75641741	541	8	49	-2.212	4.5379	5.9487	chr14	75643349	75598170	-	NM_006827	transmembrane emp24 domain-containing protein 10 precursor	NP_006818	10972	This gene is a member of the EMP24/GP25L/p24 family and encodes a protein with a GOLD domain. This type I membrane protein is localized to the plasma membrane and golgi cisternae and is involved in vesicular protein trafficking. The protein is also a member of a heteromeric secretase complex and regulates the complex's gamma-secretase activity without affecting its epsilon-secretase activity. Mut…
DEPDC7	-465	chr11:33036690-33037198	508	8	49	-2.212	4.5379	5.9487	chr11	33037409	33055128	+	NM_001077242	DEP domain-containing protein 7 isoform 1	NP_001070710	91614
ME1	-302	chr6:84140918-84141563	645	10	61	-2.217	4.8457	7.6405	chr6	84140938	83920109	-	NM_002395	NADP-dependent malic enzyme	NP_002386	4199	This gene encodes a cytosolic, NADP-dependent enzyme that generates NADPH for fatty acid biosynthesis. The activity of this enzyme, the reversible oxidative decarboxylation of malate, links the glycolytic and citric acid cycles. The regulation of expression for this gene is complex. Increased expression can result from elevated levels of thyroid hormones or by higher proportions of carbohydrates …
SETD8	-878	chr12:123867585-123868065	480	6	38	-2.2359	4.1674	4.918	chr12	123868703	123893900	+	NM_020382	N-lysine methyltransferase SETD8	NP_065115	387893
OR5M10	-611	chr11:56345560-56346056	496	7	44	-2.2392	4.3723	5.3193	chr11	56345197	56344249	-	NM_001004741	olfactory receptor 5M10	NP_001004741	390167	Olfactory receptors interact with odorant molecules in the nose, to initiate a neuronal response that triggers the perception of a smell. The olfactory receptor proteins are members of a large family of G-protein-coupled receptors (GPCR) arising from single coding-exon genes. Olfactory receptors share a 7-transmembrane domain structure with many neurotransmitter and hormone receptors and are resp…
DYRK1B	-1009	chr19:40325583-40326118	535	8	50	-2.2405	4.5522	6.1626	chr19	40324841	40315989	-	NM_006483	dual specificity tyrosine-phosphorylation-regulated kinase 1B isoform b	NP_006474	9149	DYRK1B is a member of the DYRK family of protein kinases. DYRK1B contains a bipartite nuclear localization signal and is found mainly in muscle and testis. The protein is proposed to be involved in the regulation of nuclear functions. Three isoforms of DYRK1B have been identified differing in the presence of two alternatively spliced exons within the catalytic domain. [provided by RefSeq, Jul 200…
DPP6	511	chr7:154002425-154003289	864	10	63	-2.2628	4.8686	8.0772	chr7	154002346	154685995	+	NM_001936	dipeptidyl aminopeptidase-like protein 6 isoform 2	NP_001927	1804	This gene encodes a single-pass type II membrane protein that is a member of the S9B family in clan SC of the serine proteases. This protein has no detectable protease activity, most likely due to the absence of the conserved serine residue normally present in the catalytic domain of serine proteases. However, it does bind specific voltage-gated potassium channels and alters their expression and …
TGFB3	691	chr14:76447018-76447784	766	9	57	-2.2658	4.7251	7.2266	chr14	76448092	76424441	-	NM_003239	transforming growth factor beta-3 preproprotein	NP_003230	7043	This gene encodes a member of the TGF-beta family of proteins. The encoded protein is secreted and is involved in embryogenesis and cell differentiation. Defects in this gene are a cause of familial arrhythmogenic right ventricular dysplasia 1. [provided by RefSeq, Mar 2009]. Publication Note: This RefSeq record includes a subset of the publications that are available for this gene. Please see th…
GPATCH1	-744	chr19:33570792-33571290	498	9	57	-2.2658	4.7251	7.2266	chr19	33571785	33621318	+	NM_018025	G patch domain-containing protein 1	NP_060495	55094
MYLK3	332	chr16:46781625-46782153	528	8	51	-2.2685	4.5662	6.378	chr16	46782221	46736193	-	NM_182493	putative myosin light chain kinase 3	NP_872299	91807	Phosphorylation of cardiac myosin heavy chains (see MYH7B, MIM 609928) and light chains (see MYL2, MIM 160781) by a kinase, such as MYLK3, potentiates the force and rate of cross-bridge recruitment in cardiac myocytes (Chan et al., 2008 [PubMed 18202317]).[supplied by OMIM, Jul 2008].
CLDN14	-224	chr21:37852305-37852919	614	8	51	-2.2685	4.5662	6.378	chr21	37852388	37832919	-	NM_001146079	claudin-14	NP_001139551	23562	Tight junctions represent one mode of cell-to-cell adhesion in epithelial or endothelial cell sheets, forming continuous seals around cells and serving as a physical barrier to prevent solutes and water from passing freely through the paracellular space. These junctions are comprised of sets of continuous networking strands in the outwardly facing cytoplasmic leaflet, with complementary grooves i…
IL2RB	1717	chr22:37543978-37544512	534	7	45	-2.2709	4.3881	5.5323	chr22	37545962	37521879	-	NM_000878	interleukin-2 receptor subunit beta precursor	NP_000869	3560	The interleukin 2 receptor, which is involved in T cell-mediated immune responses, is present in 3 forms with respect to ability to bind interleukin 2. The low affinity form is a monomer of the alpha subunit and is not involved in signal transduction. The intermediate affinity form consists of an alpha/beta subunit heterodimer, while the high affinity form consists of an alpha/beta/gamma subunit …
PLA2G4E	494	chr15:42342167-42342647	480	6	39	-2.2724	4.1857	5.1371	chr15	42342901	42273779	-	NM_001206670	cytosolic phospholipase A2 epsilon	NP_001193599	123745
MIR1827	-1071	chr12:100582350-100582830	480	6	39	-2.2724	4.1857	5.1371	chr12	100583661	100583727	+	NR_031728			100302217	microRNAs (miRNAs) are short (20-24 nt) non-coding RNAs that are involved in post-transcriptional regulation of gene expression in multicellular organisms by affecting both the stability and translation of mRNAs. miRNAs are transcribed by RNA polymerase II as part of capped and polyadenylated primary transcripts (pri-miRNAs) that can be either protein-coding or non-coding. The primary transcript …
GCH1	-670	chr14:55369972-55370452	480	6	39	-2.2724	4.1857	5.1371	chr14	55369542	55308723	-	NM_000161	GTP cyclohydrolase 1 isoform 1	NP_000152	2643	This gene encodes a member of the GTP cyclohydrolase family. The encoded protein is the first and rate-limiting enzyme in tetrahydrobiopterin (BH4) biosynthesis, catalyzing the conversion of GTP into 7,8-dihydroneopterin triphosphate. BH4 is an essential cofactor required by aromatic amino acid hydroxylases as well as nitric oxide synthases. Mutations in this gene are associated with malignant hy…
SLC1A5	1191	chr19:47289069-47289640	571	11	70	-2.2801	5.0097	8.6862	chr19	47290545	47278139	-	NM_001145144	neutral amino acid transporter B(0) isoform 2	NP_001138616	6510	The SLC1A5 gene encodes a sodium-dependent neutral amino acid transporter that can act as a receptor for RD114/type D retrovirus (Larriba et al., 2001 [PubMed 11781704]).[supplied by OMIM, Jan 2011].
AKR7A3	1087	chr1:19613889-19614498	609	15	96	-2.2925	5.4536	12.062	chr1	19615280	19609056	-	NM_012067	aflatoxin B1 aldehyde reductase member 3	NP_036199	22977	Aldo-keto reductases, such as AKR7A3, are involved in the detoxification of aldehydes and ketones.[supplied by OMIM, Apr 2004].
FLJ42351	182	chr2:113401248-113401903	655	12	77	-2.294	5.1384	9.7536	chr2	113401757	113399406	-	NR_033871			400999
RFX4	-638	chr12:106994011-106994542	531	7	46	-2.3019	4.4036	5.747	chr12	106994914	107156582	+	NM_001206691	transcription factor RFX4 isoform d	NP_001193620	5992	This gene is a member of the regulatory factor X gene family, which encodes transcription factors that contain a highly-conserved winged helix DNA binding domain. The protein encoded by this gene is structurally related to regulatory factors X1, X2, X3, and X5. It has been shown to interact with itself as well as with regulatory factors X2 and X3, but it does not interact with regulatory factor X…
ARPC2	-1073	chr2:219080543-219081058	515	7	46	-2.3019	4.4036	5.747	chr2	219081873	219119071	+	NM_152862	actin-related protein 2/3 complex subunit 2	NP_690601	10109	This gene encodes one of seven subunits of the human Arp2/3 protein complex. The Arp2/3 protein complex has been implicated in the control of actin polymerization in cells and has been conserved through evolution. The exact role of the protein encoded by this gene, the p34 subunit, has yet to be determined. Two alternatively spliced variants have been characterized to date. Additional alternative…
XAF1	-1486	chr17:6657429-6657909	480	6	40	-2.3081	4.2035	5.358	chr17	6659155	6678964	+	NM_199139	XIAP-associated factor 1 isoform 2	NP_954590	54739	X-linked inhibitor of apoptosis (XIAP; MIM 300079) is a potent member of the IAP family. All members of this family possess baculoviral IAP (BIR) repeats, cysteine-rich domains of approximately 80 amino acids that bind and inhibit caspases (e.g., CASP3; MIM 600636). XIAP has 3 BIR domains and a C-terminal RING zinc finger that possesses E3 ubiquitin ligase (see MIM 601623) activity. XAF1 antagoni…
PRG2	1462	chr11:57156424-57156913	489	6	40	-2.3081	4.2035	5.358	chr11	57158130	57154833	-	NM_002728	bone marrow proteoglycan isoform 1 preproprotein	NP_002719	5553	The protein encoded by this gene is the predominant constituent of the crystalline core of the eosinophil granule. High levels of the proform of this protein are also present in placenta and pregnancy serum, where it exists as a complex with several other proteins including pregnancy-associated plasma protein A (PAPPA), angiotensinogen (AGT), and C3dg. This protein may be involved in antiparasiti…
INF2	-998	chr14:105154669-105155219	550	9	59	-2.3147	4.7496	7.6653	chr14	105155942	105171145	+	NM_032714	inverted formin-2 isoform 3	NP_116103	64423	This gene represents a member of the formin family of proteins. It is considered a diaphanous formin due to the presence of a diaphanous inhibitory domain located at the N-terminus of the encoded protein. Studies of a similar mouse protein indicate that the protein encoded by this locus may function in polymerization and depolymerization of actin filaments. Mutations at this locus have been assoc…
MIRLET7A3	407	chr22:46508785-46509285	500	7	47	-2.3323	4.4188	5.9635	chr22	46508628	46508702	+	NR_029478			406883	microRNAs (miRNAs) are short (20-24 nt) non-coding RNAs that are involved in post-transcriptional regulation of gene expression in multicellular organisms by affecting both the stability and translation of mRNAs. miRNAs are transcribed by RNA polymerase II as part of capped and polyadenylated primary transcripts (pri-miRNAs) that can be either protein-coding or non-coding. The primary transcript …
OR1G1	1843	chr17:3028753-3029251	498	6	41	-2.3428	4.2209	5.5807	chr17	3030845	3029903	-	NM_003555	olfactory receptor 1G1	NP_003546	8390	Olfactory receptors interact with odorant molecules in the nose, to initiate a neuronal response that triggers the perception of a smell. The olfactory receptor proteins are members of a large family of G-protein-coupled receptors (GPCR) arising from single coding-exon genes. Olfactory receptors share a 7-transmembrane domain structure with many neurotransmitter and hormone receptors and are resp…
FAM111A	-1617	chr11:58908460-58908940	480	6	41	-2.3428	4.2209	5.5807	chr11	58910317	58922511	+	NM_001142521	hypothetical protein LOC63901	NP_001135993	63901
KDM4D	1159	chr11:94707721-94708286	565	10	67	-2.3502	4.9123	8.9645	chr11	94706844	94732676	+	NM_018039	lysine-specific demethylase 4D	NP_060509	55693
YKT6	-1175	chr7:44239162-44239642	480	5	35	-2.355	3.9924	4.7259	chr7	44240577	44253893	+	NM_006555	synaptobrevin homolog YKT6	NP_006546	10652	This gene product is one of the SNARE recognition molecules implicated in vesicular transport between secretory compartments. It is a membrane associated, isoprenylated protein that functions at the endoplasmic reticulum-Golgi transport step. This protein is highly conserved from yeast to human and can functionally complement the loss of the yeast homolog in the yeast secretory pathway. [provided…
PSMA5	1549	chr1:109967228-109967814	586	7	48	-2.362	4.4337	6.1815	chr1	109969070	109941652	-	NM_001199772	proteasome subunit alpha type-5 isoform 2	NP_001186701	5686	The proteasome is a multicatalytic proteinase complex with a highly ordered ring-shaped 20S core structure. The core structure is composed of 4 rings of 28 non-identical subunits; 2 rings are composed of 7 alpha subunits and 2 rings are composed of 7 beta subunits. Proteasomes are distributed throughout eukaryotic cells at a high concentration and cleave peptides in an ATP/ubiquitin-dependent pro…
KLHL10	1153	chr17:39994939-39995451	512	6	42	-2.3768	4.2379	5.8052	chr17	39994042	40004599	+	NM_152467	kelch-like protein 10	NP_689680	317719
C18orf25	-1630	chr18:43752101-43752614	513	6	42	-2.3768	4.2379	5.8052	chr18	43753987	43846955	+	NM_001008239	hypothetical protein LOC147339 isoform b	NP_001008240	147339
BICD1	-1485	chr12:32258451-32258948	497	6	42	-2.3768	4.2379	5.8052	chr12	32260184	32531141	+	NM_001003398	protein bicaudal D homolog 1 isoform 2	NP_001003398	636	This gene is one of two human homologs of Drosophila bicaudal-D. It has been implicated in COPI-independent membrane transport from the Golgi apparatus to the endoplasmic reticulum. Two alternative splice variants have been described. Other alternative splice variants that encode different protein isoforms have been described but their full-length nature has not been determined. [provided by RefS…
WDR45	74	chrX:48937225-48937756	531	7	49	-2.3912	4.4483	6.4011	chrX	48937564	48932091	-	NM_001029896	WD repeat domain phosphoinositide-interacting protein 4 isoform 2	NP_001025067	11152	This gene encodes a member of the WD repeat protein family. WD repeats are minimally conserved regions of approximately 40 amino acids typically bracketed by gly-his and trp-asp (GH-WD), which may facilitate formation of heterotrimeric or multiprotein complexes. Members of this family are involved in a variety of cellular processes, including cell cycle progression, signal transduction, apoptosis…
C3orf35	-539	chr3:37440088-37440768	680	9	63	-2.4078	4.7961	8.5573	chr3	37440967	37459865	+	NM_178342	AP20 region protein 1 isoform E	NP_848032	339883
OGG1	-1241	chr3:9790145-9790627	482	6	43	-2.4099	4.2545	6.0313	chr3	9791627	9799089	+	NM_016819	N-glycosylase/DNA lyase isoform 1b	NP_058212	4968	This gene encodes the enzyme responsible for the excision of 8-oxoguanine, a mutagenic base byproduct which occurs as a result of exposure to reactive oxygen. The action of this enzyme includes lyase activity for chain cleavage. Alternative splicing of the C-terminal region of this gene classifies splice variants into two major groups, type 1 and type 2, depending on the last exon of the sequence…
GDA	-893	chr9:74763123-74763628	505	6	43	-2.4099	4.2545	6.0313	chr9	74764268	74867140	+	NM_001242506	guanine deaminase isoform c	NP_001229435	9615	The protein encoded by this gene is an enzyme that catalyzes the hydrolytic deamination of guanine, producing xanthine and ammonia. It is also known as a cytosolic regulator of PSD-95 postsynaptic targeting. [provided by RefSeq, Jul 2008].
RPL13AP6	639	chr10:112695916-112696833	917	10	70	-2.4125	4.9435	9.6412	chr10	112697013	112696360	-	NR_026715			644511
SCNM1	280	chr1:151138537-151139017	480	4	30	-2.4167	3.7459	4.0938	chr1	151138497	151142773	+	NM_001204856	sodium channel modifier 1 isoform 2	NP_001191785	79005	SCNM1 is a zinc finger protein and putative splicing factor. In mice, Scnm1 modifies phenotypic expression of Scn8a (MIM 600702) mutations (Buchner et al., 2003 [PubMed 12920299]).[supplied by OMIM, Oct 2009].
LOC100289187	6	chr7:99195590-99196224	634	7	50	-2.4197	4.4626	6.6223	chr7	99195901	99208456	+	NM_001195543	transmembrane protein 225-like	NP_001182472	100289187
LEFTY2	249	chr1:226128583-226129086	503	10	71	-2.4327	4.9536	9.8687	chr1	226129083	226124297	-	NM_003240	left-right determination factor 2 isoform 1 preproprotein	NP_003231	7044	This gene encodes a member of the TGF-beta family of proteins. The encoded protein is secreted and plays a role in left-right asymmetry determination of organ systems during development. The protein may also play a role in endometrial bleeding. Mutations in this gene have been associated with left-right axis malformations, particularly in the heart and lungs. Some types of infertility have been a…
PIP4K2C	-1534	chr12:57983167-57983647	480	5	37	-2.433	4.0314	5.1736	chr12	57984941	57997211	+	NM_001146260	phosphatidylinositol-5-phosphate 4-kinase type-2 gamma isoform c	NP_001139732	79837
OR2T4	479	chr1:248525121-248525601	480	5	37	-2.433	4.0314	5.1736	chr1	248524882	248525929	+	NM_001004696	olfactory receptor 2T4	NP_001004696	127074	Olfactory receptors interact with odorant molecules in the nose, to initiate a neuronal response that triggers the perception of a smell. The olfactory receptor proteins are members of a large family of G-protein-coupled receptors (GPCR) arising from single coding-exon genes. Olfactory receptors share a 7-transmembrane domain structure with many neurotransmitter and hormone receptors and are resp…
AK2	483	chr1:33501789-33502269	480	5	37	-2.433	4.0314	5.1736	chr1	33502512	33476825	-	NM_001625	adenylate kinase 2, mitochondrial isoform a	NP_001616	204	Adenylate kinases are involved in regulating the adenine nucleotide composition within a cell by catalyzing the reversible transfer of phosphate groups among adenine nucleotides. Three isozymes of adenylate kinase, namely 1, 2, and 3, have been identified in vertebrates; this gene encodes isozyme 2. Expression of these isozymes is tissue-specific and developmentally regulated. Isozyme 2 is locali…
MIR1265	930	chr10:14479212-14479797	585	6	44	-2.4424	4.2707	6.2591	chr10	14478574	14478660	+	NR_031668			100302116	microRNAs (miRNAs) are short (20-24 nt) non-coding RNAs that are involved in post-transcriptional regulation of gene expression in multicellular organisms by affecting both the stability and translation of mRNAs. miRNAs are transcribed by RNA polymerase II as part of capped and polyadenylated primary transcripts (pri-miRNAs) that can be either protein-coding or non-coding. The primary transcript …
TMEM200C	233	chr18:5891601-5892140	539	7	51	-2.4478	4.4766	6.8448	chr18	5892103	5890183	-	NM_001080209	transmembrane protein 200C	NP_001073678	645369
ZNF189	1490	chr9:104162404-104162901	497	6	45	-2.4741	4.2865	6.4883	chr9	104161162	104172942	+	NM_197977	zinc finger protein 189 isoform 2	NP_932094	7743	Kruppel-like zinc finger proteins such as ZNF189 contain a conserved stretch of 7 amino acids that connects a variable number of DNA-binding zinc finger repeats of the cys(2)his(2) (C2H2) type (summarized by Odeberg et al., 1998 [PubMed 9653648]). Approximately 30% of human Kruppel-like zinc finger proteins contain an N-terminal Kruppel-associated box (KRAB) domain. The KRAB domain consists of ap…
FKBP5	1814	chr6:35694279-35694814	535	6	45	-2.4741	4.2865	6.4883	chr6	35696360	35541361	-	NM_001145775	peptidyl-prolyl cis-trans isomerase FKBP5 isoform 1	NP_001139247	2289	The protein encoded by this gene is a member of the immunophilin protein family, which play a role in immunoregulation and basic cellular processes involving protein folding and trafficking. This encoded protein is a cis-trans prolyl isomerase that binds to the immunosuppressants FK506 and rapamycin. It is thought to mediate calcineurin inhibition. It also interacts functionally with mature heter…
ARID3A	-1709	chr19:924057-924598	541	6	45	-2.4741	4.2865	6.4883	chr19	926036	972803	+	NM_005224	AT-rich interactive domain-containing protein 3A	NP_005215	1820	This gene encodes a member of the ARID (AT-rich interaction domain) family of DNA binding proteins. It was found by homology to the Drosophila dead ringer gene, which is important for normal embryogenesis. Other ARID family members have roles in embryonic patterning, cell lineage gene regulation, cell cycle control, transcriptional regulation, and possibly in chromatin structure modification. [pr…
MSGN1	427	chr2:17997900-17998525	625	6	46	-2.5051	4.302	6.719	chr2	17997785	17998367	+	NM_001105569	mesogenin-1	NP_001099039	343930
IRAK1BP1	818	chr6:79577766-79578246	480	4	32	-2.5069	3.791	4.5421	chr6	79577188	79608320	+	NM_001010844	interleukin-1 receptor-associated kinase 1-binding protein 1	NP_001010844	134728
ZMYND15	1963	chr17:4645059-4645539	480	5	39	-2.507	4.0684	5.6288	chr17	4643336	4649407	+	NM_032265	zinc finger MYND domain-containing protein 15 isoform 2	NP_115641	84225
FAM184B	684	chr4:17782211-17782691	480	5	39	-2.507	4.0684	5.6288	chr4	17783135	17633708	-	NM_015688	hypothetical protein LOC27146	NP_056503	27146
C20orf3	-1790	chr20:24974952-24975478	526	7	54	-2.5287	4.517	7.5207	chr20	24973425	24943579	-	NM_020531	adipocyte plasma membrane-associated protein	NP_065392	57136
CSTF2T	1294	chr10:53457791-53458332	541	6	47	-2.5355	4.3172	6.9511	chr10	53459355	53455245	-	NM_015235	cleavage stimulation factor subunit 2 tau variant	NP_056050	23283
POMZP3	1204	chr7:76255176-76255656	480	5	40	-2.5426	4.0862	5.8589	chr7	76256620	76239302	-	NM_012230	POM121 and ZP3 fusion protein isoform 1	NP_036362	22932	This gene appears to have resulted from a fusion of DNA sequences derived from 2 distinct loci, specifically through the duplication of two internal exons from the POM121 gene and four 3' exons from the ZP3 gene. The 5' end of this gene is similar to the 5` coding region of the POM121 gene which encodes an integral nuclear pore membrane protein. However, the protein encoded by this gene lacks the…
NGLY1	1784	chr3:25822961-25823449	488	5	40	-2.5426	4.0862	5.8589	chr3	25824989	25760434	-	NM_001145295	peptide-N(4)-(N-acetyl-beta- glucosaminyl)asparagine amidase isoform 4	NP_001138767	55768	This gene encodes an enzyme that catalyzes hydrolysis of an N(4)-(acetyl-beta-D-glucosaminyl) asparagine residue to N-acetyl-beta-D-glucosaminylamine and a peptide containing an aspartate residue. The encoded enzyme may play a role in the proteasome-mediated degradation of misfolded glycoproteins. Multiple transcript variants encoding different isoforms have been found for this gene.[provided by …
WHSC1	357	chr4:1902469-1902949	480	5	41	-2.5774	4.1036	6.0907	chr4	1902352	1950545	+	NM_133334	probable histone-lysine N-methyltransferase NSD2 isoform 3	NP_579889	7468	This gene encodes a protein that contains four domains present in other developmental proteins: a PWWP domain, an HMG box, a SET domain, and a PHD-type zinc finger. It is expressed ubiquitously in early development. Wolf-Hirschhorn syndrome (WHS) is a malformation syndrome associated with a hemizygous deletion of the distal short arm of chromosome 4. This gene maps to the 165 kb WHS critical regi…
TTC28	-1563	chr22:29077176-29077656	480	4	34	-2.5918	3.8334	4.999	chr22	29075853	28374001	-	NM_001145418	tetratricopeptide repeat protein 28	NP_001138890	23331
FAM166B	-1506	chr9:35565162-35565642	480	4	34	-2.5918	3.8334	4.999	chr9	35563896	35561826	-	NM_001099951	hypothetical protein LOC730112 isoform 2	NP_001093421	730112
WDR61	-1798	chr15:78593495-78593981	486	5	42	-2.6113	4.1206	6.324	chr15	78591940	78575577	-	NM_025234	WD repeat-containing protein 61	NP_079510	80349	WDR61 is a subunit of the human PAF and SKI complexes, which function in transcriptional regulation and are involved in events downstream of RNA synthesis, such as RNA surveillance (Zhu et al., 2005 [PubMed 16024656]).[supplied by OMIM, Mar 2008].
KIAA0141	-1105	chr5:141302039-141302519	480	5	42	-2.6113	4.1206	6.324	chr5	141303384	141321612	+	NM_014773	death ligand signal enhancer precursor	NP_055588	9812
TMSB4X	314	chrX:12993168-12993911	743	8	65	-2.6125	4.7381	9.5322	chrX	12993225	12995346	+	NM_021109	thymosin beta-4	NP_066932	7114	This gene encodes an actin sequestering protein which plays a role in regulation of actin polymerization. The protein is also involved in cell proliferation, migration, and differentiation. This gene escapes X inactivation and has a homolog on chromosome Y. [provided by RefSeq, Jul 2008]. Publication Note: This RefSeq record includes a subset of the publications that are available for this gene. …
MIR4429	-311	chr2:11680861-11681367	506	6	50	-2.6229	4.361	7.6552	chr2	11680803	11680730	-	NR_039627			100616469	microRNAs (miRNAs) are short (20-24 nt) non-coding RNAs that are involved in post-transcriptional regulation of gene expression in multicellular organisms by affecting both the stability and translation of mRNAs. miRNAs are transcribed by RNA polymerase II as part of capped and polyadenylated primary transcripts (pri-miRNAs) that can be either protein-coding or non-coding. The primary transcript …
LOC100289178	-1656	chr1:68296034-68296594	560	7	58	-2.63	4.5677	8.4393	chr1	68297970	68668670	+	NR_040077			100289178
CXCR5	213	chr11:118754447-118754927	480	4	35	-2.6324	3.8537	5.2304	chr11	118754474	118766980	+	NM_001716	C-X-C chemokine receptor type 5 isoform 1	NP_001707	643	This gene encodes a multi-pass membrane protein that belongs to the CXC chemokine receptor family. It is expressed in mature B-cells and Burkitt's lymphoma. This cytokine receptor binds to B-lymphocyte chemoattractant (BLC), and is involved in B-cell migration into B-cell follicles of spleen and Peyer patches. Alternatively spliced transcript variants encoding different isoforms have been describ…
ZNF846	-1813	chr19:9880975-9881472	497	6	51	-2.6509	4.375	7.8923	chr19	9879410	9868150	-	NM_001077624	zinc finger protein 846	NP_001071092	162993
C11orf40	-1162	chr11:4599972-4600453	481	5	45	-2.7086	4.1693	7.0327	chr11	4599050	4592652	-	NM_144663	putative uncharacterized protein C11orf40	NP_653264	143501
LOC400940	1107	chr2:6122976-6123456	480	4	37	-2.7104	3.8927	5.6985	chr2	6122109	6128364	+	NR_026833			400940
IDS	177	chrX:148586236-148587179	943	7	62	-2.7246	4.615	9.3755	chrX	148586884	148568661	-	NM_006123	iduronate 2-sulfatase isoform b precursor	NP_006114	3423	Iduronate-2-sulfatase is required for the lysosomal degradation of heparan sulfate and dermatan sulfate. Mutations in this X-chromosome gene that result in enzymatic deficiency lead to the sex-linked Mucopolysaccharidosis Type II, also known as Hunter Syndrome. Iduronate-2-sulfatase has a strong sequence similarity with human arylsulfatases A, B, and C, and human glucosamine-6-sulfatase. Multiple…
TCAM1P	-193	chr17:61933942-61934422	480	4	38	-2.7479	3.9115	5.9351	chr17	61934375	61941739	+	NR_002947			146771	Members of the immunoglobulin superfamily are found in hundreds of proteins of different functions. Immunoglobulin-like domains may be involved in protein-protein and protein-ligand interactions. This superfamily member is the human ortholog of a testis-specific cell adhesion molecule previously characterized in mouse and rat. The putative membrane protein contains immunoglobulin domains and may …
LRRC71	1949	chr1:156892132-156892612	480	4	38	-2.7479	3.9115	5.9351	chr1	156890423	156902880	+	NM_144702	leucine-rich repeat-containing protein 71	NP_653303	149499
RAD9B	804	chr12:110940391-110941226	835	6	55	-2.7579	4.4284	8.8521	chr12	110940004	110969891	+	NM_152442	cell cycle checkpoint control protein RAD9B	NP_689655	144715
PTPRF	1515	chr1:43997820-43998302	482	5	47	-2.77	4.2	7.5117	chr1	43996546	44089343	+	NM_130440	receptor-type tyrosine-protein phosphatase F isoform 2 precursor	NP_569707	5792	The protein encoded by this gene is a member of the protein tyrosine phosphatase (PTP) family. PTPs are known to be signaling molecules that regulate a variety of cellular processes including cell growth, differentiation, mitotic cycle, and oncogenic transformation. This PTP possesses an extracellular region, a single transmembrane region, and two tandem intracytoplasmic catalytic domains, and th…
DCD	1806	chr12:55040078-55040609	531	6	56	-2.7834	4.4412	9.0947	chr12	55042149	55038374	-	NM_053283	dermcidin preproprotein	NP_444513	117159	This gene encodes a secreted protein that is subsequently processed into mature peptides of distinct biological activities. The C-terminal peptide is constitutively expressed in sweat and has antibacterial and antifungal activities. The N-terminal peptide, also known as diffusible survival evasion peptide, promotes neural cell survival under conditions of severe oxidative stress. A glycosylated f…
ARHGAP24	475	chr4:86700085-86700565	480	4	39	-2.7844	3.9297	6.1732	chr4	86699850	86923823	+	NM_001042669	rho GTPase-activating protein 24 isoform 3	NP_001036134	83478	ARHGAPs, such as ARHGAP24, encode negative regulators of Rho GTPases (see ARHA; MIM 165390), which are implicated in actin remodeling, cell polarity, and cell migration (Katoh and Katoh, 2004 [PubMed 15254788]).[supplied by OMIM, Mar 2008]. Publication Note: This RefSeq record includes a subset of the publications that are available for this gene. Please see the Gene record to access additional p…
LOC728228	1996	chr20:4175215-4176249	1034	11	101	-2.8028	5.271	15.8212	chr20	4173736	4176600	+	NR_033917			728228
SPRY4	-355	chr5:141704735-141705215	480	2	23	-2.8247	3.1726	4.0896	chr5	141704620	141689991	-	NM_001127496	protein sprouty homolog 4 isoform 2	NP_001120968	81848	SPRY4 is an inhibitor of the receptor-transduced mitogen-activated protein kinase (MAPK) signaling pathway. It is positioned upstream of RAS (see HRAS; MIM 190020) activation and impairs the formation of active GTP-RAS (Leeksma et al., 2002 [PubMed 12027893]).[supplied by OMIM, Mar 2008].
GRIN3A	1099	chr9:104499406-104500120	714	4	41	-2.8548	3.9649	6.6539	chr9	104500862	104331633	-	NM_133445	glutamate [NMDA] receptor subunit 3A precursor	NP_597702	116443	This gene encodes a subunit of the N-methyl-D-aspartate (NMDA) receptors, which belong to the superfamily of glutamate-regulated ion channels, and function in physiological and pathological processes in the central nervous system. This subunit shows greater than 90% identity to the corresponding subunit in rat. Studies in the knockout mouse deficient in this subunit suggest that this gene may be …
TPO	-1926	chr2:1415018-1415595	577	5	51	-2.8855	4.2577	8.4837	chr2	1417232	1546499	+	NM_175719	thyroid peroxidase isoform b precursor	NP_783650	7173	This gene encodes a membrane-bound glycoprotein. The encoded protein acts as an enzyme and plays a central role in thyroid gland function. The protein functions in the iodination of tyrosine residues in thyroglobulin and phenoxy-ester formation between pairs of iodinated tyrosines to generate the thyroid hormones, thyroxine and triiodothyronine. Mutations in this gene are associated with several …
TTC33	-305	chr5:40756137-40756617	480	4	42	-2.8887	3.9819	6.8963	chr5	40756072	40711677	-	NM_012382	tetratricopeptide repeat protein 33	NP_036514	23548
UBA6	1323	chr4:68565326-68565806	480	3	35	-2.9719	3.684	5.7971	chr4	68566889	68481478	-	NM_018227	ubiquitin-like modifier-activating enzyme 6	NP_060697	55236	Modification of proteins with ubiquitin (UBB; MIM 191339) or ubiquitin-like proteins controls many signaling networks and requires a ubiquitin-activating enzyme (E1), a ubiquitin conjugating enzyme (E2), and a ubiquitin protein ligase (E3). UBE1L2 is an E1 enzyme that initiates the activation and conjugation of ubiquitin-like proteins (Jin et al., 2007 [PubMed 17597759]).[supplied by OMIM, Mar 20…
SLC18A1	-995	chr8:20041472-20041952	480	3	35	-2.9719	3.684	5.7971	chr8	20040717	20002365	-	NM_001142325	chromaffin granule amine transporter isoform c	NP_001135797	6570	The vesicular monoamine transporter acts to accumulate cytosolic monoamines into vesicles, using the proton gradient maintained across the vesicular membrane. Its proper function is essential to the correct activity of the monoaminergic systems that have been implicated in several human neuropsychiatric disorders. The transporter is a site of action of important drugs, including reserpine and tet…
ZNF449	-1067	chrX:134477386-134477871	485	4	45	-2.986	4.0305	7.631	chrX	134478695	134497338	+	NM_152695	zinc finger protein 449	NP_689908	203523	This gene encodes a nuclear protein that likely functions as a transcription factor. The protein includes an N-terminal SCAN domain, and seven C2H2-type zinc finger motifs. [provided by RefSeq, May 2010].
ARMC3	1253	chr10:23217931-23218481	550	4	45	-2.986	4.0305	7.631	chr10	23216953	23326514	+	NM_173081	armadillo repeat-containing protein 3	NP_775104	219681	Armadillo/beta-catenin (CTNNB1; MIM 116806)-like (ARM) domains are imperfect 45-amino acid repeats involved in protein-protein interactions. ARM domain-containing proteins, such as ARMC3, function in signal transduction, development, cell adhesion and mobility, and tumor initiation and metastasis (Li et al., 2006 [PubMed 16915934]).[supplied by OMIM, Mar 2008].
SERPINA13	953	chr14:95107765-95108264	499	4	46	-3.0171	4.0461	7.8782	chr14	95107061	95113331	+	NR_015340			388007
DGCR14	366	chr22:19131555-19132094	539	4	47	-3.0474	4.0612	8.1265	chr22	19132190	19117791	-	NM_022719	protein DGCR14	NP_073210	8220	This gene is located within the minimal DGS critical region (MDGCR) thought to contain the gene(s) responsible for a group of developmental disorders. These disorders include DiGeorge syndrome, velocardiofacial syndrome, conotruncal anomaly face syndrome, and some familial or sporadic conotruncal cardiac defects which have been associated with microdeletion of 22q11.2. The encoded protein may be …
DHX8	-505	chr17:41560588-41561068	480	3	37	-3.0499	3.723	6.2861	chr17	41561333	41601680	+	NM_004941	ATP-dependent RNA helicase DHX8	NP_004932	1659	DEAD box proteins, characterized by the conserved motif Asp-Glu-Ala-Asp (DEAD), are putative RNA helicases. They are implicated in a number of cellular processes involving alteration of RNA secondary structure such as translation initiation, nuclear and mitochondrial splicing, and ribosome and spliceosome assembly. Based on their distribution patterns, some members of this family are believed to …
ZNF84	-994	chr12:133612643-133613123	480	3	38	-3.0874	3.7417	6.5328	chr12	133613877	133639885	+	NM_003428	zinc finger protein 84	NP_003419	7637
RAMP3	-685	chr7:45196410-45196953	543	4	49	-3.1063	4.0907	8.6262	chr7	45197366	45223850	+	NM_005856	receptor activity-modifying protein 3 precursor	NP_005847	10268	The protein encoded by this gene is a member of the RAMP family of single-transmembrane-domain proteins, called receptor (calcitonin) activity modifying proteins (RAMPs). RAMPs are type I transmembrane proteins with an extracellular N terminus and a cytoplasmic C terminus. RAMPs are required to transport calcitonin-receptor-like receptor (CRLR) to the plasma membrane. CRLR, a receptor with seven …
MNS1	1099	chr15:56755991-56756482	491	3	40	-3.1596	3.7778	7.0301	chr15	56757335	56720928	-	NM_018365	meiosis-specific nuclear structural protein 1	NP_060835	55329	This gene encodes a protein highly similar to the mouse meiosis-specific nuclear structural 1 protein. The mouse protein was shown to be expressed at the pachytene stage during spermatogenesis and may function as a nuclear skeletal protein to regulate nuclear morphology during meiosis. [provided by RefSeq, Oct 2008].
MYLIP	-1660	chr6:16127381-16127931	550	3	43	-3.2614	3.8287	7.7849	chr6	16129316	16148478	+	NM_013262	E3 ubiquitin-protein ligase MYLIP	NP_037394	29116	The ERM protein family members ezrin, radixin, and moesin are cytoskeletal effector proteins linking actin to membrane-bound proteins at the cell surface. Myosin regulatory light chain interacting protein (MYLIP) is a novel ERM-like protein that interacts with myosin regulatory light chain and inhibits neurite outgrowth. [provided by RefSeq, Jul 2008]. Publication Note: This RefSeq record include…
MIR593	-349	chr7:127721313-127721813	500	3	43	-3.2614	3.8287	7.7849	chr7	127721912	127722012	+	NR_030324			693178	microRNAs (miRNAs) are short (20-24 nt) non-coding RNAs that are involved in post-transcriptional regulation of gene expression in multicellular organisms by affecting both the stability and translation of mRNAs. miRNAs are transcribed by RNA polymerase II as part of capped and polyadenylated primary transcripts (pri-miRNAs) that can be either protein-coding or non-coding. The primary transcript …
WRAP53	-1690	chr17:7587458-7587938	480	3	47	-3.387	3.8915	8.8059	chr17	7589388	7606820	+	NM_001143990	telomerase Cajal body protein 1	NP_001137462	55135	This gene encodes an essential component of the telomerase holoenzyme complex, a ribonucleoprotein complex required for telomere synthesis. This protein is enriched in Cajal bodies, nuclear sites of RNP processing that are important for telomerase function. It interacts with dyskerin, TERT and TERC, other components of active telomerase, and with small Cajal body RNAs (scaRNAs), which are involve…
GPSM2	-455	chr1:109418843-109419451	608	3	47	-3.387	3.8915	8.8059	chr1	109419602	109473044	+	NM_013296	G-protein-signaling modulator 2	NP_037428	29899	The protein encoded by this gene belongs to a family of proteins that modulate activation of G proteins, which transduce extracellular signals received by cell surface receptors into integrated cellular responses. The N-terminal half of this protein contains 10 copies of leu-gly-asn (LGN) repeat, and the C-terminal half contains 4 GoLoco motifs, which are involved in guanine nucleotide exchange. …
TYRO3P	-1743	chr15:76553996-76554476	480	2	36	-3.4492	3.4849	7.4479	chr15	76552493	76551629	-	NR_028510			7302
TPK1	1284	chr7:144531622-144532102	480	1	25	-3.5571	2.9219	5.3326	chr7	144533146	144149033	-	NM_001042482	thiamin pyrophosphokinase 1 isoform b	NP_001035947	27010	This gene encodes a protein, that exists as a homodimer, which catalyzes the conversion of thiamine to thiamine pyrophosphate. Alternate transcriptional splice variants, encoding different isoforms, have been characterized. [provided by RefSeq, Jul 2008].
ZNF300P1	337	chr5:150325541-150326077	536	3	55	-3.6094	4.0027	10.8886	chr5	150326146	150309997	-	NR_026867			134466
SNORD62B	546	chr9:134366159-134366678	519	4	71	-3.6324	4.3537	14.3288	chr9	134365872	134365958	+	NR_003050			692093
SNORD62A	546	chr9:134366159-134366678	519	4	71	-3.6324	4.3537	14.3288	chr9	134365872	134365958	+	NR_002914			26786
USP17L2	1765	chr8:11994248-11994760	512	6	115	-3.8085	4.9537	24.4744	chr8	11996269	11994676	-	NM_201402	ubiquitin carboxyl-terminal hydrolase 17-like protein 2	NP_958804	377630	DUB3 is a member of the ubiquitin processing protease (UBP) subfamily of deubiquitinating enzymes. See USP1 (MIM 603478) for background information.[supplied by OMIM, Mar 2008]. Sequence Note: The RefSeq transcript and protein were derived from genomic sequence to make the sequence consistent with the reference genome assembly. The genomic coordinates used for the transcript record were based on …
STARD8	-300	chrX:67866912-67867508	596	2	47	-3.8247	3.6726	10.424	chrX	67867510	67945684	+	NM_014725	stAR-related lipid transfer protein 8 isoform b	NP_055540	9754	This gene encodes a member of a subfamily of Rho GTPase activating proteins that contain a steroidogenic acute regulatory protein related lipid transfer domain. The encoded protein localizes to focal adhesions and may be involved in regulating cell morphology. This protein may also function as a tumor suppressor. [provided by RefSeq, Mar 2010].
SP1	-1113	chr12:53772625-53773105	480	1	33	-3.9442	3.1154	7.5077	chr12	53773978	53810226	+	NM_138473	transcription factor Sp1 isoform a	NP_612482	6667
INPP5F	1021	chr10:121486339-121486819	480	1	37	-4.1046	3.1956	8.6152	chr10	121485558	121551720	+	NM_001243195	phosphatidylinositide phosphatase SAC2 isoform 3	NP_001230124	22876	The protein encoded by this gene is an inositol 1,4,5-trisphosphate (InsP3) 5-phosphatase and contains a Sac domain. The activity of this protein is specific for phosphatidylinositol 4,5-bisphosphate and phosphatidylinositol 3,4,5-trisphosphate. Alternatively spliced transcript variants encoding multiple isoforms have been observed for this gene. [provided by RefSeq, Aug 2011].
MRPS9	631	chr2:105654840-105655386	546	1	40	-4.2143	3.2504	9.4523	chr2	105654482	105716418	+	NM_182640	28S ribosomal protein S9, mitochondrial precursor	NP_872578	64965	Mammalian mitochondrial ribosomal proteins are encoded by nuclear genes and help in protein synthesis within the mitochondrion. Mitochondrial ribosomes (mitoribosomes) consist of a small 28S subunit and a large 39S subunit. They have an estimated 75% protein to rRNA composition compared to prokaryotic ribosomes, where this ratio is reversed. Another difference between mammalian mitoribosomes and …
CLUAP1	744	chr16:3560211-3561064	853	2	68	-4.3483	3.9344	16.2768	chr16	3559893	3587669	+	NM_024793	clusterin-associated protein 1 isoform 2	NP_079069	23059
SLC35B2	608	chr6:44224366-44224984	618	1	44	-4.3486	3.3176	10.5755	chr6	44225283	44221837	-	NM_178148	adenosine 3'-phospho 5'-phosphosulfate transporter 1	NP_835361	347734	Sulfotransferases (e.g., SULT4A1; MIM 608359) use an activated form of sulfate, 3-prime-phosphoadenosine 5-prime-phosphosulfate (PAPS), as a common sulfate donor for sulfation of glycoproteins, proteoglycans, and glycolipids in the endoplasmic reticulum and Golgi apparatus. SLC35B2 is located in the microsomal membrane and transports PAPS from the cytosol, where it is synthesized, into the Golgi …
MKRN3	1887	chr15:23812100-23812580	480	1	47	-4.4417	3.3641	11.4226	chr15	23810453	23813166	+	NM_005664	probable E3 ubiquitin-protein ligase makorin-3	NP_005655	7681	The protein encoded by this gene contains a RING (C3HC4) zinc finger motif and several C3H zinc finger motifs. This gene is intronless and imprinted, with expression only from the paternal allele. Disruption of the imprinting at this locus may contribute to Prader-Willi syndrome. An antisense RNA of unknown function has been found overlapping this gene. [provided by RefSeq, Jul 2008].
SPAG11B	1519	chr8:7308110-7308627	517	1	48	-4.4714	3.379	11.7057	chr8	7309887	7308085	-	NM_058206	sperm-associated antigen 11B isoform B precursor	NP_478113	10407	This gene encodes several androgen-dependent, epididymis-specific secretory proteins. The specific functions of these proteins have not been determined, but they are thought to be involved in sperm maturation. Some of the isoforms contain regions of similarity to beta-defensins, a family of antimicrobial peptides. The gene is located on chromosome 8p23 near the defensin gene cluster. Alternative …
JAZF1	-498	chr7:28220695-28221175	480	0	23	-4.4964	2.3368	5.7204	chr7	28220437	27870192	-	NM_175061	juxtaposed with another zinc finger protein 1	NP_778231	221895	This gene encodes a nuclear protein with three C2H2-type zinc fingers, and functions as a transcriptional repressor. Chromosomal aberrations involving this gene are associated with endometrial stromal tumors. Alternatively spliced variants which encode different protein isoforms have been described; however, not all variants have been fully characterized [provided by RefSeq, Jul 2008]. Publicatio…
WARS2	-1646	chr1:119684701-119685181	480	0	36	-5.1208	2.649	9.4426	chr1	119683295	119573838	-	NM_201263	tryptophanyl-tRNA synthetase, mitochondrial isoform 2 precursor	NP_957715	10352	Aminoacyl-tRNA synthetases catalyze the aminoacylation of tRNA by their cognate amino acid. Because of their central role in linking amino acids with nucleotide triplets contained in tRNAs, aminoacyl-tRNA synthetases are thought to be among the first proteins that appeared in evolution. Two forms of tryptophanyl-tRNA synthetase exist, a cytoplasmic form, named WARS, and a mitochondrial form, name…
DPYSL3	-1029	chr5:146890399-146890898	499	0	45	-5.435	2.8061	12.0561	chr5	146889619	146770370	-	NM_001197294	dihydropyrimidinase-related protein 3 isoform 1	NP_001184223	1809

## Sheet: S3_DM Vs Control (hyper)
Diabetes Vs Control hypermethylated DMRs in promoter (by MANorm) Column A: GeneName, the name of DMR-associated gene. Column B: DMR_To_TSS, the distance of DMR (middle position) to TSS. Positive value indicates downstream, and negative value indicates upstream. Column C: DMR_Locus, the genomic locus of DMR. Column D: DMR_Length, the length of DMR. Column E ~ F: RawTagCount, raw tag count of each …
GeneName	DMR_To_TSS	DMR_Locus	DMR_Length	RawTagCount_Diabetes	RawTagCount_Control	M_value_rescaled	A_value_rescaled	"-log10(p-value)"	Genechrom	GeneTSS	GeneTTS	Strand	Accession	ProteinName	ProteinID	GeneID	mRNADescription
SAMSN1	802	chr21:15917517-15918207	690	59	1	5.0894	3.5447	18.8021	chr21	15918664	15857548	-	NM_022136	SAM domain-containing protein SAMSN-1	NP_071419	64092	SAMSN1 is a member of a novel gene family of putative adaptors and scaffold proteins containing SH3 and SAM (sterile alpha motif) domains (Claudio et al., 2001 [PubMed 11536050]).[supplied by OMIM, Mar 2008].
ROS1	1530	chr6:117745248-117745728	480	55	1	4.9895	3.4947	17.6241	chr6	117747018	117609529	-	NM_002944	proto-oncogene tyrosine-protein kinase ROS precursor	NP_002935	6098	This proto-oncogene, highly-expressed in a variety of tumor cell lines, belongs to the sevenless subfamily of tyrosine kinase insulin receptor genes. The protein encoded by this gene is a type I integral membrane protein with tyrosine kinase activity. The protein may function as a growth or differentiation factor receptor. [provided by RefSeq, Jul 2008]. Publication Note: This RefSeq record inclu…
MIR2277	1170	chr5:92955084-92955564	480	55	1	4.9895	3.4947	17.6241	chr5	92956494	92956401	-	NR_031754			100313887	microRNAs (miRNAs) are short (20-24 nt) non-coding RNAs that are involved in post-transcriptional regulation of gene expression in multicellular organisms by affecting both the stability and translation of mRNAs. miRNAs are transcribed by RNA polymerase II as part of capped and polyadenylated primary transcripts (pri-miRNAs) that can be either protein-coding or non-coding. The primary transcript …
GPR156	-663	chr3:119963565-119964045	480	49	1	4.8253	3.4127	15.5668	chr3	119963142	119884327	-	NM_153002	probable G-protein coupled receptor 156 isoform 1	NP_694547	165829	G protein-coupled receptors (GPCRs) are a large superfamily of cell surface receptors characterized by 7 helical transmembrane domains, together with N-terminal extracellular and C-terminal intracellular domains.[supplied by OMIM, Mar 2008].
ASAH1	421	chr8:17941218-17941698	480	49	1	4.8253	3.4127	15.5668	chr8	17941879	17913924	-	NM_177924	acid ceramidase isoform a preproprotein	NP_808592	427	This gene encodes a heterodimeric protein consisting of a nonglycosylated alpha subunit and a glycosylated beta subunit that is cleaved to the mature enzyme posttranslationally. The encoded protein catalyzes the synthesis and degradation of ceramide into sphingosine and fatty acid. Mutations in this gene have been associated with a lysosomal storage disorder known as Farber disease. Multiple tran…
GHRLOS2	-1895	chr3:10323777-10324637	860	98	3	4.8149	4.4074	29.1726	chr3	10326102	10327430	+	NR_026829			84657
TP63	1558	chr3:189508766-189509246	480	47	1	4.7662	3.3831	14.687	chr3	189507448	189599284	+	NM_001114982	tumor protein 63 isoform 6	NP_001108454	8626	This gene encodes a member of the p53 family of transcription factors. An animal model, p63 -/- mice, has been useful in defining the role this protein plays in the development and maintenance of stratified epithelial tissues. p63 -/- mice have several developmental defects which include the lack of limbs and other tissues, such as teeth and mammary glands, which develop as a result of interactio…
ATMIN	834	chr16:81070051-81070531	480	44	1	4.6727	3.3363	13.8085	chr16	81069457	81080951	+	NM_015251	ATM interactor	NP_056066	23300
SH2D2A	-1678	chr1:156788078-156788559	481	42	1	4.6068	3.3034	13.2236	chr1	156786640	156776034	-	NM_001161442	SH2 domain-containing protein 2A isoform 3	NP_001154914	9047	This gene encodes an adaptor protein thought to function in T-cell signal transduction. A related protein in mouse is responsible for the activation of lymphocyte-specific protein-tyrosine kinase and functions in downstream signaling. Alternative splicing results in multiple transcript variants. [provided by RefSeq, Mar 2010].
LOC100506134	-1236	chr2:166788791-166789470	679	42	1	4.6068	3.3034	13.2236	chr2	166790366	166804831	+	NR_038984			100506134
CPB1	932	chr3:148546279-148546759	480	41	1	4.5727	3.2864	12.9315	chr3	148545587	148577972	+	NM_001871	carboxypeptidase B preproprotein	NP_001862	1360	Three different procarboxypeptidases A and two different procarboxypeptidases B have been isolated. The B1 and B2 forms differ from each other mainly in isoelectric point. Carboxypeptidase B1 is a highly tissue-specific protein and is a useful serum marker for acute pancreatitis and dysfunction of pancreatic transplants. It is not elevated in pancreatic carcinoma. [provided by RefSeq, Jul 2008]. …
RAP1GDS1	1105	chr4:99183391-99183871	480	38	1	4.4654	3.2327	11.7647	chr4	99182526	99365012	+	NM_001100430	rap1 GTPase-GDP dissociation stimulator 1 isoform 6	NP_001093900	5910	The smg GDP dissociation stimulator (smgGDS) protein is a stimulatory GDP/GTP exchange protein with GTPase activity (Riess et al., 1993 [PubMed 8262526]).[supplied by OMIM, Feb 2010].
MYH13	11	chr17:10276044-10276578	534	38	1	4.4654	3.2327	11.7647	chr17	10276322	10204182	-	NM_003802	myosin-13	NP_003793	8735
FAM184A	25	chr6:119470087-119470579	492	38	1	4.4654	3.2327	11.7647	chr6	119470358	119280995	-	NM_001100411	hypothetical protein LOC79632 isoform 2	NP_001093881	79632
C20orf196	231	chr20:5731033-5731513	480	38	1	4.4654	3.2327	11.7647	chr20	5731042	5844559	+	NM_152504	hypothetical protein LOC149840	NP_689717	149840
C1orf180	-801	chr1:85101264-85101744	480	38	1	4.4654	3.2327	11.7647	chr1	85100703	85093912	-	NR_027379			439927
SOX6	993	chr11:16429197-16429677	480	37	1	4.4278	3.2139	11.4736	chr11	16430430	15987994	-	NM_001145811	transcription factor SOX-6 isoform 3	NP_001139283	55553	This gene encodes a member of the D subfamily of sex determining region y-related transcription factors that are characterized by a conserved DNA-binding domain termed the high mobility group box and by their ability to bind the minor groove of DNA. The encoded protein is a transcriptional activator that is required for normal development of the central nervous system, chondrogenesis and maintena…
FGFBP1	-1075	chr4:15940806-15941286	480	36	1	4.3891	3.1946	11.1826	chr4	15939971	15937192	-	NM_005130	fibroblast growth factor-binding protein 1	NP_005121	9982	FGFBP1, or HBP17, binds to both acidic (FGF1; MIM 131220) and basic (FGF2; MIM 134920) fibroblast growth factors in a reversible manner. It also binds to perlecan (HSPG2; MIM 142461).[supplied by OMIM]. Publication Note: This RefSeq record includes a subset of the publications that are available for this gene. Please see the Entrez Gene record to access additional publications.
AADAC	17	chr3:151531637-151532117	480	36	1	4.3891	3.1946	11.1826	chr3	151531860	151546276	+	NM_001086	arylacetamide deacetylase	NP_001077	13	Microsomal arylacetamide deacetylase competes against the activity of cytosolic arylamine N-acetyltransferase, which catalyzes one of the initial biotransformation pathways for arylamine and heterocyclic amine carcinogens [provided by RefSeq, Jul 2008]. Publication Note: This RefSeq record includes a subset of the publications that are available for this gene. Please see the Gene record to access…
LOC391322	-1868	chr22:24371003-24371493	490	54	2	4.3784	3.7742	15.7018	chr22	24373116	24374043	+	NM_001144931	D-dopachrome decarboxylase related protein	NP_001138403	391322
P2RY14	866	chr3:150965892-150966372	480	35	1	4.3494	3.1747	10.892	chr3	150966998	150929904	-	NM_001081455	P2Y purinoceptor 14	NP_001074924	9934	The product of this gene belongs to the family of G-protein coupled receptors, which contains several receptor subtypes with different pharmacological selectivity for various adenosine and uridine nucleotides. This receptor is a P2Y purinergic receptor for UDP-glucose and other UDP-sugars coupled to G-proteins. It has been implicated in extending the known immune system functions of P2Y receptors…
EFHC2	1689	chrX:44200994-44201474	480	35	1	4.3494	3.1747	10.892	chrX	44202923	44007127	-	NM_025184	EF-hand domain-containing family member C2	NP_079460	80258	This gene encodes a protein which contains three DM10 domains and three calcium-binding EF-hand motifs. A related protein is encoded by a gene on chromosome 6. It has been suggested that both proteins are involved in the development of epilepsy (PMID: 15258581, 16112844) and that this gene may be associated with fear recognition in individuals with Turner syndrome. [provided by RefSeq, Aug 2011].
GCG	545	chr2:163008129-163008609	480	52	2	4.3248	3.7473	15.1277	chr2	163008914	162999384	-	NM_002054	glucagon preproprotein	NP_002045	2641	The protein encoded by this gene is actually a preproprotein that is cleaved into four distinct mature peptides. One of these, glucagon, is a pancreatic hormone that counteracts the glucose-lowering action of insulin by stimulating glycogenolysis and gluconeogenesis. Glucagon is a ligand for a specific G-protein linked receptor whose signalling pathway controls cell proliferation. Two of the othe…
MRPL47	1141	chr3:179321053-179321533	480	34	1	4.3086	3.1543	10.6015	chr3	179322434	179306254	-	NM_177988	39S ribosomal protein L47, mitochondrial isoform b	NP_817125	57129	Mammalian mitochondrial ribosomal proteins are encoded by nuclear genes and help in protein synthesis within the mitochondrion. Mitochondrial ribosomes (mitoribosomes) consist of a small 28S subunit and a large 39S subunit. They have an estimated 75% protein to rRNA composition compared to prokaryotic ribosomes, where this ratio is reversed. Another difference between mammalian mitoribosomes and …
C8orf12	-399	chr8:11225271-11225751	480	34	1	4.3086	3.1543	10.6015	chr8	11225910	11296166	+	NR_026814			83656
LOC100128505	-187	chr9:119266009-119266739	730	68	3	4.2919	4.146	19.1119	chr9	119266561	119324572	+	NR_033973			100128505
STK33	-209	chr11:8615472-8615952	480	33	1	4.2666	3.1333	10.0215	chr11	8615503	8413417	-	NM_030906	serine/threonine-protein kinase 33	NP_112168	65975
SLC28A3	-1174	chr9:86984347-86984827	480	33	1	4.2666	3.1333	10.0215	chr9	86983413	86890764	-	NM_022127	solute carrier family 28 member 3	NP_071410	64078	Nucleoside transporters, such as SLC28A3, regulate multiple cellular processes, including neurotransmission, vascular tone, adenosine concentration in the vicinity of cell surface receptors, and transport and metabolism of nucleoside drugs. SLC28A3 shows broad specificity for pyrimidine and purine nucleosides (Ritzel et al., 2001 [PubMed 11032837]).[supplied by OMIM, Mar 2008].
MID1	-851	chrX:10545568-10546048	480	33	1	4.2666	3.1333	10.0215	chrX	10544957	10413349	-	NM_001193277	midline-1 isoform 1	NP_001180206	4281	The protein encoded by this gene is a member of the tripartite motif (TRIM) family, also known as the 'RING-B box-coiled coil' (RBCC) subgroup of RING finger proteins. The TRIM motif includes three zinc-binding domains, a RING, a B-box type 1 and a B-box type 2, and a coiled-coil region. This protein forms homodimers which associate with microtubules in the cytoplasm. The protein is likely involv…
HLA-A	-313	chr6:29909693-29910173	480	33	1	4.2666	3.1333	10.0215	chr6	29910246	29913661	+	NM_002116	HLA class I histocompatibility antigen, A-1 alpha chain precursor	NP_002107	3105	HLA-A belongs to the HLA class I heavy chain paralogues. This class I molecule is a heterodimer consisting of a heavy chain and a light chain (beta-2 microglobulin). The heavy chain is anchored in the membrane. Class I molecules play a central role in the immune system by presenting peptides derived from the endoplasmic reticulum lumen. They are expressed in nearly all cells. The heavy chain is a…
AGPAT4	220	chr6:161694647-161695127	480	33	1	4.2666	3.1333	10.0215	chr6	161695107	161551056	-	NM_020133	1-acyl-sn-glycerol-3-phosphate acyltransferase delta	NP_064518	56895	This gene encodes a member of the 1-acylglycerol-3-phosphate O-acyltransferase family. This integral membrane protein converts lysophosphatidic acid to phosphatidic acid, the second step in de novo phospholipid biosynthesis. [provided by RefSeq, Jul 2008].
CRYBB2P1	1234	chr22:25845047-25845527	480	49	2	4.2404	3.7051	14.2685	chr22	25844053	25857645	+	NR_033734			1416
WDR91	-281	chr7:134896357-134896837	480	32	1	4.2234	3.1117	9.7319	chr7	134896316	134868589	-	NM_014149	WD repeat-containing protein 91	NP_054868	29062
KLRK1	-1320	chr12:10543733-10544213	480	32	1	4.2234	3.1117	9.7319	chr12	10542653	10524951	-	NM_007360	NKG2-D type II integral membrane protein	NP_031386	22914	Natural killer (NK) cells are lymphocytes that can mediate lysis of certain tumor cells and virus-infected cells without previous activation. They can also regulate specific humoral and cell-mediated immunity. NK cells preferentially express several calcium-dependent (C-type) lectins, which have been implicated in the regulation of NK cell function. The NKG2 gene family is located within the NK c…
COMMD10	897	chr5:115421383-115421863	480	32	1	4.2234	3.1117	9.7319	chr5	115420726	115628978	+	NM_016144	COMM domain-containing protein 10	NP_057228	51397
TMEM202	1667	chr15:72692094-72692574	480	48	2	4.2111	3.6905	13.9825	chr15	72690667	72700708	+	NM_001080462	transmembrane protein 202	NP_001073931	338949
LOC100287632	-1502	chr6:119102128-119102608	480	31	1	4.1788	3.0894	9.4426	chr6	119103870	119104581	+	NR_037662			100287632
DCLK1	-596	chr13:36430354-36430834	480	31	1	4.1788	3.0894	9.4426	chr13	36429998	36420036	-	NM_001195430	serine/threonine-protein kinase DCLK1 isoform 4	NP_001182359	9201	This gene encodes a member of the protein kinase superfamily and the doublecortin family. The protein encoded by this gene contains two N-terminal doublecortin domains, which bind microtubules and regulate microtubule polymerization, a C-terminal serine/threonine protein kinase domain, which shows substantial homology to Ca2+/calmodulin-dependent protein kinase, and a serine/proline-rich domain i…
CCL18	1716	chr17:34393118-34393598	480	31	1	4.1788	3.0894	9.4426	chr17	34391642	34398841	+	NM_002988	C-C motif chemokine 18 precursor	NP_002979	6362	This gene is one of several Cys-Cys (CC) cytokine genes clustered on the q arm of chromosome 17. Cytokines are a family of secreted proteins involved in immunoregulatory and inflammatory processes. The CC cytokines are proteins characterized by two adjacent cysteines. The cytokine encoded by this gene displays chemotactic activity for naive T cells, CD4+ and CD8+ T cells and nonactivated lymphocy…
OR13D1	-493	chr9:107455969-107456449	480	46	2	4.1507	3.6603	13.1264	chr9	107456702	107457743	+	NM_001004484	olfactory receptor 13D1	NP_001004484	286365	Olfactory receptors interact with odorant molecules in the nose, to initiate a neuronal response that triggers the perception of a smell. The olfactory receptor proteins are members of a large family of G-protein-coupled receptors (GPCR) arising from single coding-exon genes. Olfactory receptors share a 7-transmembrane domain structure with many neurotransmitter and hormone receptors and are resp…
MIR1293	-407	chr12:50628162-50628642	480	30	1	4.1328	3.0664	9.1536	chr12	50627995	50627924	-	NR_031625			100302220	microRNAs (miRNAs) are short (20-24 nt) non-coding RNAs that are involved in post-transcriptional regulation of gene expression in multicellular organisms by affecting both the stability and translation of mRNAs. miRNAs are transcribed by RNA polymerase II as part of capped and polyadenylated primary transcripts (pri-miRNAs) that can be either protein-coding or non-coding. The primary transcript …
IL36A	1379	chr2:113764587-113765067	480	30	1	4.1328	3.0664	9.1536	chr2	113763448	113765621	+	NM_014440	interleukin-36 alpha	NP_055255	27179
GPX5	350	chr6:28493898-28494378	480	30	1	4.1328	3.0664	9.1536	chr6	28493788	28502728	+	NM_003996	epididymal secretory glutathione peroxidase isoform 2 precursor	NP_003987	2880	This gene belongs to the glutathione peroxidase family. It is specifically expressed in the epididymis in the mammalian male reproductive tract, and is androgen-regulated. Unlike mRNAs for other characterized glutathione peroxidases, this mRNA does not contain a selenocysteine (UGA) codon. Thus, the encoded protein is selenium-independent, and has been proposed to play a role in protecting the me…
TRIM4	-1002	chr7:99517985-99518465	480	45	2	4.1196	3.6447	12.8416	chr7	99517223	99488029	-	NM_033091	tripartite motif-containing protein 4 isoform beta	NP_149082	89122	The protein encoded by this gene is a member of the tripartite motif (TRIM) family. The TRIM motif includes three zinc-binding domains, a RING, a B-box type 1 and a B-box type 2, and a coiled-coil region. The protein localizes to cytoplasmic bodies. Its function has not been identified. Alternatively spliced transcript variants that encode different isoforms have been described.[provided by RefSe…
B3GALT4	-303	chr6:33244288-33244938	650	59	3	4.0894	4.0447	16.2768	chr6	33244916	33246602	+	NM_003782	beta-1,3-galactosyltransferase 4	NP_003773	8705	This gene is a member of the beta-1,3-galactosyltransferase (beta3GalT) gene family. This family encodes type II membrane-bound glycoproteins with diverse enzymatic functions using different donor substrates (UDP-galactose and UDP-N-acetylglucosamine) and different acceptor sugars (N-acetylglucosamine, galactose, N-acetylgalactosamine). The beta3GalT genes are distantly related to the Drosophila …
JPX	-1598	chrX:73162320-73162800	480	44	2	4.0877	3.6288	12.5571	chrX	73164158	73290217	+	NR_024582			554203	JPX is a nonprotein-coding RNA transcribed from a gene within the X-inactivation center (XIC; MIM 314670) that appears to participate in X chromosome inactivation (Tian et al., 2010 [PubMed 21029862]).[supplied by OMIM, Feb 2011].
SNORA25	1158	chr11:93462414-93462894	480	29	1	4.0853	3.0427	8.865	chr11	93463812	93463680	-	NR_003028			684959
SCARNA9L	-790	chrX:20155081-20155561	480	29	1	4.0853	3.0427	8.865	chrX	20154531	20154183	-	NR_023358			100158262
PWRN2	-837	chr15:24415650-24416130	480	29	1	4.0853	3.0427	8.865	chr15	24415053	24409925	-	NR_026647			791115
MIR129-1	674	chr7:127848358-127848838	480	29	1	4.0853	3.0427	8.865	chr7	127847924	127847996	+	NR_029596			406917	microRNAs (miRNAs) are short (20-24 nt) non-coding RNAs that are involved in post-transcriptional regulation of gene expression in multicellular organisms by affecting both the stability and translation of mRNAs. miRNAs are transcribed by RNA polymerase II as part of capped and polyadenylated primary transcripts (pri-miRNAs) that can be either protein-coding or non-coding. The primary transcript …
LOC100507062	-377	chr3:63989080-63989560	480	29	1	4.0853	3.0427	8.865	chr3	63989697	63997917	+	NR_038286			100507062
GATA6	-1317	chr18:19747858-19748338	480	29	1	4.0853	3.0427	8.865	chr18	19749415	19782227	+	NM_005257	transcription factor GATA-6	NP_005248	2627
SLC35F5	1610	chr2:114512550-114513030	480	43	2	4.0552	3.6125	12.273	chr2	114514400	114471932	-	NM_025181	solute carrier family 35 member F5	NP_079457	80255
SIAH3	-980	chr13:46426586-46427066	480	43	2	4.0552	3.6125	12.273	chr13	46425846	46354415	-	NM_198849	seven in absentia homolog 3	NP_942146	283514
MIR708	-898	chr11:79113811-79114291	480	43	2	4.0552	3.6125	12.273	chr11	79113153	79113065	-	NR_030598			100126333	microRNAs (miRNAs) are short (20-24 nt) non-coding RNAs that are involved in post-transcriptional regulation of gene expression in multicellular organisms by affecting both the stability and translation of mRNAs. miRNAs are transcribed by RNA polymerase II as part of capped and polyadenylated primary transcripts (pri-miRNAs) that can be either protein-coding or non-coding. The primary transcript …
UBTF	372	chr17:42297638-42298118	480	28	1	4.0362	3.0181	8.5767	chr17	42298250	42282400	-	NM_001076683	nucleolar transcription factor 1 isoform b	NP_001070151	7343	This gene encodes a member of the HMG-box DNA-binding protein family. The encoded protein plays a critical role in ribosomal RNA transcription as a key component of the pre-initiation complex, mediating the recruitment of RNA polymerase I to rDNA promoter regions. The encoded protein may also play important roles in chromatin remodeling and pre-rRNA processing, and its activity is regulated by bo…
SNRNP48	-531	chr6:7589660-7590140	480	28	1	4.0362	3.0181	8.5767	chr6	7590431	7612200	+	NM_152551	U11/U12 small nuclear ribonucleoprotein 48 kDa protein	NP_689764	154007
NOTCH4	-1056	chr6:32192660-32193140	480	28	1	4.0362	3.0181	8.5767	chr6	32191844	32162619	-	NM_004557	neurogenic locus notch homolog protein 4 preproprotein	NP_004548	4855	This gene encodes a member of the Notch family. Members of this Type 1 transmembrane protein family share structural characteristics including an extracellular domain consisting of multiple epidermal growth factor-like (EGF) repeats, and an intracellular domain consisting of multiple, different domain types. Notch family members play a role in a variety of developmental processes by controlling c…
MIR548AJ2	-1924	chr4:23466410-23466890	480	28	1	4.0362	3.0181	8.5767	chr4	23464726	23199716	-	NR_039674			100616252	microRNAs (miRNAs) are short (20-24 nt) non-coding RNAs that are involved in post-transcriptional regulation of gene expression in multicellular organisms by affecting both the stability and translation of mRNAs. miRNAs are transcribed by RNA polymerase II as part of capped and polyadenylated primary transcripts (pri-miRNAs) that can be either protein-coding or non-coding. The primary transcript …
HK2	-1952	chr2:75057589-75058069	480	28	1	4.0362	3.0181	8.5767	chr2	75059781	75120481	+	NM_000189	hexokinase-2	NP_000180	3099	Hexokinases phosphorylate glucose to produce glucose-6-phosphate, the first step in most glucose metabolism pathways. This gene encodes hexokinase 2, the predominant form found in skeletal muscle. It localizes to the outer membrane of mitochondria. Expression of this gene is insulin-responsive, and studies in rat suggest that it is involved in the increased rate of glycolysis seen in rapidly grow…
SP140	-793	chr2:231089411-231089891	480	42	2	4.0219	3.5959	11.9891	chr2	231090444	231103791	+	NM_001005176	nuclear body protein SP140 isoform 2	NP_001005176	11262
SP110	793	chr2:231089411-231089891	480	42	2	4.0219	3.5959	11.9891	chr2	231090444	231041188	-	NM_001185015	sp110 nuclear body protein isoform d	NP_001171944	3431	The nuclear body is a multiprotein complex that may have a role in the regulation of gene transcription. This gene is a member of the SP100/SP140 family of nuclear body proteins and encodes a leukocyte-specific nuclear body component. The protein can function as an activator of gene transcription and may serve as a nuclear hormone receptor coactivator. In addition, it has been suggested that the …
ISL1	-1586	chr5:50677131-50677611	480	41	2	3.9878	3.5789	11.7057	chr5	50678957	50690563	+	NM_002202	insulin gene enhancer protein ISL-1	NP_002193	3670	This gene encodes a member of the LIM/homeodomain family of transcription factors. The encoded protein binds to the enhancer region of the insulin gene, among others, and may play an important role in regulating insulin gene expression. The encoded protein is central to the development of pancreatic cell lineages and may also be required for motor neuron generation. Mutations in this gene have be…
SYNJ2	1085	chr6:158403732-158404212	480	27	1	3.9854	2.9927	8.2889	chr6	158402887	158520207	+	NM_003898	synaptojanin-2 isoform 1	NP_003889	8871	The gene is a member of the inositol-polyphosphate 5-phosphatase family. The encoded protein interacts with the ras-related C3 botulinum toxin substrate 1, which causes translocation of the encoded protein to the plasma membrane where it inhibits clathrin-mediated endocytosis. Alternative splicing results in multiple transcript variants. [provided by RefSeq, May 2010].
SLC38A1	-1854	chr12:46664822-46665302	480	27	1	3.9854	2.9927	8.2889	chr12	46663208	46576840	-	NM_030674	sodium-coupled neutral amino acid transporter 1	NP_109599	81539	Amino acid transporters play essential roles in the uptake of nutrients, production of energy, chemical metabolism, detoxification, and neurotransmitter cycling. SLC38A1 is an important transporter of glutamine, an intermediate in the detoxification of ammonia and the production of urea. Glutamine serves as a precursor for the synaptic transmitter, glutamate (Gu et al., 2001 [PubMed 11325958]).[s…
SCARNA20	-1301	chr17:58310067-58310547	480	27	1	3.9854	2.9927	8.2889	chr17	58309006	58308876	-	NR_002999			677681
CLEC12A	-502	chr12:10103172-10103652	480	27	1	3.9854	2.9927	8.2889	chr12	10103914	10138194	+	NM_001207010	C-type lectin domain family 12 member A isoform 3	NP_001193939	160364	This gene encodes a member of the C-type lectin/C-type lectin-like domain (CTL/CTLD) superfamily. Members of this family share a common protein fold and have diverse functions, such as cell adhesion, cell-cell signaling, glycoprotein turnover, and roles in inflammation and immune response. The protein encoded by this gene is a negative regulator of granulocyte and monocyte function. Several alter…
TXK	1868	chr4:48134165-48134645	480	40	2	3.9529	3.5614	11.1398	chr4	48136273	48068409	-	NM_003328	tyrosine-protein kinase TXK	NP_003319	7294
SLA	1152	chr8:134113918-134114398	480	26	1	3.9327	2.9663	8.0014	chr8	134115310	134048972	-	NM_001045556	src-like-adapter isoform a	NP_001039021	6503
SIT1	1055	chr9:35649652-35650132	480	26	1	3.9327	2.9663	8.0014	chr9	35650947	35649296	-	NM_014450	signaling threshold-regulating transmembrane adapter 1 precursor	NP_055265	27240
MIR4432	807	chr2:60613533-60614013	480	26	1	3.9327	2.9663	8.0014	chr2	60614580	60614496	-	NR_039631			100616473	microRNAs (miRNAs) are short (20-24 nt) non-coding RNAs that are involved in post-transcriptional regulation of gene expression in multicellular organisms by affecting both the stability and translation of mRNAs. miRNAs are transcribed by RNA polymerase II as part of capped and polyadenylated primary transcripts (pri-miRNAs) that can be either protein-coding or non-coding. The primary transcript …
H2AFY2	-1391	chr10:71810725-71811205	480	26	1	3.9327	2.9663	8.0014	chr10	71812356	71872040	+	NM_018649	core histone macro-H2A.2	NP_061119	55506
FAM24B-CUZD1	-1856	chr10:124640773-124641253	480	26	1	3.9327	2.9663	8.0014	chr10	124639157	124591670	-	NR_037915			100533195	This locus represents naturally occurring read-through transcription between the neighboring FAM24B (family with sequence similarity 24, member B) and CUZD1 (CUB and zona pellucida-like domains 1) genes on chromosome 10. The read-transcript is a candidate for nonsense-mediated mRNA decay, and is thus unlikely to produce a protein product. [provided by RefSeq, Feb 2011].
FAM24B	-1856	chr10:124640773-124641253	480	26	1	3.9327	2.9663	8.0014	chr10	124639157	124608609	-	NM_152644	hypothetical protein LOC196792 precursor	NP_689857	196792
CRYBB2	1367	chr22:25616738-25617218	480	26	1	3.9327	2.9663	8.0014	chr22	25615611	25627836	+	NM_000496	beta-crystallin B2	NP_000487	1415	Crystallins are separated into two classes: taxon-specific, or enzyme, and ubiquitous. The latter class constitutes the major proteins of vertebrate eye lens and maintains the transparency and refractive index of the lens. Since lens central fiber cells lose their nuclei during development, these crystallins are made and then retained throughout life, making them extremely stable proteins. Mammal…
EDEM3	1147	chr1:184722654-184723134	480	39	2	3.9171	3.5435	10.8575	chr1	184724041	184659624	-	NM_025191	ER degradation-enhancing alpha-mannosidase-like 3 precursor	NP_079467	80267	Quality control in the endoplasmic reticulum (ER) ensures that only properly folded proteins are retained in the cell through recognition and degradation of misfolded or unassembled proteins. EDEM3 belongs to a group of proteins that accelerate degradation of misfolded glycoproteins in the ER (Hirao et al., 2006 [PubMed 16431915]).[supplied by OMIM, Mar 2008].
LOC390940	1906	chr19:44086330-44086872	542	64	4	3.8835	4.2637	16.9294	chr19	44084695	44086256	+	NM_001193622	hypothetical protein LOC390940 isoform 2	NP_001180551	390940
SNORD115-16	310	chr15:25444664-25445144	480	38	2	3.8804	3.5252	10.5755	chr15	25444594	25444676	+	NR_003308			100033454
PSTPIP1	524	chr15:77287748-77288228	480	38	2	3.8804	3.5252	10.5755	chr15	77287464	77329671	+	NM_003978	proline-serine-threonine phosphatase-interacting protein 1	NP_003969	9051	The protein encoded by this gene binds to the cytoplasmic tail of CD2, an effector of T cell activation and adhesion, negatively affecting CD2-triggered T cell activation. The encoded protein appears to be a scaffold protein and a regulator of the actin cytoskeleton. It has also been shown to bind ABL1, PTPN18, WAS, CD2AP, and PTPN12. Mutations in this gene are a cause of PAPA syndrome. [provided…
ZNF702P	292	chr19:53496252-53496732	480	25	1	3.878	2.939	7.4278	chr19	53496784	53471503	-	NR_003578			79986
KRTAP19-1	-1027	chr21:31853423-31853903	480	25	1	3.878	2.939	7.4278	chr21	31852636	31852363	-	NM_181607	keratin-associated protein 19-1	NP_853638	337882
FSHB	525	chr11:30252847-30253327	480	25	1	3.878	2.939	7.4278	chr11	30252562	30256824	+	NM_001018080	follitropin subunit beta precursor	NP_001018090	2488	The pituitary glycoprotein hormone family includes follicle-stimulating hormone, luteinizing hormone, chorionic gonadotropin, and thyroid-stimulating hormone. All of these glycoproteins consist of an identical alpha subunit and a hormone-specific beta subunit. This gene encodes the beta subunit of follicle-stimulating hormone. In conjunction with luteinizing hormone, follicle-stimulating hormone …
TTC25	-1965	chr17:40084682-40085162	480	37	2	3.8428	3.5064	10.294	chr17	40086887	40117668	+	NM_031421	tetratricopeptide repeat protein 25	NP_113609	83538
PPM1K	-1950	chr4:89207598-89208078	480	24	1	3.8212	2.9106	7.1418	chr4	89205888	89181531	-	NM_152542	protein phosphatase 1K, mitochondrial	NP_689755	152926
OR4P4	-1870	chr11:55403723-55404203	480	24	1	3.8212	2.9106	7.1418	chr11	55405833	55406772	+	NM_001004124	olfactory receptor 4P4	NP_001004124	81300	Olfactory receptors interact with odorant molecules in the nose, to initiate a neuronal response that triggers the perception of a smell. The olfactory receptor proteins are members of a large family of G-protein-coupled receptors (GPCR) arising from single coding-exon genes. Olfactory receptors share a 7-transmembrane domain structure with many neurotransmitter and hormone receptors and are resp…
NPY1R	23	chr4:164253684-164254164	480	24	1	3.8212	2.9106	7.1418	chr4	164253947	164245116	-	NM_000909	neuropeptide Y receptor type 1	NP_000900	4886	Neuropeptide Y (NPY; MIM 162640) is one of the most abundant neuropeptides in the mammalian nervous system and exhibits a diverse range of important physiologic activities, including effects on psychomotor activity, food intake, regulation of central endocrine secretion, and potent vasoactive effects on the cardiovascular system. Two major subtypes of NPY (Y1 and Y2) have been defined by pharmaco…
IGSF1	181	chrX:130422614-130423094	480	24	1	3.8212	2.9106	7.1418	chrX	130423035	130418139	-	NM_001170963	immunoglobulin superfamily member 1 isoform 2	NP_001164434	3547	This gene encodes a member of the immunoglobulin-like domain-containing superfamily. Proteins in this superfamily contain varying numbers of immunoglobulin-like domains and are thought to participate in the regulation of interactions between cells. Multiple transcript variants encoding different isoforms have been found for this gene.[provided by RefSeq, Jan 2010].
RNF6	-604	chr13:26796872-26797352	480	36	2	3.8042	3.487	10.013	chr13	26796508	26786904	-	NM_005977	E3 ubiquitin-protein ligase RNF6	NP_005968	6049	The protein encoded by this gene contains a RING-H2 finger motif. Deletions and mutations in this gene were detected in esophageal squamous cell carcinoma (ESCC), suggesting that this protein may be a potential tumor suppressor. Studies of the mouse counterpart suggested a role of this protein in the transcription regulation that controls germinal differentiation. Multiple alternatively spliced t…
RARB	1326	chr3:25470919-25471399	480	36	2	3.8042	3.487	10.013	chr3	25469833	25639422	+	NM_000965	retinoic acid receptor beta isoform 1	NP_000956	5915	This gene encodes retinoic acid receptor beta, a member of the thyroid-steroid hormone receptor superfamily of nuclear transcriptional regulators. This receptor localizes to the cytoplasm and to subnuclear compartments. It binds retinoic acid, the biologically active form of vitamin A which mediates cellular signalling in embryonic morphogenesis, cell growth and differentiation. It is thought tha…
GHR	-1235	chr5:42546669-42547149	480	36	2	3.8042	3.487	10.013	chr5	42548144	42721980	+	NM_001242402	growth hormone receptor isoform 1 precursor	NP_001229331	2690	This gene encodes a member of the type I cytokine receptor family, which is a transmembrane receptor for growth hormone. Binding of growth hormone to the receptor leads to receptor dimerization and the activation of an intra- and intercellular signal transduction pathway leading to growth. Mutations in this gene have been associated with Laron syndrome, also known as the growth hormone insensitiv…
PTBP2	-1919	chr1:97184979-97185532	553	97	7	3.8002	4.9001	24.287	chr1	97187174	97280605	+	NM_021190	polypyrimidine tract-binding protein 2	NP_067013	58155	The protein encoded by this gene binds to the intronic cluster of RNA regulatory elements, downstream control sequence (DCS). It is implicated in controlling the assembly of other splicing-regulatory proteins. This protein is very similar to the polypyrimidine tract binding protein but it is expressed primarily in the brain. [provided by RefSeq, Jul 2008]. Publication Note: This RefSeq record inc…
ZNF791	1642	chr19:12723133-12723613	480	48	3	3.796	3.898	12.9114	chr19	12721731	12740676	+	NM_153358	zinc finger protein 791	NP_699189	163049
IFNA21	1500	chr9:21164919-21165399	480	48	3	3.796	3.898	12.9114	chr9	21166659	21165635	-	NM_002175	interferon alpha-21 precursor	NP_002166	3452	This gene is a member of the alpha interferon gene cluster on the short arm of chromosome 9. Interferons are cytokines produced in response to viral infection that mediate the immune response and interfere with viral replication. The encoded protein is a type I interferon and may play a specific role in the antiviral response to rubella virus. [provided by RefSeq, Sep 2011]. Sequence Note: This R…
LOC100500773	143	chr8:96960193-96960673	480	47	3	3.7662	3.8831	12.3555	chr8	96960576	96959212	-	NR_036611			100500773
USP33	-1518	chr1:78226815-78227295	480	35	2	3.7645	3.4672	9.7324	chr1	78225537	78177337	-	NM_201626	ubiquitin carboxyl-terminal hydrolase 33 isoform 3	NP_963920	23032
NRBP1	1575	chr2:27652807-27653287	480	35	2	3.7645	3.4672	9.7324	chr2	27651472	27665124	+	NM_013392	nuclear receptor-binding protein	NP_037524	29959
MTR	-425	chr1:236957915-236958395	480	35	2	3.7645	3.4672	9.7324	chr1	236958580	237067281	+	NM_000254	methionine synthase	NP_000245	4548	MTR encodes the enzyme 5-methyltetrahydrofolate-homocysteine methyltransferase. This enzyme, also known as cobalamin-dependent methionine synthase, catalyzes the final step in methionine biosynthesis. Mutations in MTR have been identified as the underlying cause of methylcobalamin deficiency complementation group G. [provided by RefSeq, Jul 2008]. Sequence Note: This RefSeq record was created fro…
LOC100506733	1802	chr10:50331445-50331925	480	35	2	3.7645	3.4672	9.7324	chr10	50329883	50359592	+	NR_038973			100506733
LINC00114	1053	chr21:40139605-40140085	480	35	2	3.7645	3.4672	9.7324	chr21	40140898	40110948	-	NR_027066			400866
SPINK4	-602	chr9:33239353-33239833	480	23	1	3.7621	2.881	6.8563	chr9	33240195	33248565	+	NM_014471	serine protease inhibitor Kazal-type 4 precursor	NP_055286	27290
RNF13	1750	chr3:149531984-149532464	480	23	1	3.7621	2.881	6.8563	chr3	149530474	149679925	+	NM_183381	E3 ubiquitin-protein ligase RNF13	NP_899237	11342	The protein encoded by this gene contains a RING zinc finger, a motif known to be involved in protein-protein interactions. The specific function of this gene has not yet been determined. Alternatively spliced transcript variants that encode the same protein have been reported. A pseudogene, which is also located on chromosome 3, has been defined for this gene. [provided by RefSeq, Jul 2008].
OR52N4	-631	chr11:5775051-5775531	480	23	1	3.7621	2.881	6.8563	chr11	5775922	5776959	+	NM_001005175	olfactory receptor 52N4	NP_001005175	390072	Olfactory receptors interact with odorant molecules in the nose, to initiate a neuronal response that triggers the perception of a smell. The olfactory receptor proteins are members of a large family of G-protein-coupled receptors (GPCR) arising from single coding-exon genes. Olfactory receptors share a 7-transmembrane domain structure with many neurotransmitter and hormone receptors and are resp…
ITGA1	680	chr5:52084575-52085055	480	23	1	3.7621	2.881	6.8563	chr5	52084135	52249485	+	NM_181501	integrin alpha-1 precursor	NP_852478	3672	This gene encodes the alpha 1 subunit of integrin receptors. This protein heterodimerizes with the beta 1 subunit to form a cell-surface receptor for collagen and laminin. The heterodimeric receptor is involved in cell-cell adhesion and may play a role in inflammation and fibrosis. The alpha 1 subunit contains an inserted (I) von Willebrand factor type I domain which is thought to be involved in …
GMPR2	684	chr14:24702546-24703026	480	23	1	3.7621	2.881	6.8563	chr14	24702102	24708447	+	NM_001002002	GMP reductase 2 isoform 2	NP_001002002	51292
ANKRD37	402	chr4:186318001-186318481	480	23	1	3.7621	2.881	6.8563	chr4	186317839	186321390	+	NM_181726	ankyrin repeat domain-containing protein 37	NP_859077	353322
LYPD5	1455	chr19:44323113-44323593	480	34	2	3.7237	3.4468	9.4523	chr19	44324808	44300078	-	NM_182573	ly6/PLAUR domain-containing protein 5 isoform B	NP_872379	284348
LOC400927	1531	chr22:38793160-38793640	480	34	2	3.7237	3.4468	9.4523	chr22	38794931	38740669	-	NR_002821			400927
LOC100505676	1456	chr8:67339516-67339996	480	34	2	3.7237	3.4468	9.4523	chr8	67341212	67331821	-	NR_040434			100505676
WDR49	1972	chr3:167369077-167369557	480	22	1	3.7004	2.8502	6.5713	chr3	167371289	167196472	-	NM_178824	WD repeat-containing protein 49	NP_849146	151790
GRIA1	-520	chr5:152869323-152869803	480	22	1	3.7004	2.8502	6.5713	chr5	152870083	153193429	+	NM_001114183	glutamate receptor 1 isoform 2 precursor	NP_001107655	2890	Glutamate receptors are the predominant excitatory neurotransmitter receptors in the mammalian brain and are activated in a variety of normal neurophysiologic processes. These receptors are heteromeric protein complexes with multiple subunits, each possessing transmembrane regions, and all arranged to form a ligand-gated ion channel. The classification of glutamate receptors is based on their act…
FTHL17	1363	chrX:31088567-31089047	480	22	1	3.7004	2.8502	6.5713	chrX	31090170	31089357	-	NM_031894	ferritin heavy polypeptide-like 17	NP_114100	53940	This gene is orthologous to a mouse gene that encodes a ferritin heavy polypeptide-like protein and shows testis-specific expression. [provided by RefSeq, Oct 2009].
CD244	-1379	chr1:160833831-160834311	480	22	1	3.7004	2.8502	6.5713	chr1	160832692	160799949	-	NM_001166664	natural killer cell receptor 2B4 isoform 3 precursor	NP_001160136	51744	This gene encodes a cell surface receptor expressed on natural killer (NK) cells (and some T cells) that mediate non-major histocompatibility complex (MHC) restricted killing. The interaction between NK-cell and target cells via this receptor is thought to modulate NK-cell cytolytic activity. Alternatively spliced transcript variants encoding different isoforms have been found for this gene.[prov…
TMIGD1	-722	chr17:28661547-28662027	480	33	2	3.6817	3.4258	8.8937	chr17	28661065	28643365	-	NM_206832	transmembrane and immunoglobulin	NP_996663	388364
SNORD56B	-239	chr14:71864574-71865054	480	33	2	3.6817	3.4258	8.8937	chr14	71865053	71865124	+	NR_001276			319139
SLAIN1	1358	chr13:78316412-78316892	480	33	2	3.6817	3.4258	8.8937	chr13	78315294	78338377	+	NM_001242871	SLAIN motif-containing protein 1 isoform E	NP_001229800	122060
RFWD2	-1425	chr1:176177555-176178035	480	33	2	3.6817	3.4258	8.8937	chr1	176176370	175913966	-	NM_001001740	E3 ubiquitin-protein ligase RFWD2 isoform d24	NP_001001740	64326
MRPL18	813	chr6:160212064-160212544	480	33	2	3.6817	3.4258	8.8937	chr6	160211491	160219461	+	NM_014161	39S ribosomal protein L18, mitochondrial precursor	NP_054880	29074	Mammalian mitochondrial ribosomal proteins are encoded by nuclear genes and help in protein synthesis within the mitochondrion. Mitochondrial ribosomes (mitoribosomes) consist of a small 28S subunit and a large 39S subunit. They have an estimated 75% protein to rRNA composition compared to prokaryotic ribosomes, where this ratio is reversed. Another difference between mammalian mitoribosomes and …
BANK1	-1953	chr4:102709570-102710050	480	33	2	3.6817	3.4258	8.8937	chr4	102711763	102995969	+	NM_001127507	B-cell scaffold protein with ankyrin repeats isoform 3	NP_001120979	55024	The protein encoded by this gene is a B-cell-specific scaffold protein that functions in B-cell receptor-induced calcium mobilization from intracellular stores. This protein can also promote Lyn-mediated tyrosine phosphorylation of inositol 1,4,5-trisphosphate receptors. Polymorphisms in this gene are associated with susceptibility to systemic lupus erythematosus. Alternative splicing results in …
RDX	1106	chr11:110166091-110166571	480	43	3	3.6401	3.8201	11.2489	chr11	110167437	110100165	-	NM_002906	radixin	NP_002897	5962	Radixin is a cytoskeletal protein that may be important in linking actin to the plasma membrane. It is highly similar in sequence to both ezrin and moesin. The radixin gene has been localized by fluorescence in situ hybridization to 11q23. A truncated version representing a pseudogene (RDXP2) was assigned to Xp21.3. Another pseudogene that seemed to lack introns (RDXP1) was mapped to 11p by South…
ZFP106	536	chr15:42748954-42749434	480	32	2	3.6384	3.4042	8.6152	chr15	42749730	42705020	-	NM_022473	zinc finger protein 106 homolog	NP_071918	64397
WDR27	428	chr6:170101491-170101971	480	32	2	3.6384	3.4042	8.6152	chr6	170102159	169857302	-	NM_182552	WD repeat-containing protein 27 isoform 1	NP_872358	253769
WDFY1	1190	chr2:224808622-224809102	480	32	2	3.6384	3.4042	8.6152	chr2	224810052	224740064	-	NM_020830	WD repeat and FYVE domain-containing protein 1	NP_065881	57590	The FYVE domain mediates the recruitment of proteins involved in membrane trafficking and cell signaling to phosphatidylinositol 3-phosphate (PtdIns(3)P)-containing membranes. This gene encodes a protein which contains a single FYVE domain and multiple WD40 repeats. This protein is localized to endosomes. [provided by RefSeq, Jul 2008].
LINC00161	1010	chr21:29912409-29912889	480	32	2	3.6384	3.4042	8.6152	chr21	29911639	29912677	+	NR_026553			118421
SPZ1	-1616	chr5:79613933-79614413	480	21	1	3.636	2.818	6.287	chr5	79615789	79617660	+	NM_032567	spermatogenic leucine zipper protein 1	NP_115956	84654
SKA1	-711	chr18:47900440-47900920	480	21	1	3.636	2.818	6.287	chr18	47901391	47920538	+	NM_145060	spindle and kinetochore-associated protein 1	NP_659497	220134
PRPF4	1030	chr9:116038703-116039183	480	21	1	3.636	2.818	6.287	chr9	116037913	116055185	+	NM_004697	U4/U6 small nuclear ribonucleoprotein Prp4 isoform 1	NP_004688	9128	The protein encoded by this gene is part of a heteromeric complex that binds U4, U5, and U6 small nuclear RNAs and is involved in pre-mRNA splicing. The encoded protein also is a mitotic checkpoint protein and a regulator of chemoresistance in human ovarian cancer. Two transcript variants encoding different isoforms have been found for this gene. [provided by RefSeq, Oct 2011].
DNAJB1	-369	chr19:14629330-14629810	480	21	1	3.636	2.818	6.287	chr19	14629201	14625581	-	NM_006145	dnaJ homolog subfamily B member 1	NP_006136	3337
C6	-556	chr5:41261856-41262336	480	21	1	3.636	2.818	6.287	chr5	41261540	41142335	-	NM_001115131	complement component C6 precursor	NP_001108603	729	C6 is a component of complement cascade. It is part of the membrane attack complex which can insert into the cell membrane and cause cell to lyse. People with C6 deficiency are prone to bacterial infection. Two transcript variants encoding the same protein have been found for this gene. [provided by RefSeq, Jul 2008].
RBM8A	535	chr1:145507851-145508331	480	53	4	3.6149	4.1294	13.342	chr1	145507556	145513535	+	NM_005105	RNA-binding protein 8A	NP_005096	9939	This gene encodes a protein with a conserved RNA-binding motif. The protein is found predominantly in the nucleus, although it is also present in the cytoplasm. It is preferentially associated with mRNAs produced by splicing, including both nuclear mRNAs and newly exported cytoplasmic mRNAs. It is thought that the protein remains associated with spliced mRNAs as a tag to indicate where introns ha…
CCR8	-1154	chr3:39369802-39370282	480	42	3	3.6068	3.8034	10.9734	chr3	39371196	39375171	+	NM_005201	C-C chemokine receptor type 8	NP_005192	1237	This gene encodes a member of the beta chemokine receptor family, which is predicted to be a seven transmembrane protein similar to G protein-coupled receptors. Chemokines and their receptors are important for the migration of various cell types into the inflammatory sites. This receptor protein preferentially expresses in the thymus. I-309, thymus activation-regulated cytokine (TARC) and macroph…
RG9MTD3	-1233	chr9:37752328-37752808	480	31	2	3.5938	3.3819	8.3373	chr9	37753801	37778969	+	NM_144964	RNA (guanine-9-)-methyltransferase domain-containing protein 3	NP_659401	158234
OR2L13	1140	chr1:248101392-248101872	480	31	2	3.5938	3.3819	8.3373	chr1	248100492	248264224	+	NM_175911	olfactory receptor 2L13	NP_787107	284521	Olfactory receptors interact with odorant molecules in the nose, to initiate a neuronal response that triggers the perception of a smell. The olfactory receptor proteins are members of a large family of G-protein-coupled receptors (GPCR) arising from single coding-exon genes. Olfactory receptors share a 7-transmembrane domain structure with many neurotransmitter and hormone receptors and are resp…
PCNAP1	-642	chr4:100083206-100083686	480	20	1	3.5686	2.7843	6.0033	chr4	100082804	100081750	-	NR_028270			359806
LPL	-301	chr8:19796040-19796520	480	20	1	3.5686	2.7843	6.0033	chr8	19796581	19824770	+	NM_000237	lipoprotein lipase precursor	NP_000228	4023	LPL encodes lipoprotein lipase, which is expressed in heart, muscle, and adipose tissue. LPL functions as a homodimer, and has the dual functions of triglyceride hydrolase and ligand/bridging factor for receptor-mediated lipoprotein uptake. Severe mutations that cause LPL deficiency result in type I hyperlipoproteinemia, while less extreme mutations in LPL are linked to many disorders of lipoprot…
E2F3	854	chr6:20402750-20403230	480	20	1	3.5686	2.7843	6.0033	chr6	20402136	20493945	+	NM_001949	transcription factor E2F3 isoform 1	NP_001940	1871	The protein encoded by this gene is a member of the E2F family of transcription factors. The E2F family plays a crucial role in the control of cell cycle and action of tumor suppressor proteins and is also a target of the transforming proteins of small DNA tumor viruses. The E2F proteins contain several evolutionally conserved domains found in most members of the family. These domains include a D…
C7orf36	1607	chr7:39607369-39607849	480	20	1	3.5686	2.7843	6.0033	chr7	39606002	39612480	+	NM_020192	hypothetical protein LOC57002	NP_064577	57002
C1orf114	-214	chr1:169396644-169397124	480	20	1	3.5686	2.7843	6.0033	chr1	169396670	169364113	-	NM_021179	uncharacterized protein C1orf114	NP_067002	57821
GPR88	-855	chr1:101002597-101003148	551	51	4	3.5602	4.102	12.796	chr1	101003727	101007583	+	NM_022049	probable G-protein coupled receptor 88	NP_071332	54112
ZNF619	232	chr3:40518624-40519104	480	30	2	3.5478	3.3589	8.0601	chr3	40518632	40530069	+	NM_001145083	zinc finger protein 619 isoform 5	NP_001138555	285267
TPM1	-989	chr15:63333608-63334088	480	30	2	3.5478	3.3589	8.0601	chr15	63334837	63358292	+	NM_000366	tropomyosin alpha-1 chain isoform 5	NP_000357	7168	This gene is a member of the tropomyosin family of highly conserved, widely distributed actin-binding proteins involved in the contractile system of striated and smooth muscles and the cytoskeleton of non-muscle cells. Tropomyosin is composed of two alpha-helical chains arranged as a coiled-coil. It is polymerized end to end along the two grooves of actin filaments and provides stability to the f…
SULF1	-19	chr8:70404768-70405248	480	30	2	3.5478	3.3589	8.0601	chr8	70405027	70573147	+	NM_001128206	extracellular sulfatase Sulf-1 precursor	NP_001121678	23213	Heparan sulfate proteoglycans (HSPGs) act as coreceptors for numerous heparin-binding growth factors and cytokines and are involved in cell signaling. Heparan sulfate 6-O-endosulfatases, such as SULF1, selectively remove 6-O-sulfate groups from heparan sulfate. This activity modulates the effects of heparan sulfate by altering binding sites for signaling molecules (Dai et al., 2005 [PubMed 161922…
GPR112	1703	chrX:135384584-135385064	480	30	2	3.5478	3.3589	8.0601	chrX	135383121	135499047	+	NM_153834	probable G-protein coupled receptor 112	NP_722576	139378	This gene encodes a G-protein coupled receptor belonging to a large family of diverse integral membrane proteins that participate in various physiological functions. Members of this superfamily are characterized by a signature 7-transmembrane domain motif. The ligand for this family member is unknown, and it is therefore an orphan receptor. This receptor is known to be expressed in normal enteroc…
CCBL1	1979	chr9:131642135-131642615	480	30	2	3.5478	3.3589	8.0601	chr9	131644354	131595391	-	NM_001122672	kynurenine--oxoglutarate transaminase 1 isoform b	NP_001116144	883	This gene encodes a cytosolic enzyme that is responsible for the metabolism of cysteine conjugates of certain halogenated alkenes and alkanes. This metabolism can form reactive metabolites leading to nephrotoxicity and neurotoxicity. Increased levels of this enzyme have been linked to schizophrenia. Multiple transcript variants that encode different isoforms have been identified for this gene. [p…
RSBN1L	-609	chr7:77324893-77325373	480	40	3	3.5378	3.7689	10.1501	chr7	77325742	77409120	+	NM_198467	round spermatid basic protein 1-like protein	NP_940869	222194
MEIS3	-1899	chr19:47924444-47924924	480	40	3	3.5378	3.7689	10.1501	chr19	47922785	47906382	-	NM_020160	homeobox protein Meis3 isoform 1	NP_064545	56917
IFIT3	1536	chr10:91093534-91094014	480	40	3	3.5378	3.7689	10.1501	chr10	91092238	91100725	+	NM_001031683	interferon-induced protein with tetratricopeptide repeats 3	NP_001026853	3437
NLK	33	chr17:26369346-26370094	748	80	7	3.5242	4.7621	19.1193	chr17	26369687	26523404	+	NM_016231	serine/threonine-protein kinase NLK	NP_057315	51701
PRDM1	1389	chr6:106535178-106535988	810	59	5	3.5045	4.3372	14.3591	chr6	106534194	106557814	+	NM_001198	PR domain zinc finger protein 1 isoform 1	NP_001189	639	This gene encodes a protein that acts as a repressor of beta-interferon gene expression. The protein binds specifically to the PRDI (positive regulatory domain I element) of the beta-IFN gene promoter. Transcription of this gene increases upon virus induction. Two alternatively spliced transcript variants that encode different isoforms have been reported. [provided by RefSeq, Jul 2008].
VWA5B2	1344	chr3:183949420-183949900	480	49	4	3.5034	4.0736	12.2518	chr3	183948316	183960117	+	NM_138345	von Willebrand factor A domain-containing	NP_612354	90113
CDK14	1957	chr7:90340428-90340908	480	49	4	3.5034	4.0736	12.2518	chr7	90338711	90839904	+	NM_012395	cyclin-dependent kinase 14	NP_036527	5218	PFTK1 is a member of the CDC2 (MIM 116940)-related protein kinase family (Yang and Chen, 2001 [PubMed 11313143]).[supplied by OMIM, Mar 2008]. Publication Note: This RefSeq record includes a subset of the publications that are available for this gene. Please see the Gene record to access additional publications.
WDR72	1648	chr15:54049971-54050451	480	39	3	3.5021	3.751	9.8768	chr15	54051859	53805937	-	NM_182758	WD repeat-containing protein 72	NP_877435	256764	This gene encodes a protein with seven WD40 domains. Mutations in this gene have been associated with autosomal recessive hypomaturation amelogenesis imperfect type IIA3. [provided by RefSeq, Aug 2011].
MIER2	-1770	chr19:346321-346801	480	39	3	3.5021	3.751	9.8768	chr19	344791	305574	-	NM_017550	mesoderm induction early response protein 2	NP_060020	54531
HKR1	-1216	chr19:37824123-37824603	480	39	3	3.5021	3.751	9.8768	chr19	37825579	37855357	+	NM_181786	Krueppel-related zinc finger protein 1	NP_861451	284459
GSPT1	1769	chr16:12007816-12008296	480	39	3	3.5021	3.751	9.8768	chr16	12009825	11961984	-	NM_002094	eukaryotic peptide chain release factor GTP-binding subunit ERF3A isoform 1	NP_002085	2935
ANKRD28	-1330	chr3:15799148-15799628	480	39	3	3.5021	3.751	9.8768	chr3	15798058	15708743	-	NM_001195099	serine/threonine-protein phosphatase 6 regulatory ankyrin repeat subunit A isoform b	NP_001182028	23243
ZNRF2P1	-1708	chr7:32765613-32766093	480	29	2	3.5003	3.3351	7.7836	chr7	32767561	32769595	+	NR_003502			441208
DDX17	143	chr22:38901962-38902442	480	29	2	3.5003	3.3351	7.7836	chr22	38902345	38879442	-	NM_006386	probable ATP-dependent RNA helicase DDX17 isoform 1	NP_006377	10521	DEAD box proteins, characterized by the conserved motif Asp-Glu-Ala-Asp (DEAD), are putative RNA helicases. They are implicated in a number of cellular processes involving alteration of RNA secondary structure, such as translation initiation, nuclear and mitochondrial splicing, and ribosome and splicesosome assembly. Based on their distribution patterns, some members of this family are believed t…
C7orf25	-1864	chr7:42953313-42953793	480	29	2	3.5003	3.3351	7.7836	chr7	42951689	42948871	-	NM_024054	hypothetical protein LOC79020 isoform b	NP_076959	79020
WARS	-256	chr14:100841943-100842423	480	19	1	3.4979	2.749	5.7204	chr14	100841927	100800124	-	NM_213646	tryptophanyl-tRNA synthetase, cytoplasmic isoform b	NP_998811	7453	Aminoacyl-tRNA synthetases catalyze the aminoacylation of tRNA by their cognate amino acid. Because of their central role in linking amino acids with nucleotide triplets contained in tRNAs, aminoacyl-tRNA synthetases are thought to be among the first proteins that appeared in evolution. Two forms of tryptophanyl-tRNA synthetase exist, a cytoplasmic form, named WARS, and a mitochondrial form, name…
IL16	950	chr15:81518349-81518829	480	19	1	3.4979	2.749	5.7204	chr15	81517639	81605104	+	NM_172217	pro-interleukin-16 isoform 2	NP_757366	3603	The protein encoded by this gene is a pleiotropic cytokine that functions as a chemoattractant, a modulator of T cell activation, and an inhibitor of HIV replication. The signaling process of this cytokine is mediated by CD4. The product of this gene undergoes proteolytic processing, which is found to yield two functional proteins. The cytokine function is exclusively attributed to the secreted C…
ANXA2P3	-1223	chr10:66583821-66584301	480	19	1	3.4979	2.749	5.7204	chr10	66585284	66586634	+	NR_001446			305
IKBKB	1441	chr8:42129892-42130628	736	48	4	3.4741	4.059	11.9805	chr8	42128819	42190171	+	NM_001242778	inhibitor of nuclear factor kappa-B kinase subunit beta isoform 5	NP_001229707	3551	The protein encoded by this gene phosphorylates the inhibitor in the inhibitor/NF-kappa-B complex, causing dissociation of the inhibitor and activation of NF-kappa-B. The encoded protein itself is found in a complex of proteins. Several transcript variants, some protein-coding and some not, have been found for this gene. [provided by RefSeq, Sep 2011].
GDPD4	1279	chr11:76996944-76997424	480	38	3	3.4654	3.7327	9.6041	chr11	76998463	76927602	-	NM_182833	glycerophosphodiester phosphodiesterase	NP_878253	220032
CLCN5	1307	chrX:49833281-49833761	480	38	3	3.4654	3.7327	9.6041	chrX	49832214	49863892	+	NM_000084	H(+)/Cl(-) exchange transporter 5 isoform b	NP_000075	1184	This gene encodes a member of the ClC family of chloride ion channels and ion transporters. Mutations in this gene have been found in Dent disease and renal tubular disorders complicated by nephrolithiasis. Alternatively spliced transcript variants encoding different isoforms have been found for this gene. [provided by RefSeq, Jul 2008].
SORT1	-728	chr1:109936467-109936947	480	28	2	3.4512	3.3106	7.5077	chr1	109935979	109852187	-	NM_001205228	sortilin isoform 2	NP_001192157	6272	This gene encodes a protein that is a multi-ligand type-1 receptor with similarity to the yeast carboxypeptidase Y sorting receptor Vps10 protein. The encoded protein, a trans-Golgi network (TGN) transmembrane protein, binds a number of unrelated ligands that participate in a wide range of cellular processes; however, it lacks the typical features of a signalling receptor. In the TGN, furin media…
SMARCC1	-1045	chr3:47824210-47824690	480	28	2	3.4512	3.3106	7.5077	chr3	47823405	47627377	-	NM_003074	SWI/SNF complex subunit SMARCC1	NP_003065	6599	The protein encoded by this gene is a member of the SWI/SNF family of proteins, whose members display helicase and ATPase activities and which are thought to regulate transcription of certain genes by altering the chromatin structure around those genes. The encoded protein is part of the large ATP-dependent chromatin remodeling complex SNF/SWI and contains a predicted leucine zipper motif typical…
YIPF2	1545	chr19:11037572-11038052	480	47	4	3.4443	4.0441	11.4394	chr19	11039357	11033443	-	NM_024029	protein YIPF2	NP_076934	78992
COX7B2	-1588	chr4:46912593-46913087	494	66	6	3.4419	4.5283	15.6635	chr4	46911252	46736846	-	NM_130902	cytochrome c oxidase subunit 7B2, mitochondrial precursor	NP_570972	170712
REG1B	-790	chr2:79315700-79316180	480	37	3	3.4278	3.7139	9.3321	chr2	79315150	79312148	-	NM_006507	lithostathine-1-beta precursor	NP_006498	5968	This gene is a type I subclass member of the Reg gene family. The Reg gene family is a multigene family grouped into four subclasses, types I, II, III and IV based on the primary structures of the encoded proteins. This gene encodes a protein secreted by the exocrine pancreas that is highly similar to the REG1A protein. The related REG1A protein is associated with islet cell regeneration and diab…
LOC100188947	-1300	chr10:93372277-93372757	480	37	3	3.4278	3.7139	9.3321	chr10	93371217	93066718	-	NR_024467			100188947
GRM4	-1198	chr6:34102401-34102881	480	37	3	3.4278	3.7139	9.3321	chr6	34101443	33989627	-	NM_000841	metabotropic glutamate receptor 4 precursor	NP_000832	2914	L-glutamate is the major excitatory neurotransmitter in the central nervous system and activates both ionotropic and metabotropic glutamate receptors. Glutamatergic neurotransmission is involved in most aspects of normal brain function and can be perturbed in many neuropathologic conditions. The metabotropic glutamate receptors are a family of G protein-coupled receptors, that have been divided i…
ANKRD5	-1564	chr20:10013892-10014372	480	37	3	3.4278	3.7139	9.3321	chr20	10015696	10037407	+	NM_198798	ankyrin repeat domain-containing protein 5	NP_942093	63926
TNFSF18	659	chr1:173019204-173019684	480	18	1	3.4236	2.7118	5.157	chr1	173020103	173010359	-	NM_005092	tumor necrosis factor ligand superfamily member 18	NP_005083	8995	The protein encoded by this gene is a cytokine that belongs to the tumor necrosis factor (TNF) ligand family. This cytokine is a ligand for receptor TNFRSF18/AITR/GITR. It has been shown to modulate T lymphocyte survival in peripheral tissues. This cytokine is also found to be expressed in endothelial cells, and is thought to be important for interaction between T lymphocytes and endothelial cell…
STXBP4	146	chr17:53046031-53046511	480	18	1	3.4236	2.7118	5.157	chr17	53046125	53241449	+	NM_178509	syntaxin-binding protein 4	NP_848604	252983
TAF7	979	chr5:140699132-140699612	480	46	4	3.4138	4.0288	11.1697	chr5	140700351	140698056	-	NM_005642	transcription initiation factor TFIID subunit 7	NP_005633	6879	The intronless gene for this transcription coactivator is located between the protocadherin beta and gamma gene clusters on chromosome 5. The protein encoded by this gene is a component of the TFIID protein complex, a complex which binds to the TATA box in class II promoters and recruits RNA polymerase II and other factors. This particular subunit interacts with the largest TFIID subunit, as well…
MIR658	-642	chr22:38240731-38241309	578	74	7	3.4127	4.7063	17.2436	chr22	38240378	38240278	-	NR_030395			724028	microRNAs (miRNAs) are short (20-24 nt) non-coding RNAs that are involved in post-transcriptional regulation of gene expression in multicellular organisms by affecting both the stability and translation of mRNAs. miRNAs are transcribed by RNA polymerase II as part of capped and polyadenylated primary transcripts (pri-miRNAs) that can be either protein-coding or non-coding. The primary transcript …
PCM1	-1523	chr8:17778602-17779082	480	27	2	3.4004	3.2852	7.2326	chr8	17780365	17887457	+	NM_006197	pericentriolar material 1 protein	NP_006188	5108	The protein encoded by this gene is a component of centriolar satellites, which are electron dense granules scattered around centrosomes. Inhibition studies show that this protein is essential for the correct localization of several centrosomal proteins, and for anchoring microtubules to the centrosome. Chromosomal aberrations involving this gene are associated with papillary thyroid carcinomas a…
BAG6	-1450	chr6:31621687-31622167	480	27	2	3.4004	3.2852	7.2326	chr6	31620477	31606804	-	NM_001199697	large proline-rich protein BAG6 isoform c	NP_001186626	7917	This gene was first characterized as part of a cluster of genes located within the human major histocompatibility complex class III region. This gene encodes a nuclear protein that is cleaved by caspase 3 and is implicated in the control of apoptosis. In addition, the protein forms a complex with E1A binding protein p300 and is required for the acetylation of p53 in response to DNA damage. Multip…
IQCF3	1860	chr3:51862518-51862998	480	64	6	3.398	4.5064	15.1283	chr3	51860898	51864874	+	NM_001207023	IQ domain-containing protein F3	NP_001193952	401067
ZNF561	231	chr19:9731313-9732057	744	36	3	3.3891	3.6946	9.0607	chr19	9731916	9718001	-	NM_152289	zinc finger protein 561	NP_689502	93134
APH1A	-351	chr1:150241720-150242200	480	36	3	3.3891	3.6946	9.0607	chr1	150241609	150237798	-	NM_001243771	gamma-secretase subunit APH-1A isoform 3	NP_001230700	51107	This gene encodes a component of the gamma secretase complex that cleaves integral membrane proteins such as Notch receptors and beta-amyloid precursor protein. The gamma secretase complex contains this gene product, or the paralogous anterior pharynx defective 1 homolog B (APH1B), along with the presenilin, nicastrin, and presenilin enhancer-2 proteins. The precise function of this seven-transme…
ABHD13	970	chr13:108871492-108871972	480	36	3	3.3891	3.6946	9.0607	chr13	108870762	108886603	+	NM_032859	abhydrolase domain-containing protein 13	NP_116248	84945
ST3GAL5	338	chr2:86094215-86094695	480	45	4	3.3826	4.0132	10.9006	chr2	86094793	86066271	-	NM_001042437	lactosylceramide alpha-2,3-sialyltransferase isoform 2	NP_001035902	8869	Ganglioside GM3 is known to participate in the induction of cell differentiation, modulation of cell proliferation, maintenance of fibroblast morphology, signal transduction, and integrin-mediated cell adhesion. The protein encoded by this gene is a type II membrane protein which catalyzes the formation of GM3 using lactosylceramide as the substrate. The encoded protein is a member of glycosyltra…
SYS1-DBNDD2	426	chr20:43991994-43992474	480	53	5	3.3518	4.2609	12.4791	chr20	43991808	44039250	+	NR_003189			767557	This locus represents naturally occurring read-through transcription from the neighboring SYS1 Golgi-localized integral membrane protein homolog and dysbindin domain containing 2 (DBNDD2) genes. The read-through transcript includes the majority of exons from each individual gene, but it would be subject to nonsense-mediated mRNA decay (NMD) and is therefore predicted to be non-coding. [provided b…
VCX3B	-457	chrX:8432173-8432653	480	44	4	3.3508	3.9973	10.6321	chrX	8432870	8434551	+	NM_001001888	variable charge X-linked protein 3B	NP_001001888	425054	This gene belongs to the VCX/Y gene family, which has multiple members on both X and Y chromosomes, and all are expressed exclusively in male germ cells. The X-linked members are clustered on chromosome Xp22, and the Y-linked members are two identical copies of the gene within a palindromic region on chromosome Yq11. The family members share a high degree of sequence identity, with the exception …
LOC285629	-1826	chr5:160367164-160367754	590	44	4	3.3508	3.9973	10.6321	chr5	160365633	160358785	-	NR_027111			285629
LINC00242	321	chr6:170198360-170198840	480	44	4	3.3508	3.9973	10.6321	chr6	170198921	170188885	-	NR_026781			401288
LSM3	488	chr3:14220475-14220955	480	35	3	3.3494	3.6747	8.7899	chr3	14220227	14239869	+	NM_014463	U6 snRNA-associated Sm-like protein LSm3	NP_055278	27258	Sm-like proteins were identified in a variety of organisms based on sequence homology with the Sm protein family (see SNRPD2; MIM 601061). Sm-like proteins contain the Sm sequence motif, which consists of 2 regions separated by a linker of variable length that folds as a loop. The Sm-like proteins are thought to form a stable heteromer present in tri-snRNP particles, which are important for pre-m…
LOC728640	-1218	chr10:60473316-60473796	480	35	3	3.3494	3.6747	8.7899	chr10	60474774	60477293	+	NR_027508			728640
GRB10	485	chr7:50772273-50772753	480	35	3	3.3494	3.6747	8.7899	chr7	50772998	50657759	-	NM_001001550	growth factor receptor-bound protein 10 isoform c	NP_001001550	2887	The product of this gene belongs to a small family of adapter proteins that are known to interact with a number of receptor tyrosine kinases and signaling molecules. This gene encodes a growth factor receptor-binding protein that interacts with insulin receptors and insulin-like growth-factor receptors. Overexpression of some isoforms of the encoded protein inhibits tyrosine kinase activity and r…
WDR61	1923	chr15:78589777-78590257	480	26	2	3.3477	3.2588	6.9583	chr15	78591940	78575577	-	NM_025234	WD repeat-containing protein 61	NP_079510	80349	WDR61 is a subunit of the human PAF and SKI complexes, which function in transcriptional regulation and are involved in events downstream of RNA synthesis, such as RNA surveillance (Zhu et al., 2005 [PubMed 16024656]).[supplied by OMIM, Mar 2008].
RACGAP1P	-1767	chr12:45460721-45461201	480	26	2	3.3477	3.2588	6.9583	chr12	45459194	45456400	-	NR_026583			83956
NEDD1	-1543	chr12:97299217-97299697	480	26	2	3.3477	3.2588	6.9583	chr12	97301000	97347469	+	NM_001135177	protein NEDD1 isoform c	NP_001128649	121441
MIR2355	533	chr2:207974024-207974504	480	26	2	3.3477	3.2588	6.9583	chr2	207974797	207974710	-	NR_036227			100423036	microRNAs (miRNAs) are short (20-24 nt) non-coding RNAs that are involved in post-transcriptional regulation of gene expression in multicellular organisms by affecting both the stability and translation of mRNAs. miRNAs are transcribed by RNA polymerase II as part of capped and polyadenylated primary transcripts (pri-miRNAs) that can be either protein-coding or non-coding. The primary transcript …
MCOLN2	1324	chr1:85461232-85461712	480	26	2	3.3477	3.2588	6.9583	chr1	85462796	85391265	-	NM_153259	mucolipin-2	NP_694991	255231	Mucolipins constitute a family of cation channel proteins with homology to the transient receptor potential superfamily. In mammals, the mucolipin family includes 3 members, MCOLN1 (MIM 605248), MCOLN2, and MCOLN3 (MIM 607400), that exhibit a common 6-membrane-spanning topology. Homologs of mammalian mucolipins exist in Drosophila and C. elegans. Mutations in the human MCOLN1 gene cause mucolipod…
ADK	1643	chr10:75937649-75938129	480	26	2	3.3477	3.2588	6.9583	chr10	75936246	76469061	+	NM_001202449	adenosine kinase isoform c	NP_001189378	132	This gene an enzyme which catalyzes the transfer of the gamma-phosphate from ATP to adenosine, thereby serving as a regulator of concentrations of both extracellular adenosine and intracellular adenine nucleotides. Adenosine has widespread effects on the cardiovascular, nervous, respiratory, and immune systems and inhibitors of the enzyme could play an important pharmacological role in increasing…
KDELR1	182	chr19:48894388-48894868	480	17	1	3.3453	2.6727	4.8767	chr19	48894810	48885826	-	NM_006801	ER lumen protein retaining receptor 1	NP_006792	10945	Retention of resident soluble proteins in the lumen of the endoplasmic reticulum (ER) is achieved in both yeast and animal cells by their continual retrieval from the cis-Golgi, or a pre-Golgi compartment. Sorting of these proteins is dependent on a C-terminal tetrapeptide signal, usually lys-asp-glu-leu (KDEL) in animal cells, and his-asp-glu-leu (HDEL) in S. cerevisiae. This process is mediated…
IL36G	317	chr2:113735682-113736162	480	17	1	3.3453	2.6727	4.8767	chr2	113735605	113743227	+	NM_019618	interleukin-36 gamma	NP_062564	56300	The protein encoded by this gene is a member of the interleukin 1 cytokine family. The activity of this cytokine is mediated by interleukin 1 receptor-like 2 (IL1RL2/IL1R-rp2), and is specifically inhibited by interleukin 1 family, member 5 (IL1F5/IL-1 delta). Interferon-gamma, tumor necrosis factor-alpha and interleukin 1, beta (IL1B) are reported to stimulate the expression of this cytokine in …
TCAM1P	964	chr17:61935099-61935579	480	43	4	3.3182	3.981	10.3641	chr17	61934375	61941739	+	NR_002947			146771	Members of the immunoglobulin superfamily are found in hundreds of proteins of different functions. Immunoglobulin-like domains may be involved in protein-protein and protein-ligand interactions. This superfamily member is the human ortholog of a testis-specific cell adhesion molecule previously characterized in mouse and rat. The putative membrane protein contains immunoglobulin domains and may …
SNORD53	-79	chr2:29149613-29150093	480	43	4	3.3182	3.981	10.3641	chr2	29149932	29150008	+	NR_002741			26796
MIR4715	1945	chr15:26091787-26092267	480	43	4	3.3182	3.981	10.3641	chr15	26093972	26093893	-	NR_039865			100616474	microRNAs (miRNAs) are short (20-24 nt) non-coding RNAs that are involved in post-transcriptional regulation of gene expression in multicellular organisms by affecting both the stability and translation of mRNAs. miRNAs are transcribed by RNA polymerase II as part of capped and polyadenylated primary transcripts (pri-miRNAs) that can be either protein-coding or non-coding. The primary transcript …
EPHA7	-1956	chr6:94131016-94131496	480	43	4	3.3182	3.981	10.3641	chr6	94129300	93949739	-	NM_004440	ephrin type-A receptor 7 precursor	NP_004431	2045	This gene belongs to the ephrin receptor subfamily of the protein-tyrosine kinase family. EPH and EPH-related receptors have been implicated in mediating developmental events, particularly in the nervous system. Receptors in the EPH subfamily typically have a single kinase domain and an extracellular region containing a Cys-rich domain and 2 fibronectin type III repeats. The ephrin receptors are …
SNORD114-13	-320	chr14:101435655-101436135	480	34	3	3.3086	3.6543	8.5199	chr14	101436215	101436288	+	NR_003206			767591
RHBDD2	557	chr7:75508633-75509113	480	34	3	3.3086	3.6543	8.5199	chr7	75508316	75518244	+	NM_001040457	rhomboid domain-containing protein 2 isoform b	NP_001035547	57414
HOXA7	-1241	chr7:27197297-27197777	480	34	3	3.3086	3.6543	8.5199	chr7	27196296	27193337	-	NM_006896	homeobox protein Hox-A7	NP_008827	3204	In vertebrates, the genes encoding the class of transcription factors called homeobox genes are found in clusters named A, B, C, and D on four separate chromosomes. Expression of these proteins is spatially and temporally regulated during embryonic development. This gene is part of the A cluster on chromosome 7 and encodes a DNA-binding transcription factor which may regulate gene expression, mor…
GPR107	-1914	chr9:132813830-132814310	480	34	3	3.3086	3.6543	8.5199	chr9	132815984	132902448	+	NM_020960	protein GPR107 isoform 3	NP_066011	57720
CHCHD8	1804	chr11:73585846-73586326	480	34	3	3.3086	3.6543	8.5199	chr11	73587890	73583712	-	NM_016565	coiled-coil-helix-coiled-coil-helix domain-containing protein 8	NP_057649	51287
RCAN1	-1297	chr21:35900255-35900862	607	86	9	3.3058	4.9748	19.3586	chr21	35899261	35888783	-	NM_203418	calcipressin-1 isoform c	NP_981963	1827	The protein encoded by this gene interacts with calcineurin A and inhibits calcineurin-dependent signaling pathways, possibly affecting central nervous system development. This gene is located in the minimal candidate region for the Down syndrome phenotype, and is overexpressed in the brain of Down syndrome fetuses. Chronic overexpression of this gene may lead to neurofibrillary tangles such as t…
EDNRB	736	chr13:78491990-78492470	480	51	5	3.2972	4.2335	11.9466	chr13	78492966	78469615	-	NM_001122659	endothelin B receptor isoform 1 precursor	NP_001116131	1910	The protein encoded by this gene is a G protein-coupled receptor which activates a phosphatidylinositol-calcium second messenger system. Its ligand, endothelin, consists of a family of three potent vasoactive peptides: ET1, ET2, and ET3. Studies suggest that the multigenic disorder, Hirschsprung disease type 2, is due to mutations in the endothelin receptor type B gene. Alternatively spliced tran…
CCP110	1824	chr16:19536762-19537242	480	51	5	3.2972	4.2335	11.9466	chr16	19535178	19564728	+	NM_001199022	centriolar coiled-coil protein of 110 kDa isoform 1	NP_001185951	9738
SLC44A1	-1660	chr9:108005028-108005508	480	25	2	3.293	3.2315	6.4123	chr9	108006928	108153682	+	NM_080546	choline transporter-like protein 1	NP_536856	23446
OLIG3	-320	chr6:137815611-137816091	480	25	2	3.293	3.2315	6.4123	chr6	137815531	137813335	-	NM_175747	oligodendrocyte transcription factor 3	NP_786923	167826
OLFM1	-900	chr9:137965948-137966428	480	25	2	3.293	3.2315	6.4123	chr9	137967088	138013030	+	NM_014279	noelin isoform 1	NP_055094	10439	This gene product shares extensive sequence similarity with the rat neuronal olfactomedin-related ER localized protein. While the exact function of the encoded protein is not known, its abundant expression in brain suggests that it may have an essential role in nerve tissue. Several alternatively spliced transcripts encoding different isoforms have been found for this gene. [provided by RefSeq, J…
MIR4451	-549	chr4:86642831-86643311	480	25	2	3.293	3.2315	6.4123	chr4	86643620	86643686	+	NR_039656			100616349	microRNAs (miRNAs) are short (20-24 nt) non-coding RNAs that are involved in post-transcriptional regulation of gene expression in multicellular organisms by affecting both the stability and translation of mRNAs. miRNAs are transcribed by RNA polymerase II as part of capped and polyadenylated primary transcripts (pri-miRNAs) that can be either protein-coding or non-coding. The primary transcript …
KLHL32	459	chr6:97372714-97373194	480	25	2	3.293	3.2315	6.4123	chr6	97372495	97588630	+	NM_052904	kelch-like protein 32	NP_443136	114792
ISX	791	chr22:35462680-35463160	480	25	2	3.293	3.2315	6.4123	chr22	35462129	35483380	+	NM_001008494	intestine-specific homeobox	NP_001008494	91464	Homeobox genes encode DNA-binding proteins, many of which are thought to be involved in early embryonic development. Homeobox genes encode a DNA-binding domain of 60 to 63 amino acids referred to as the homeodomain. This gene is a member of the RAXLX homeobox gene family. [provided by RefSeq, Jul 2008].
DAAM2	-1181	chr6:39758737-39759217	480	25	2	3.293	3.2315	6.4123	chr6	39760158	39872653	+	NM_001201427	disheveled-associated activator of morphogenesis 2 isoform 1	NP_001188356	23500
ANGPT1	974	chr8:108509040-108509520	480	25	2	3.293	3.2315	6.4123	chr8	108510254	108261709	-	NM_001199859	angiopoietin-1 isoform 2 precursor	NP_001186788	284	Angiopoietins are proteins with important roles in vascular development and angiogenesis. All angiopoietins bind with similar affinity to an endothelial cell-specific tyrosine-protein kinase receptor. The protein encoded by this gene is a secreted glycoprotein that activates the receptor by inducing its tyrosine phosphorylation. It plays a critical role in mediating reciprocal interactions betwee…
ADAM23	1627	chr2:207309754-207310234	480	25	2	3.293	3.2315	6.4123	chr2	207308367	207482679	+	NM_003812	disintegrin and metalloproteinase domain-containing protein 23 preproprotein	NP_003803	8745	This gene encodes a member of the ADAM (a disintegrin and metalloprotease domain) family. Members of this family are membrane-anchored proteins structurally related to snake venom disintegrins, and have been implicated in a variety of biological processes involving cell-cell and cell-matrix interactions, including fertilization, muscle development, and neurogenesis. This gene is highly expressed …
TXLNG	1185	chrX:16805499-16805979	480	42	4	3.2849	3.9644	10.0968	chrX	16804554	16862642	+	NM_001168683	gamma-taxilin isoform 2	NP_001162154	55787	This gene encodes a member of the taxilin family. The encoded protein binds to the C-terminal coiled-coil region of syntaxin family members 1A, 3A and 4A, and may play a role in intracellular vesicle trafficking. This gene is up-regulated by lipopolysaccharide and the gene product may be involved in cell cycle regulation. The related mouse protein was also shown to inhibit activating transcriptio…
POU6F1	-1590	chr12:51612827-51613307	480	42	4	3.2849	3.9644	10.0968	chr12	51611477	51580718	-	NR_026893			5463
KRTAP6-3	1746	chr21:31966264-31966744	480	42	4	3.2849	3.9644	10.0968	chr21	31964758	31965374	+	NM_181605	keratin-associated protein 6-3	NP_853636	337968
TPTE2P6	1462	chr13:25155567-25156047	480	59	6	3.2821	4.4484	13.5336	chr13	25154345	25171812	+	NR_002815			374491
ZNF17	-1662	chr19:57920626-57921106	480	50	5	3.269	4.2195	11.6811	chr19	57922528	57933307	+	NM_006959	zinc finger protein 17	NP_008890	7565
AHSP	1016	chr16:31539974-31540462	488	50	5	3.269	4.2195	11.6811	chr16	31539202	31540124	+	NM_016633	alpha-hemoglobin-stabilizing protein	NP_057717	51327
TAF10	-713	chr11:6633948-6634428	480	33	3	3.2666	3.6333	7.9823	chr11	6633475	6632047	-	NM_006284	transcription initiation factor TFIID subunit 10	NP_006275	6881	Initiation of transcription by RNA polymerase II requires the activities of more than 70 polypeptides. The protein that coordinates these activities is transcription factor IID (TFIID), which binds to the core promoter to position the polymerase properly, serves as the scaffold for assembly of the remainder of the transcription complex, and acts as a channel for regulatory signals. TFIID is compo…
MYOC	1584	chr1:171619949-171620429	480	33	3	3.2666	3.6333	7.9823	chr1	171621773	171604556	-	NM_000261	myocilin precursor	NP_000252	4653	MYOC encodes the protein myocilin, which is believed to have a role in cytoskeletal function. MYOC is expressed in many occular tissues, including the trabecular meshwork, and was revealed to be the trabecular meshwork glucocorticoid-inducible response protein (TIGR). The trabecular meshwork is a specialized eye tissue essential in regulating intraocular pressure, and mutations in MYOC have been …
DCN	-1477	chr12:91578043-91578523	480	33	3	3.2666	3.6333	7.9823	chr12	91576806	91539034	-	NM_001920	decorin isoform a preproprotein	NP_001911	1634	The protein encoded by this gene is a small cellular or pericellular matrix proteoglycan that is closely related in structure to biglycan protein. The encoded protein and biglycan are thought to be the result of a gene duplication. This protein is a component of connective tissue, binds to type I collagen fibrils, and plays a role in matrix assembly. It contains one attached glycosaminoglycan cha…
CHRNB3	769	chr8:42553090-42553570	480	33	3	3.2666	3.6333	7.9823	chr8	42552561	42592209	+	NM_000749	neuronal acetylcholine receptor subunit beta-3 precursor	NP_000740	1142	The nicotinic acetylcholine receptors (nAChRs) are members of a superfamily of ligand-gated ion channels that mediate fast signal transmission at synapses. The nAChRs are (hetero)pentamers composed of homologous subunits. The subunits that make up the muscle and neuronal forms of nAChRs are encoded by separate genes and have different primary structure. There are several subtypes of neuronal nACh…
OR2K2	-1012	chr9:114091202-114092249	1047	75	8	3.262	4.8009	16.7154	chr9	114090713	114089762	-	NM_205859	olfactory receptor 2K2	NP_995581	26248	Olfactory receptors interact with odorant molecules in the nose, to initiate a neuronal response that triggers the perception of a smell. The olfactory receptor proteins are members of a large family of G-protein-coupled receptors (GPCR) arising from single coding-exon genes. Olfactory receptors share a 7-transmembrane domain structure with many neurotransmitter and hormone receptors and are resp…
LINC00158	1444	chr21:26802315-26802823	508	41	4	3.2508	3.9473	9.8302	chr21	26804013	26758132	-	NR_024027			54072
CA13	-1291	chr8:86156184-86156664	480	41	4	3.2508	3.9473	9.8302	chr8	86157715	86196302	+	NM_198584	carbonic anhydrase 13	NP_940986	377677	Carbonic anhydrases (CAs) are a family of zinc metalloenzymes. For background information on the CA family, see MIM 114800.[supplied by OMIM, Mar 2008].
CACYBP	-1449	chr1:174966576-174967666	1090	116	13	3.2495	5.4321	25.2094	chr1	174968570	174981163	+	NM_001007214	calcyclin-binding protein isoform 2	NP_001007215	27101	The protein encoded by this gene is a calcyclin binding protein. It may be involved in calcium-dependent ubiquitination and subsequent proteosomal degradation of target proteins. It probably serves as a molecular bridge in ubiquitin E3 complexes and participates in the ubiquitin-mediated degradation of beta-catenin. Two alternatively spliced transcript variants encoding different isoforms have be…
WFDC9	-1408	chr20:44261075-44261555	480	24	2	3.2362	3.2031	6.1408	chr20	44259907	44236577	-	NM_147198	protein WFDC9 precursor	NP_671731	259240	The WAP-type four-disulfide core (WFDC) domain, or WAP signature motif, contains eight cysteines forming four disulfide bonds at the core of the protein, and functions as a protease inhibitor in many members of the WFDC domain family. This gene encodes a protein which contains a WFDC domain, and is thus a member of the WFDC domain family. This gene and several other gene family members are cluste…
RCN2	-1097	chr15:77222624-77223104	480	24	2	3.2362	3.2031	6.1408	chr15	77223961	77242601	+	NM_002902	reticulocalbin-2 precursor	NP_002893	5955	The protein encoded by this gene is a calcium-binding protein located in the lumen of the ER. The protein contains six conserved regions with similarity to a high affinity Ca(+2)-binding motif, the EF-hand. This gene maps to the same region as type 4 Bardet-Biedl syndrome, suggesting a possible causative role for this gene in the disorder. [provided by RefSeq, Feb 2009]. Sequence Note: This RefSe…
LOC100507053	1430	chr4:100011197-100011677	480	24	2	3.2362	3.2031	6.1408	chr4	100010007	100222513	+	NR_037884			100507053
GLUD2	1554	chrX:120182775-120183255	480	24	2	3.2362	3.2031	6.1408	chrX	120181461	120183796	+	NM_012084	glutamate dehydrogenase 2, mitochondrial precursor	NP_036216	2747	The protein encoded by this gene is localized to the mitochondrion and acts as a homohexamer to recycle glutamate during neurotransmission. The encoded enzyme catalyzes the reversible oxidative deamination of glutamate to alpha-ketoglutarate. This gene is intronless.[provided by RefSeq, Jan 2010]. Publication Note: This RefSeq record includes a subset of the publications that are available for th…
CLDN11	1886	chr3:170140673-170141153	480	24	2	3.2362	3.2031	6.1408	chr3	170139027	170152479	+	NM_001185056	claudin-11 isoform 2	NP_001171985	5010	This gene encodes a member of the claudin family. Claudins are integral membrane proteins and components of tight junction strands. Tight junction strands serve as a physical barrier to prevent solutes and water from passing freely through the paracellular space between epithelial or endothelial cell sheets, and also play critical roles in maintaining cell polarity and signal transductions. The p…
APC	-1374	chr5:112041587-112042067	480	24	2	3.2362	3.2031	6.1408	chr5	112043201	112181936	+	NM_001127511	adenomatous polyposis coli protein isoform a	NP_001120983	324	This gene encodes a tumor suppressor protein that acts as an antagonist of the Wnt signaling pathway. It is also involved in other processes including cell migration and adhesion, transcriptional activation, and apoptosis. Defects in this gene cause familial adenomatous polyposis (FAP), an autosomal dominant pre-malignant disease that usually progresses to malignancy. Disease-associated mutations…
SAMM50	-1583	chr22:44349437-44349917	480	32	3	3.2234	3.6117	7.7147	chr22	44351260	44392412	+	NM_015380	sorting and assembly machinery component 50 homolog	NP_056195	25813	This gene encodes a component of the Sorting and Assembly Machinery (SAM) of the mitochondrial outer membrane. The Sam complex functions in the assembly of beta-barrel proteins into the outer mitochondrial membrane.[provided by RefSeq, Jun 2011].
MIR4716	1695	chr15:49459415-49459895	480	32	3	3.2234	3.6117	7.7147	chr15	49461350	49461266	-	NR_039866			100616332	microRNAs (miRNAs) are short (20-24 nt) non-coding RNAs that are involved in post-transcriptional regulation of gene expression in multicellular organisms by affecting both the stability and translation of mRNAs. miRNAs are transcribed by RNA polymerase II as part of capped and polyadenylated primary transcripts (pri-miRNAs) that can be either protein-coding or non-coding. The primary transcript …
HMGN2P46	1290	chr15:45804383-45804863	480	32	3	3.2234	3.6117	7.7147	chr15	45803333	45848928	+	NR_022014			283651
HDHD2	1502	chr18:44675129-44675609	480	32	3	3.2234	3.6117	7.7147	chr18	44676871	44633780	-	NM_032124	haloacid dehalogenase-like hydrolase domain-containing protein 2	NP_115500	84064
CELF6	1773	chr15:72610274-72610754	480	32	3	3.2234	3.6117	7.7147	chr15	72612287	72577067	-	NM_001172684	CUGBP Elav-like family member 6 isoform 2	NP_001166155	60677	Members of the CELF/BRUNOL protein family contain two N-terminal RNA recognition motif (RRM) domains, one C-terminal RRM domain, and a divergent segment of 160-230 aa between the second and third RRM domains. Members of this protein family regulate pre-mRNA alternative splicing and may also be involved in mRNA editing, and translation. Multiple alternatively spliced transcript variants encoding d…
ARHGEF7	1725	chr13:111769108-111769588	480	32	3	3.2234	3.6117	7.7147	chr13	111767623	111947542	+	NM_001113512	rho guanine nucleotide exchange factor 7 isoform d	NP_001106984	8874	Rho GTPases play a fundamental role in numerous cellular processes triggered by extracellular stimuli that work through G protein coupled receptors. The encoded protein belongs to a family of cytoplasmic proteins that activate the Ras-like family of Rho proteins by exchanging bound GDP for GTP. It forms a complex with the small GTP binding protein Rac1 and recruits Rac1 to membrane ruffles and to…
ARHGEF37	-1052	chr5:148959842-148960322	480	32	3	3.2234	3.6117	7.7147	chr5	148961134	149014527	+	NM_001001669	rho guanine nucleotide exchange factor 37	NP_001001669	389337
OR4K2	-1584	chr14:20342376-20343308	932	73	8	3.2233	4.7816	16.1915	chr14	20344426	20345371	+	NM_001005501	olfactory receptor 4K2	NP_001005501	390431	Olfactory receptors interact with odorant molecules in the nose, to initiate a neuronal response that triggers the perception of a smell. The olfactory receptor proteins are members of a large family of G-protein-coupled receptors (GPCR) arising from single coding-exon genes. Olfactory receptors share a 7-transmembrane domain structure with many neurotransmitter and hormone receptors and are resp…
RESP18	63	chr2:220197596-220198076	480	40	4	3.2159	3.9299	9.2991	chr2	220197899	220192130	-	NM_001007089	regulated endocrine-specific protein 18	NP_001007090	389075
L1CAM	-1370	chrX:153142480-153143059	579	48	5	3.2111	4.1905	11.1521	chrX	153141399	153126970	-	NM_001143963	neural cell adhesion molecule L1 isoform 3 precursor	NP_001137435	3897	The protein encoded by this gene is an axonal glycoprotein belonging to the immunoglobulin supergene family. The ectodomain, consisting of several immunoglobulin-like domains and fibronectin-like repeats (type III), is linked via a single transmembrane sequence to a conserved cytoplasmic domain. This cell adhesion molecule plays an important role in nervous system development, including neuronal …
FANCC	1666	chr9:98077630-98078110	480	48	5	3.2111	4.1905	11.1521	chr9	98079536	97861335	-	NM_001243743	Fanconi anemia group C protein isoform a	NP_001230672	2176	The Fanconi anemia complementation group (FANC) currently includes FANCA, FANCB, FANCC, FANCD1 (also called BRCA2), FANCD2, FANCE, FANCF, FANCG, FANCI, FANCJ (also called BRIP1), FANCL, FANCM and FANCN (also called PALB2). The previously defined group FANCH is the same as FANCA. Fanconi anemia is a genetically heterogeneous recessive disorder characterized by cytogenetic instability, hypersensiti…
NAT1	-1602	chr8:18065667-18066364	697	56	6	3.2078	4.4112	12.7431	chr8	18067617	18081198	+	NM_000662	arylamine N-acetyltransferase 1 isoform a	NP_000653	9	This gene is one of two arylamine N-acetyltransferase (NAT) genes in the human genome, and is orthologous to the mouse and rat Nat2 genes. The enzyme encoded by this gene catalyzes the transfer of an acetyl group from acetyl-CoA to various arylamine and hydrazine substrates. This enzyme helps metabolize drugs and other xenobiotics, and functions in folate catabolism. Multiple transcript variants …
SLC9A6	-724	chrX:135066618-135067098	480	63	7	3.1829	4.5915	14.0745	chrX	135067582	135129428	+	NM_001177651	sodium/hydrogen exchanger 6 isoform c	NP_001171122	10479	This gene encodes a sodium-hydrogen exchanger that is amember of the solute carrier family 9. The encoded protein localizes to early and recycling endosomes and may be involved in regulating endosomal pH and volume. Defects in this gene are associated with X-linked syndromic mental retardation, Christianson type. Alternate splicing results in multiple transcript variants.[provided by RefSeq, Apr …
SCN3A	40	chr2:166060297-166060777	480	47	5	3.1812	4.1756	10.6256	chr2	166060577	165944029	-	NM_006922	sodium channel protein type 3 subunit alpha isoform 1	NP_008853	6328	Voltage-gated sodium channels are transmembrane glycoprotein complexes composed of a large alpha subunit with 24 transmembrane domains and one or more regulatory beta subunits. They are responsible for the generation and propagation of action potentials in neurons and muscle. This gene encodes one member of the sodium channel alpha subunit gene family, and is found in a cluster of five alpha subu…
GALNT9	348	chr12:132905317-132905797	480	47	5	3.1812	4.1756	10.6256	chr12	132905905	132680916	-	NM_001122636	polypeptide N-acetylgalactosaminyltransferase 9 isoform A	NP_001116108	50614	This gene encodes a member of the UDP-N-acetyl-alpha-D-galactosamine:polypeptide N-acetylgalactosaminyltransferase (GalNAc-T) family of enzymes. GalNAc-Ts initiate mucin-type O-linked glycosylation in the Golgi apparatus by catalyzing the transfer of GalNAc to serine and threonine residues on target proteins. They are characterized by an N-terminal transmembrane domain, a stem region, a lumenal c…
FKBP9L	-1139	chr7:55758024-55758561	537	47	5	3.1812	4.1756	10.6256	chr7	55757153	55748766	-	NR_027339			360132
ALDH1A1	1180	chr9:75566668-75567439	771	47	5	3.1812	4.1756	10.6256	chr9	75568233	75515577	-	NM_000689	retinal dehydrogenase 1	NP_000680	216	The protein encoded by this gene belongs to the aldehyde dehydrogenase family. Aldehyde dehydrogenase is the next enzyme after alcohol dehydrogenase in the major pathway of alcohol metabolism. There are two major aldehyde dehydrogenase isozymes in the liver, cytosolic and mitochondrial, which are encoded by distinct genes, and can be distinguished by their electrophoretic mobility, kinetic proper…
MIR548T	1341	chr7:147627785-147628265	480	39	4	3.1801	3.912	9.0347	chr7	147626684	148043927	+	NR_036093			100422849	microRNAs (miRNAs) are short (20-24 nt) non-coding RNAs that are involved in post-transcriptional regulation of gene expression in multicellular organisms by affecting both the stability and translation of mRNAs. miRNAs are transcribed by RNA polymerase II as part of capped and polyadenylated primary transcripts (pri-miRNAs) that can be either protein-coding or non-coding. The primary transcript …
GORAB	-1834	chr1:170499188-170499668	480	39	4	3.1801	3.912	9.0347	chr1	170501262	170514929	+	NM_001146039	RAB6-interacting golgin isoform b	NP_001139511	92344	This gene encodes a member of the golgin family, a group of coiled-coil proteins localized to the Golgi. The encoded protein may function in the secretory pathway. The encoded protein, which also localizes to the cytoplasm, was identified by interactions with the N-terminal kinase-like protein, and thus it may function in mitosis. Mutations in this gene have been associated with geroderma osteody…
DTNA	1017	chr18:32290972-32291452	480	39	4	3.1801	3.912	9.0347	chr18	32290195	32448776	+	NM_001198941	dystrobrevin alpha isoform 13	NP_001185870	1837	The protein encoded by this gene belongs to the dystrobrevin subfamily of the dystrophin family. This protein is a component of the dystrophin-associated protein complex (DPC), which consists of dystrophin and several integral and peripheral membrane proteins, including dystroglycans, sarcoglycans, syntrophins and alpha- and beta-dystrobrevin. The DPC localizes to the sarcolemma and its disruptio…
ZNF441	1324	chr19:11878898-11879378	480	31	3	3.1788	3.5894	7.4479	chr19	11877814	11894893	+	NM_152355	zinc finger protein 441	NP_689568	126068
TMEM70	1813	chr8:74889949-74890429	480	31	3	3.1788	3.5894	7.4479	chr8	74888376	74895018	+	NM_001040613	transmembrane protein 70, mitochondrial isoform b	NP_001035703	54968	This gene likely encodes a mitochondrial membrane protein. The encoded protein may play a role in biogenesis of mitochondrial ATP synthase. Mutations in this gene have been associated with neonatal mitochondrial encephalocardiomyopathy due to ATP synthase deficiency. Alternatively spliced transcript variants have been described. [provided by RefSeq, Feb 2010].
TANK	1316	chr2:161994541-161995021	480	31	3	3.1788	3.5894	7.4479	chr2	161993465	162061490	+	NM_133484	TRAF family member-associated NF-kappa-B activator isoform b	NP_597841	10010	The TRAF (tumor necrosis factor receptor-associated factor) family of proteins associate with and transduce signals from members of the tumor necrosis factor receptor superfamily. The protein encoded by this gene is found in the cytoplasm and can bind to TRAF1, TRAF2, or TRAF3, thereby inhibiting TRAF function by sequestering the TRAFs in a latent state in the cytoplasm. For example, the protein …
NDP	-1606	chrX:43834287-43834767	480	31	3	3.1788	3.5894	7.4479	chrX	43832921	43808023	-	NM_000266	norrin precursor	NP_000257	4693	This gene encodes a secreted protein with a cystein-knot motif that activates the Wnt/beta-catenin pathway. The protein forms disulfide-linked oligomers in the extracellular matrix. Mutations in this gene result in Norrie disease and X-linked exudative vitreoretinopathy. [provided by RefSeq, Feb 2009]. Publication Note: This RefSeq record includes a subset of the publications that are available f…
HCRTR2	-1229	chr6:55037601-55038081	480	31	3	3.1788	3.5894	7.4479	chr6	55039070	55147418	+	NM_001526	orexin receptor type 2	NP_001517	3062	The protein encoded by this gene is a G-protein coupled receptor involved in the regulation of feeding behavior. The encoded protein binds the hypothalamic neuropeptides orexin A and orexin B. A related gene (HCRTR1) encodes a G-protein coupled receptor that selectively binds orexin A. [provided by RefSeq, Jan 2009]. Publication Note: This RefSeq record includes a subset of the publications that …
GPR174	1744	chrX:78427972-78428452	480	31	3	3.1788	3.5894	7.4479	chrX	78426468	78427726	+	NM_032553	probable G-protein coupled receptor 174	NP_115942	84636	This gene encodes a protein belonging to the G protein-coupled receptor superfamily. These proteins are characterized by the presence of seven alpha-helical transmembrane domains, and they activate or interact with various endogenous or exogenous ligands, including neurotransmitters, hormones, and odorant and taste substances. This family member is classified as an orphan receptor because the cog…
AP1G2	-133	chr14:24037172-24037652	480	31	3	3.1788	3.5894	7.4479	chr14	24037279	24028776	-	NM_003917	AP-1 complex subunit gamma-like 2	NP_003908	8906	Adaptins are important components of clathrin-coated vesicles transporting ligand-receptor complexes from the plasma membrane or from the trans-Golgi network to lysosomes. The adaptin family of proteins is compsed of four classes of molecules named alpha, beta-, beta prime- and gamma- adaptins. Adaptins, together with medium and small subunits, form a heterotetrameric complex called an adaptor, w…
NPNT	1469	chr4:106817825-106818305	480	23	2	3.1771	3.1735	5.8702	chr4	106816596	106892828	+	NM_001184692	nephronectin isoform D precursor	NP_001171621	255743
GMNN	27	chr6:24774950-24775430	480	23	2	3.1771	3.1735	5.8702	chr6	24775163	24786278	+	NM_015895	geminin	NP_056979	51053
FLJ42969	-834	chr8:102063207-102063687	480	23	2	3.1771	3.1735	5.8702	chr8	102064281	102088479	+	NR_033962			441374
CKAP2	-1039	chr13:53028215-53028695	480	23	2	3.1771	3.1735	5.8702	chr13	53029494	53050763	+	NM_018204	cytoskeleton-associated protein 2 isoform 1	NP_060674	26586	CKAP2 is a cytoskeleton-associated protein involved in mitotic progression (Seki and Fang, 2007 [PubMed 17376772]).[supplied by OMIM, Mar 2008].
STARD9	-1733	chr15:42865824-42866422	598	78	9	3.166	4.9049	17.0051	chr15	42867856	43013196	+	NM_020759	stAR-related lipid transfer protein 9	NP_065810	57519
PCDHB3	-221	chr5:140479686-140480338	652	62	7	3.1601	4.5801	13.8135	chr5	140480233	140483406	+	NM_018937	protocadherin beta-3 precursor	NP_061760	56132	This gene is a member of the protocadherin beta gene cluster, one of three related gene clusters tandemly linked on chromosome five. The gene clusters demonstrate an unusual genomic organization similar to that of B-cell and T-cell receptor gene clusters. The beta cluster contains 16 genes and 3 pseudogenes, each encoding 6 extracellular cadherin domains and a cytoplasmic tail that deviates from …
ERCC3	1441	chr2:128050034-128050588	554	54	6	3.156	4.3854	11.9577	chr2	128051752	128014865	-	NM_000122	TFIIH basal transcription factor complex helicase XPB subunit	NP_000113	2071	ERCC3 is an ATP-dependent DNA helicase that functions in nucleotide excision repair and complements xeroderma pigmentosum group B mutations. It also is the 89 kDa subunit of basal transcription factor 2 (TFIIH) and thus functions in class II transcription. [provided by RefSeq, Jul 2008]. Publication Note: This RefSeq record includes a subset of the publications that are available for this gene. P…
KLHL13	-589	chrX:117251642-117252142	500	46	5	3.1507	4.1603	10.3634	chrX	117251303	117031775	-	NM_001168301	kelch-like protein 13 isoform d	NP_001161773	90293	This gene encodes a BTB and kelch domain containing protein and belongs to the kelch repeat domain containing superfamily of proteins. The encoded protein functions as an adaptor protein that complexes with Cullin 3 and other proteins to form the Cullin 3-based E3 ubiquitin-protein ligase complex. This complex is necessary for proper chromosome segregation and completion of cytokinesis. Alternate…
BRD4	-1820	chr19:15392831-15393334	503	46	5	3.1507	4.1603	10.3634	chr19	15391262	15357846	-	NM_014299	bromodomain-containing protein 4 isoform short	NP_055114	23476	The protein encoded by this gene is homologous to the murine protein MCAP, which associates with chromosomes during mitosis, and to the human RING3 protein, a serine/threonine kinase. Each of these proteins contains two bromodomains, a conserved sequence motif which may be involved in chromatin targeting. This gene has been implicated as the chromosome 19 target of translocation t(15;19)(q13;p13.…
ARF4	1171	chr3:57581804-57582284	480	38	4	3.1435	3.8937	8.771	chr3	57583215	57557089	-	NM_001660	ADP-ribosylation factor 4	NP_001651	378	This gene is a member of the human ARF gene family whose members encode small guanine nucleotide-binding proteins that stimulate the ADP-ribosyltransferase activity of cholera toxin and play a role in vesicular trafficking and as activators of phospholipase D. The gene products include 5 ARF proteins and 11 ARF-like proteins and constitute one family of the RAS superfamily. The ARF proteins are c…
BCL6	-372	chr3:187463645-187464125	480	61	7	3.1369	4.5685	13.2931	chr3	187463513	187439164	-	NM_001706	B-cell lymphoma 6 protein isoform 1	NP_001697	604	The protein encoded by this gene is a zinc finger transcription factor and contains an N-terminal POZ domain. This protein acts as a sequence-specific repressor of transcription, and has been shown to modulate the transcription of START-dependent IL-4 responses of B cells. This protein can interact with a variety of POZ-containing proteins that function as transcription corepressors. This gene is…
TMED7-TICAM2	-879	chr5:114962515-114962995	480	30	3	3.1328	3.5664	7.1821	chr5	114961876	114914338	-	NM_001164469	TRAM adaptor with GOLD domain isoform 2	NP_001157941	100302736	This locus represents naturally occurring read-through transcription between the neighboring transmembrane emp24 protein transport domain containing 7 (TMED7) and toll-like receptor adaptor molecule 2 (TICAM2) genes. Alternative splicing results in multiple transcript variants, one of which encodes a fusion protein that shares sequence identity with the products of each individual gene. This fusi…
TMED7	-879	chr5:114962515-114962995	480	30	3	3.1328	3.5664	7.1821	chr5	114961876	114948904	-	NM_181836	transmembrane emp24 domain-containing protein 7 precursor	NP_861974	51014
MIR4636	1035	chr5:9052732-9053212	480	30	3	3.1328	3.5664	7.1821	chr5	9054007	9053927	-	NR_039779			100616326	microRNAs (miRNAs) are short (20-24 nt) non-coding RNAs that are involved in post-transcriptional regulation of gene expression in multicellular organisms by affecting both the stability and translation of mRNAs. miRNAs are transcribed by RNA polymerase II as part of capped and polyadenylated primary transcripts (pri-miRNAs) that can be either protein-coding or non-coding. The primary transcript …
EID1	-490	chr15:49169559-49170039	480	30	3	3.1328	3.5664	7.1821	chr15	49170289	49172380	+	NM_014335	EP300-interacting inhibitor of differentiation 1	NP_055150	23741
AHCYL1	-1165	chr1:110545164-110545644	480	30	3	3.1328	3.5664	7.1821	chr1	110546569	110566364	+	NM_001242676	putative adenosylhomocysteinase 2 isoform b	NP_001229605	10768	The protein encoded by this gene interacts with inositol 1,4,5-trisphosphate receptor, type 1 and may be involved in the conversion of S-adenosyl-L-homocysteine to L-homocysteine and adenosine. Several transcript variants encoding two different isoforms have been found for this gene. [provided by RefSeq, Jun 2011].
LRRC1	1709	chr6:53661246-53661726	480	45	5	3.1196	4.1447	10.1019	chr6	53659777	53788919	+	NM_018214	leucine-rich repeat-containing protein 1	NP_060684	55227
GOT1L1	1447	chr8:37795960-37796440	480	45	5	3.1196	4.1447	10.1019	chr8	37797647	37791799	-	NM_152413	putative aspartate aminotransferase, cytoplasmic 2	NP_689626	137362
TRAM1	1566	chr8:71518888-71519368	480	22	2	3.1154	3.1427	5.6008	chr8	71520694	71485452	-	NM_014294	translocating chain-associated membrane protein 1	NP_055109	23471	This gene encodes a multi-pass membrane protein that is part of the mammalian endoplasmic reticulum. The encoded protein influences glycosylation and facilitates the translocation of secretory proteins across the endoplasmic reticulum membrane by regulating which domains of the nascent polypeptide chain are visible to the cytosol during a translocational pause. [provided by RefSeq, Oct 2009]. Seq…
SP8	-1120	chr7:20827388-20827868	480	22	2	3.1154	3.1427	5.6008	chr7	20826508	20821893	-	NM_198956	transcription factor Sp8 isoform 2	NP_945194	221833	The protein encoded by this gene is an SP family transcription factor that in mouse has been shown to be essential for proper limb development. Two transcript variants encoding different isoforms have been found for this gene. [provided by RefSeq, Jun 2011].
PDCL3	148	chr2:101179325-101179805	480	22	2	3.1154	3.1427	5.6008	chr2	101179417	101193201	+	NM_024065	phosducin-like protein 3	NP_076970	79031	This gene encodes a member of the phosducin-like protein family and is a putative modulator of heterotrimeric G proteins. The protein shares extensive amino acid sequence homology with phosducin. Members of the phosducin-like protein family have been shown to bind to the beta-gamma subunits of G proteins. [provided by RefSeq, Jul 2008].
MTSS1	240	chr8:125740250-125740730	480	22	2	3.1154	3.1427	5.6008	chr8	125740730	125563027	-	NM_014751	metastasis suppressor protein 1	NP_055566	9788
LOC100125556	1274	chr3:125636477-125636957	480	22	2	3.1154	3.1427	5.6008	chr3	125635443	125648867	+	NR_024251			100125556
TMEM170B	899	chr6:11539169-11539649	480	37	4	3.1058	3.8748	8.5082	chr6	11538510	11583757	+	NM_001100829	transmembrane protein 170B	NP_001094299	100113407
VCP	942	chr9:35071557-35072037	480	29	3	3.0853	3.5427	6.9173	chr9	35072739	35056064	-	NM_007126	transitional endoplasmic reticulum ATPase	NP_009057	7415	The protein encoded by this gene is a member of a family that includes putative ATP-binding proteins involved in vesicle transport and fusion, 26S proteasome function, and assembly of peroxisomes. This protein, as a structural protein, is associated with clathrin, and heat-shock protein Hsc70, to form a complex. It has been implicated in a number of cellular events that are regulated during mitos…
MS4A14	1503	chr11:60164749-60165229	480	29	3	3.0853	3.5427	6.9173	chr11	60163486	60185228	+	NM_001079692	membrane-spanning 4-domains subfamily A member 14 isoform 2	NP_001073160	84689
LOC100131257	-1139	chr7:7137316-7137796	480	29	3	3.0853	3.5427	6.9173	chr7	7136417	7115400	-	NR_034022			100131257
FXR1	-1163	chr3:180628830-180629310	480	29	3	3.0853	3.5427	6.9173	chr3	180630233	180700539	+	NM_001013439	fragile X mental retardation syndrome-related protein 1 isoform c	NP_001013457	8087	The protein encoded by this gene is an RNA binding protein that interacts with the functionally-similar proteins FMR1 and FXR2. These proteins shuttle between the nucleus and cytoplasm and associate with polyribosomes, predominantly with the 60S ribosomal subunit. Three transcript variants encoding different isoforms have been found for this gene. [provided by RefSeq, Jul 2008].
FAM86EP	-1612	chr4:3958520-3959000	480	29	3	3.0853	3.5427	6.9173	chr4	3957148	3943668	-	NR_024253			348926
CHSY3	1095	chr5:129241377-129241857	480	29	3	3.0853	3.5427	6.9173	chr5	129240522	129522327	+	NM_175856	chondroitin sulfate synthase 3	NP_787052	337876	CSS3 is a glycosyltransferase that has both glucuronyltransferase and N-acetylgalactosaminyltransferase activities (Yada et al., 2003 [PubMed 12907687]).[supplied by OMIM, Mar 2008].
TMTC1	-809	chr12:29938261-29938741	480	36	4	3.0672	3.8555	8.2463	chr12	29937692	29653745	-	NM_175861	transmembrane and TPR repeat-containing protein 1 isoform 2	NP_787057	83857
SLC16A13	-732	chr17:6938421-6938901	480	36	4	3.0672	3.8555	8.2463	chr17	6939393	6943440	+	NM_201566	monocarboxylate transporter 13	NP_963860	201232
PIPOX	-480	chr17:27369197-27369677	480	36	4	3.0672	3.8555	8.2463	chr17	27369917	27384236	+	NM_016518	peroxisomal sarcosine oxidase	NP_057602	51268
PARN	1986	chr16:14721902-14722382	480	36	4	3.0672	3.8555	8.2463	chr16	14724128	14529556	-	NM_001134477	poly(A)-specific ribonuclease PARN isoform 2	NP_001127949	5073	The protein encoded by this gene is a 3'-exoribonuclease, with similarity to the RNase D family of 3'-exonucleases. It prefers poly(A) as the substrate, hence, efficiently degrades poly(A) tails of mRNAs. Exonucleolytic degradation of the poly(A) tail is often the first step in the decay of eukaryotic mRNAs. This protein is also involved in silencing of certain maternal mRNAs during oocyte matura…
CPEB4	-1780	chr5:173313310-173313790	480	36	4	3.0672	3.8555	8.2463	chr5	173315330	173387313	+	NM_030627	cytoplasmic polyadenylation element-binding protein 4	NP_085130	80315
TMEM120A	-898	chr7:75624650-75625130	480	43	5	3.0552	4.1125	9.5811	chr7	75623992	75616154	-	NM_031925	transmembrane protein 120A	NP_114131	83862
PRSS30P	-839	chr16:2893351-2893831	480	43	5	3.0552	4.1125	9.5811	chr16	2892752	2889573	-	NR_026864			124221
C14orf126	646	chr14:31925794-31926274	480	43	5	3.0552	4.1125	9.5811	chr14	31926680	31915242	-	NM_080664	probable D-tyrosyl-tRNA(Tyr) deacylase 2	NP_542395	112487
ZNFX1	-186	chr20:47894702-47895182	480	21	2	3.051	3.1105	5.3326	chr20	47894756	47862438	-	NM_021035	NFX1-type zinc finger-containing protein 1	NP_066363	57169
RICTOR	1868	chr5:39072393-39072873	480	21	2	3.051	3.1105	5.3326	chr5	39074501	38938021	-	NM_152756	rapamycin-insensitive companion of mTOR	NP_689969	253260	RICTOR and MTOR (FRAP1; MIM 601231) are components of a protein complex that integrates nutrient- and growth factor-derived signals to regulate cell growth (Sarbassov et al., 2004 [PubMed 15268862]).[supplied by OMIM, Mar 2008]. Publication Note: This RefSeq record includes a subset of the publications that are available for this gene. Please see the Gene record to access additional publications.
LOC100134713	-195	chr7:140396832-140397312	480	21	2	3.051	3.1105	5.3326	chr7	140396877	140395135	-	NR_024454			100134713
CPNE9	305	chr3:9745574-9746054	480	21	2	3.051	3.1105	5.3326	chr3	9745509	9771592	+	NM_153635	copine-9	NP_705899	151835
PRR7	-921	chr5:176872634-176873114	480	28	3	3.0362	3.5181	6.6535	chr5	176873795	176883287	+	NM_001174101	proline-rich protein 7	NP_001167572	80758
PATE4	649	chr11:125703619-125704099	480	28	3	3.0362	3.5181	6.6535	chr11	125703210	125709967	+	NM_001144874	prostate and testis expressed protein 4	NP_001138346	399968
C16orf62	1465	chr16:19567961-19568441	480	28	3	3.0362	3.5181	6.6535	chr16	19566736	19712485	+	NM_020314	hypothetical protein LOC57020	NP_064710	57020
ATP2A3	788	chr17:3866730-3867210	480	28	3	3.0362	3.5181	6.6535	chr17	3867758	3827162	-	NM_174956	sarcoplasmic/endoplasmic reticulum calcium ATPase 3 isoform c	NP_777616	489	This gene encodes one of the SERCA Ca(2+)-ATPases, which are intracellular pumps located in the sarcoplasmic or endoplasmic reticula of muscle cells. This enzyme catalyzes the hydrolysis of ATP coupled with the translocation of calcium from the cytosol to the sarcoplasmic reticulum lumen, and is involved in calcium sequestration associated with muscular excitation and contraction. Alternative spl…
ANXA1	-1609	chr9:75764931-75765411	480	28	3	3.0362	3.5181	6.6535	chr9	75766780	75785307	+	NM_000700	annexin A1	NP_000691	301	Annexin I belongs to a family of Ca(2+)-dependent phospholipid binding proteins which have a molecular weight of approximately 35,000 to 40,000 and are preferentially located on the cytosolic face of the plasma membrane. Annexin I protein has an apparent relative molecular mass of 40 kDa, with phospholipase A2 inhibitory activity. Since phospholipase A2 is required for the biosynthesis of the pot…
WDR16	1440	chr17:9481143-9481623	480	35	4	3.0275	3.8357	7.9852	chr17	9479943	9546776	+	NM_001080556	WD repeat-containing protein 16 isoform c	NP_001074025	146845	WD repeat-containing proteins, such as WDR16, play crucial roles in a wide range of physiologic functions, including signal transduction, RNA processing, remodeling the cytoskeleton, regulation of vesicular traffic, and cell division (Silva et al., 2005 [PubMed 15967112]).[supplied by OMIM, Mar 2008].
SEMA6D	1756	chr15:48012201-48012681	480	35	4	3.0275	3.8357	7.9852	chr15	48010685	48057677	+	NM_024966	semaphorin-6D isoform 6 precursor	NP_079242	80031	Semaphorins are a large family, including both secreted and membrane associated proteins, many of which have been implicated as inhibitors or chemorepellents in axon pathfinding, fasciculation and branching, and target selection. All semaphorins possess a semaphorin (Sema) domain and a PSI domain (found in plexins, semaphorins and integrins) in the N-terminal extracellular portion. Additional seq…
LMAN2	1155	chr5:176777490-176777970	480	35	4	3.0275	3.8357	7.9852	chr5	176778885	176758562	-	NM_006816	vesicular integral-membrane protein VIP36 precursor	NP_006807	10960	This gene encodes a type I transmembrane lectin that shuttles between the endoplasmic reticulum, the Golgi apparatus and the plasma membrane. The encoded protein binds high mannose type glycoproteins and may facilitate their sorting, trafficking and quality control. [provided by RefSeq, Oct 2008].
GABRR1	-575	chr6:89927831-89928311	480	35	4	3.0275	3.8357	7.9852	chr6	89927496	89887222	-	NM_002042	gamma-aminobutyric acid receptor subunit rho-1 precursor	NP_002033	2569	GABA is the major inhibitory neurotransmitter in the mammalian brain where it acts at GABA receptors, which are ligand-gated chloride channels. GABRR1 is a member of the rho subunit family. [provided by RefSeq, Jul 2008]. Publication Note: This RefSeq record includes a subset of the publications that are available for this gene. Please see the Gene record to access additional publications.
OR2G2	-249	chr1:247751172-247751652	480	42	5	3.0219	4.0959	9.3218	chr1	247751661	247752615	+	NM_001001915	olfactory receptor 2G2	NP_001001915	81470	Olfactory receptors interact with odorant molecules in the nose, to initiate a neuronal response that triggers the perception of a smell. The olfactory receptor proteins are members of a large family of G-protein-coupled receptors (GPCR) arising from single coding-exon genes. Olfactory receptors share a 7-transmembrane domain structure with many neurotransmitter and hormone receptors and are resp…
GABRG2	-593	chr5:161493814-161494294	480	42	5	3.0219	4.0959	9.3218	chr5	161494647	161582545	+	NM_000816	gamma-aminobutyric acid receptor subunit gamma-2 isoform 2 precursor	NP_000807	2566	This gene encodes a gamma-aminobutyric acid (GABA) receptor. GABA is the major inhibitory neurotransmitter in the mammlian brain, where it acts at GABA-A receptors, which are ligand-gated chloride channels. GABA-A receptors are pentameric, consisting of proteins from several subunit classes: alpha, beta, gamma, delta and rho. Mutations in this gene have been associated with epilepsy and febrile s…
ZNF648	-792	chr1:182031399-182031879	480	49	6	3.018	4.3163	10.6612	chr1	182030847	182023704	-	NM_001009992	zinc finger protein 648	NP_001009992	127665
ZBTB26	1461	chr9:125692050-125692586	536	63	8	3.013	4.6764	13.3445	chr9	125693779	125680377	-	NM_020924	zinc finger and BTB domain-containing protein 26	NP_065975	57684
OR51V1	-1268	chr11:5222899-5223498	599	83	11	2.9919	5.0809	16.8668	chr11	5221930	5220964	-	NM_001004760	olfactory receptor 51V1	NP_001004760	283111	Olfactory receptors interact with odorant molecules in the nose, to initiate a neuronal response that triggers the perception of a smell. The olfactory receptor proteins are members of a large family of G-protein-coupled receptors (GPCR) arising from single coding-exon genes. Olfactory receptors share a 7-transmembrane domain structure with many neurotransmitter and hormone receptors and are resp…
RTN1	1524	chr14:60095768-60096248	480	55	7	2.9895	4.4947	11.746	chr14	60097532	60062693	-	NM_206852	reticulon-1 isoform C	NP_996734	6252	This gene belongs to the family of reticulon encoding genes. Reticulons are associated with the endoplasmic reticulum, and are involved in neuroendocrine secretion or in membrane trafficking in neuroendocrine cells. This gene is considered to be a specific marker for neurological diseases and cancer, and is a potential molecular target for therapy. Alternative splicing results in multiple transcr…
FREM1	437	chr9:14778854-14779334	480	55	7	2.9895	4.4947	11.746	chr9	14779531	14734663	-	NM_001177704	FRAS1-related extracellular matrix protein 1 isoform 2	NP_001171175	158326	This gene encodes a basement membrane protein that may play a role in craniofacial and renal development. Mutations in this gene have been associated with bifid nose with or without anorectal and renal anomalies. Alternatively spliced transcript variants encoding different isoforms have been described. PubMed ID 19940113 describes one such variant that initiates transcription within a distinct, i…
PLG	1508	chr6:161124492-161124972	480	48	6	2.9887	4.3017	10.404	chr6	161123224	161132904	+	NM_001168338	plasminogen isoform 2 precursor	NP_001161810	5340	The protein encoded by this gene is a secreted blood zymogen that is activated by proteolysis and converted to plasmin and angiostatin. Plasmin dissolves fibrin in blood clots and is an important protease in many other cellular processes while angiostatin inhibits angiogenesis. Defects in this gene are likely a cause of thrombophilia and ligneous conjunctivitis. Two transcript variants encoding d…
AGAP8	-802	chr10:51247097-51247577	480	41	5	2.9878	4.0789	9.0634	chr10	51246535	51224687	-	NM_001077686	arf-GAP with GTPase, ANK repeat and PH	NP_001071154	728404
WFDC5	-561	chr20:43744134-43744614	480	34	4	2.9867	3.8153	7.7251	chr20	43743813	43738092	-	NM_145652	WAP four-disulfide core domain protein 5 precursor	NP_663627	149708	This gene encodes a member of the WAP-type four-disulfide core (WFDC) domain family. Most WFDC proteins contain only one WFDC domain, and this encoded protein contains two WFDC domains. The WFDC domain, or WAP signature motif, contains eight cysteines forming four disulfide bonds at the core of the protein, and functions as a protease inhibitor. Most WFDC gene members are localized to chromosome …
PRDX6	624	chr1:173446869-173447349	480	34	4	2.9867	3.8153	7.7251	chr1	173446485	173457946	+	NM_004905	peroxiredoxin-6	NP_004896	9588	The protein encoded by this gene is a member of the thiol-specific antioxidant protein family. This protein is a bifunctional enzyme with two distinct active sites. It is involved in redox regulation of the cell; it can reduce H(2)O(2) and short chain organic, fatty acid, and phospholipid hydroperoxides. It may play a role in the regulation of phospholipid turnover as well as in protection agains…
PDX1	-585	chr13:28493342-28493822	480	34	4	2.9867	3.8153	7.7251	chr13	28494167	28500451	+	NM_000209	pancreas/duodenum homeobox protein 1	NP_000200	3651	The protein encoded by this gene is a transcriptional activator of several genes, including insulin, somatostatin, glucokinase, islet amyloid polypeptide, and glucose transporter type 2. The encoded nuclear protein is involved in the early development of the pancreas and plays a major role in glucose-dependent regulation of insulin gene expression. Defects in this gene are a cause of pancreatic a…
PATE3	1362	chr11:125659127-125659607	480	34	4	2.9867	3.8153	7.7251	chr11	125658005	125661495	+	NM_001129883	prostate and testis expressed protein 3	NP_001123355	100169851
LMAN1L	-1707	chr15:75103246-75103726	480	34	4	2.9867	3.8153	7.7251	chr15	75105193	75118099	+	NM_021819	protein ERGIC-53-like precursor	NP_068591	79748
WBP11	599	chr12:14955562-14956042	480	27	3	2.9854	3.4927	6.3909	chr12	14956401	14939411	-	NM_016312	WW domain-binding protein 11	NP_057396	51729	This gene encodes a nuclear protein, which colocalizes with mRNA splicing factors and intermediate filament-containing perinuclear networks. This protein has 95% amino acid sequence identity to the mouse Wbp11 protein. It contains two proline-rich regions that bind to the WW domain of Npw38, a nuclear protein, and thus this protein is also called Npw38-binding protein NpwBP. The Npw38-NpwBP compl…
TNFRSF14	-1003	chr1:2486561-2487041	480	27	3	2.9854	3.4927	6.3909	chr1	2487804	2495267	+	NM_003820	tumor necrosis factor receptor superfamily member 14 precursor	NP_003811	8764	The protein encoded by this gene is a member of the TNF-receptor superfamily. This receptor was identified as a cellular mediator of herpes simplex virus (HSV) entry. Binding of HSV viral envelope glycoprotein D (gD) to this receptor protein has been shown to be part of the viral entry mechanism. The cytoplasmic region of this receptor was found to bind to several TRAF family members, which may m…
tAKR	-1359	chr10:4959584-4960064	480	27	3	2.9854	3.4927	6.3909	chr10	4958465	4913858	-	NR_026743			389932
SLC5A12	475	chr11:26742859-26743339	480	27	3	2.9854	3.4927	6.3909	chr11	26743574	26688565	-	NM_178498	sodium-coupled monocarboxylate transporter 2	NP_848593	159963	Normal blood lactate is maintained at about 1.5 mM, and little filtered lactate is excreted in urine. Reabsorption of lactate is mediated by the low-affinity Na(+)-coupled lactate transporter SLC5A12 in the initial part of the proximal tubule and by the high-affinity Na(+)-coupled lactate transporter SLC5A8 (MIM 608044) in the distal proximal tubule (Gopal et al., 2007 [PubMed 17692818]).[supplie…
SCGN	1767	chr6:25653955-25654435	480	27	3	2.9854	3.4927	6.3909	chr6	25652428	25702008	+	NM_006998	secretagogin precursor	NP_008929	10590	The encoded protein is a secreted calcium-binding protein which is found in the cytoplasm. It is related to calbindin D-28K and calretinin. This protein is thought to be involved in KCL-stimulated calcium flux and cell proliferation. [provided by RefSeq, Jul 2008].
OR4K2	-597	chr14:20343589-20344069	480	27	3	2.9854	3.4927	6.3909	chr14	20344426	20345371	+	NM_001005501	olfactory receptor 4K2	NP_001005501	390431	Olfactory receptors interact with odorant molecules in the nose, to initiate a neuronal response that triggers the perception of a smell. The olfactory receptor proteins are members of a large family of G-protein-coupled receptors (GPCR) arising from single coding-exon genes. Olfactory receptors share a 7-transmembrane domain structure with many neurotransmitter and hormone receptors and are resp…
ADAMTS6	-1959	chr5:64779423-64779903	480	27	3	2.9854	3.4927	6.3909	chr5	64777704	64444562	-	NM_197941	A disintegrin and metalloproteinase with thrombospondin motifs 6 preproprotein	NP_922932	11174	This gene encodes a member of the ADAMTS (a disintegrin and metalloproteinase with thrombospondin motifs) protein family. Members of the family share several distinct protein modules, including a propeptide region, a metalloproteinase domain, a disintegrin-like domain, and a thrombospondin type 1 (TS) motif. Individual members of this family differ in the number of C-terminal TS motifs, and some …
HS3ST5	550	chr6:114383251-114383731	480	20	2	2.9836	3.0768	5.0656	chr6	114384041	114376749	-	NM_153612	heparan sulfate glucosamine 3-O-sulfotransferase 5	NP_705840	222537	HS3ST5 belongs to a group of heparan sulfate 3-O-sulfotransferases (EC 2.8.2.23) that transfer sulfate from 3-prime-phosphoadenosine 5-prime phosphosulfate (PAPS) to heparan sulfate and heparin (Mochizuki et al., 2003 [PubMed 12740361]).[supplied by OMIM, Mar 2008]. Sequence Note: The RefSeq transcript and protein were derived from genomic sequence to make the sequence consistent with the referen…
HDAC2	-948	chr6:114293067-114293547	480	20	2	2.9836	3.0768	5.0656	chr6	114292359	114257319	-	NM_001527	histone deacetylase 2	NP_001518	3066	This gene product belongs to the histone deacetylase family. Histone deacetylases act via the formation of large multiprotein complexes, and are responsible for the deacetylation of lysine residues at the N-terminal regions of core histones (H2A, H2B, H3 and H4). This protein forms transcriptional repressor complexes by associating with many different proteins, including YY1, a mammalian zinc-fin…
ARHGAP5	1720	chr14:32547974-32548454	480	20	2	2.9836	3.0768	5.0656	chr14	32546494	32628934	+	NM_001173	rho GTPase-activating protein 5 isoform b	NP_001164	394	Rho GTPase activating protein 5 negatively regulates RHO GTPases, a family which may mediate cytoskeleton changes by stimulating the hydrolysis of bound GTP. Two transcript variants encoding different isoforms have been found for this gene. [provided by RefSeq, Jul 2008].
MIR4770	-1324	chrX:6303031-6303626	595	61	8	2.967	4.6534	12.5796	chrX	6302004	6301946	-	NR_039927			100616373	microRNAs (miRNAs) are short (20-24 nt) non-coding RNAs that are involved in post-transcriptional regulation of gene expression in multicellular organisms by affecting both the stability and translation of mRNAs. miRNAs are transcribed by RNA polymerase II as part of capped and polyadenylated primary transcripts (pri-miRNAs) that can be either protein-coding or non-coding. The primary transcript …
AGL	699	chr1:100316989-100317469	480	47	6	2.9588	4.2868	9.8919	chr1	100316530	100389579	+	NM_000646	glycogen debranching enzyme isoform 3	NP_000637	178	This gene encodes the glycogen debrancher enzyme which is involved in glycogen degradation. This enzyme has two independent catalytic activities which occur at different sites on the protein: a 4-alpha-glucotransferase activity and a amylo-1,6-glucosidase activity. Mutations in this gene are associated with glycogen storage disease although a wide range of enzymatic and clinical variability occur…
TMPRSS11E	129	chr4:69313055-69313535	480	40	5	2.9529	4.0614	8.5492	chr4	69313166	69363322	+	NM_014058	transmembrane protease serine 11E precursor	NP_054777	28983
SLC35B1	1515	chr17:47783527-47784007	480	40	5	2.9529	4.0614	8.5492	chr17	47785282	47778689	-	NM_005827	solute carrier family 35 member B1	NP_005818	10237
RASSF6	-759	chr4:74486859-74487339	480	40	5	2.9529	4.0614	8.5492	chr4	74486340	74438861	-	NM_201431	ras association domain-containing protein 6 isoform b	NP_958834	166824	RASSF6 is a member of the RAS association (RA) domain family of RAS effectors/tumor suppressors that mediate some of the growth inhibitory properties of RAS (see HRAS; MIM 190020) oncogenes (Eckfeld et al., 2004 [PubMed 15574778]).[supplied by OMIM, Feb 2009].
PSTPIP1	-946	chr15:77286278-77286758	480	40	5	2.9529	4.0614	8.5492	chr15	77287464	77329671	+	NM_003978	proline-serine-threonine phosphatase-interacting protein 1	NP_003969	9051	The protein encoded by this gene binds to the cytoplasmic tail of CD2, an effector of T cell activation and adhesion, negatively affecting CD2-triggered T cell activation. The encoded protein appears to be a scaffold protein and a regulator of the actin cytoskeleton. It has also been shown to bind ABL1, PTPN18, WAS, CD2AP, and PTPN12. Mutations in this gene are a cause of PAPA syndrome. [provided…
MIR1244-3	648	chr12:9391259-9391739	480	40	5	2.9529	4.0614	8.5492	chr12	9392147	9392065	-	NR_036263			100422872	microRNAs (miRNAs) are short (20-24 nt) non-coding RNAs that are involved in post-transcriptional regulation of gene expression in multicellular organisms by affecting both the stability and translation of mRNAs. miRNAs are transcribed by RNA polymerase II as part of capped and polyadenylated primary transcripts (pri-miRNAs) that can be either protein-coding or non-coding. The primary transcript …
MIR1244-2	648	chr12:9391259-9391739	480	40	5	2.9529	4.0614	8.5492	chr12	9392147	9392065	-	NR_036262			100422885	microRNAs (miRNAs) are short (20-24 nt) non-coding RNAs that are involved in post-transcriptional regulation of gene expression in multicellular organisms by affecting both the stability and translation of mRNAs. miRNAs are transcribed by RNA polymerase II as part of capped and polyadenylated primary transcripts (pri-miRNAs) that can be either protein-coding or non-coding. The primary transcript …
MIR1244-1	648	chr12:9391259-9391739	480	40	5	2.9529	4.0614	8.5492	chr12	9392147	9392065	-	NR_036052			100302285	microRNAs (miRNAs) are short (20-24 nt) non-coding RNAs that are involved in post-transcriptional regulation of gene expression in multicellular organisms by affecting both the stability and translation of mRNAs. miRNAs are transcribed by RNA polymerase II as part of capped and polyadenylated primary transcripts (pri-miRNAs) that can be either protein-coding or non-coding. The primary transcript …
LOC728606	868	chr18:24282494-24282974	480	40	5	2.9529	4.0614	8.5492	chr18	24283602	24267584	-	NR_024259			728606
LOC339685	500	chr22:47741580-47742060	480	40	5	2.9529	4.0614	8.5492	chr22	47741320	47769291	+	NR_038922			339685
TSTD1	-557	chr1:161009091-161009571	480	33	4	2.9447	3.7943	7.2078	chr1	161008774	161007421	-	NM_001113205	thiosulfate sulfurtransferase/rhodanese-like	NP_001106676	100131187
TPCN2	-1848	chr11:68814261-68814741	480	33	4	2.9447	3.7943	7.2078	chr11	68816349	68858072	+	NM_139075	two pore calcium channel protein 2	NP_620714	219931	This gene encodes a putative cation-selective ion channel with two repeats of a six-transmembrane-domain. The protein localizes to lysosomal membranes and enables nicotinic acid adenine dinucleotide phosphate (NAADP) -induced calcium ion release from lysosome-related stores. This ubiquitously expressed gene has elevated expression in liver and kidney. Two common nonsynonymous SNPs in this gene st…
TEK	720	chr9:27109626-27110106	480	33	4	2.9447	3.7943	7.2078	chr9	27109146	27230172	+	NM_000459	angiopoietin-1 receptor precursor	NP_000450	7010	The TEK receptor tyrosine kinase is expressed almost exclusively in endothelial cells in mice, rats, and humans. This receptor possesses a unique extracellular domain containing 2 immunoglobulin-like loops separated by 3 epidermal growth factor-like repeats that are connected to 3 fibronectin type III-like repeats. The ligand for the receptor is angiopoietin-1. Defects in TEK are associated with …
RYBP	217	chr3:72495317-72495797	480	33	4	2.9447	3.7943	7.2078	chr3	72495774	72423743	-	NM_012234	RING1 and YY1-binding protein	NP_036366	23429
OR52N5	418	chr11:5799239-5799719	480	33	4	2.9447	3.7943	7.2078	chr11	5799897	5798863	-	NM_001001922	olfactory receptor 52N5	NP_001001922	390075	Olfactory receptors interact with odorant molecules in the nose, to initiate a neuronal response that triggers the perception of a smell. The olfactory receptor proteins are members of a large family of G-protein-coupled receptors (GPCR) arising from single coding-exon genes. Olfactory receptors share a 7-transmembrane domain structure with many neurotransmitter and hormone receptors and are resp…
MIR624	1422	chr14:31482286-31482766	480	33	4	2.9447	3.7943	7.2078	chr14	31483948	31483851	-	NR_030354			693209	microRNAs (miRNAs) are short (20-24 nt) non-coding RNAs that are involved in post-transcriptional regulation of gene expression in multicellular organisms by affecting both the stability and translation of mRNAs. miRNAs are transcribed by RNA polymerase II as part of capped and polyadenylated primary transcripts (pri-miRNAs) that can be either protein-coding or non-coding. The primary transcript …
LOC283710	-1666	chr15:31524476-31524956	480	33	4	2.9447	3.7943	7.2078	chr15	31523050	31514970	-	NM_001243538	hypothetical protein LOC283710	NP_001230467	283710
INTS7	-1944	chr1:212210706-212211186	480	33	4	2.9447	3.7943	7.2078	chr1	212209002	212113740	-	NM_001199809	integrator complex subunit 7 isoform 4	NP_001186738	25896	This gene encodes a subunit of the integrator complex. The integrator complex associates with the C-terminal domain of RNA polymerase II and mediates 3'-end processing of the small nuclear RNAs U1 and U2. Alternatively spliced transcript variants encoding multiple isoforms have been observed for this gene. [provided by RefSeq, Dec 2010].
CD274	-526	chr9:5449736-5450216	480	33	4	2.9447	3.7943	7.2078	chr9	5450502	5470567	+	NM_014143	programmed cell death 1 ligand 1 precursor	NP_054862	29126
C9orf66	-242	chr9:215895-216375	480	33	4	2.9447	3.7943	7.2078	chr9	215893	213107	-	NM_152569	hypothetical protein LOC157983	NP_689782	157983
AK7	-1449	chr14:96856758-96857238	480	33	4	2.9447	3.7943	7.2078	chr14	96858447	96955112	+	NM_152327	adenylate kinase 7	NP_689540	122481
TCTE1	1332	chr6:44263886-44264366	480	26	3	2.9327	3.4663	6.1293	chr6	44265458	44247896	-	NM_182539	T-complex-associated testis-expressed protein 1	NP_872345	202500
RORA	1536	chr15:61519726-61520206	480	26	3	2.9327	3.4663	6.1293	chr15	61521502	60780482	-	NM_134261	nuclear receptor ROR-alpha isoform a	NP_599023	6095	The protein encoded by this gene is a member of the NR1 subfamily of nuclear hormone receptors. It can bind as a monomer or as a homodimer to hormone response elements upstream of several genes to enhance the expression of those genes. The specific functions of this protein are not known, but it has been shown to interact with NM23-2, a nucleoside diphosphate kinase involved in organogenesis and …
PREPL	3	chr2:44588457-44588937	480	26	3	2.9327	3.4663	6.1293	chr2	44588700	44544747	-	NM_001171613	prolyl endopeptidase-like isoform 4	NP_001165084	9581	The protein encoded by this gene belongs to the prolyl oligopeptidase subfamily of serine peptidases. Mutations in this gene have been associated with hypotonia-cystinuria syndrome, also known as the 2p21 deletion syndrome. Several alternatively spliced transcript variants encoding either the same or different isoforms have been described for this gene.[provided by RefSeq, Jan 2010].
HORMAD1	-1875	chr1:150694999-150695479	480	26	3	2.9327	3.4663	6.1293	chr1	150693364	150670534	-	NM_001199829	HORMA domain-containing protein 1 isoform 2	NP_001186758	84072	This gene encodes a HORMA domain-containing protein. HORMA domains are involved in chromatin binding and play a role in cell cycle regulation. The encoded protein may play a role in meiosis, and expression of this gene is a potential marker for cancer. A pseudogene of this gene is located on the long arm of chromosome 6. Alternatively spliced transcript variants encoding multiple isoforms have be…
FAM174B	903	chr15:93197888-93198368	480	26	3	2.9327	3.4663	6.1293	chr15	93199031	93160678	-	NM_207446	membrane protein FAM174B	NP_997329	400451
EBLN1	-604	chr10:22499276-22499756	480	26	3	2.9327	3.4663	6.1293	chr10	22498912	22497742	-	NM_001199938	endogenous Bornavirus-like nucleoprotein 1	NP_001186867	340900
COL21A1	544	chr6:56111594-56112074	480	26	3	2.9327	3.4663	6.1293	chr6	56112378	55921387	-	NM_030820	collagen alpha-1(XXI) chain precursor	NP_110447	81578	This gene encodes the alpha chain of type XXI collagen, a member of the FACIT collagen family (fibril-associated collagens with interrupted helices). Type XXI collagen is localized to tissues containing type I collagen so, like other members of this collagen family, it may serve to maintain the integrity of the extracellular matrix. An alternatively spliced transcript variant has been described, …
CHRNA1	-584	chr2:175629544-175630024	480	26	3	2.9327	3.4663	6.1293	chr2	175629200	175612322	-	NM_000079	acetylcholine receptor subunit alpha isoform b precursor	NP_000070	1134	The muscle acetylcholine receptor consiststs of 5 subunits of 4 different types: 2 alpha isoforms and 1 each of beta, gamma, and delta subunits.2 This gene encodes an alpha subunit that plays a role in acetlycholine binding/channel gating. Alternatively spliced transcript variants encoding different isoforms have been identified. [provided by RefSeq, Jul 2008].
TNFRSF19	675	chr13:24153933-24154413	480	39	5	2.9171	4.0435	8.2934	chr13	24153498	24243412	+	NM_018647	tumor necrosis factor receptor superfamily member 19 isoform 1 precursor	NP_061117	55504	The protein encoded by this gene is a member of the TNF-receptor superfamily. This receptor is highly expressed during embryonic development. It has been shown to interact with TRAF family members, and to activate JNK signaling pathway when overexpressed in cells. This receptor is capable of inducing apoptosis by a caspase-independent mechanism, and it is thought to play an essential role in embr…
SPAG16	450	chr2:214149308-214149822	514	39	5	2.9171	4.0435	8.2934	chr2	214149115	214182702	+	NM_001025436	sperm-associated antigen 16 protein isoform 2	NP_001020607	79582	Cilia and flagella are comprised of a microtubular backbone, the axoneme, which is organized by the basal body and surrounded by plasma membrane. SPAG16 encodes 2 major proteins that associate with the axoneme of sperm tail and the nucleus of postmeiotic germ cells, respectively (Zhang et al., 2007 [PubMed 17699735]).[supplied by OMIM, Jul 2008].
SNORA5B	-920	chr7:45146378-45146858	480	39	5	2.9171	4.0435	8.2934	chr7	45145698	45145566	-	NR_002990			677795
PIK3C3	-139	chr18:39534819-39535299	480	39	5	2.9171	4.0435	8.2934	chr18	39535198	39661446	+	NM_002647	phosphatidylinositol 3-kinase catalytic subunit type 3	NP_002638	5289
MUTED-TXNDC5	-835	chr6:8065237-8065727	490	39	5	2.9171	4.0435	8.2934	chr6	8064647	7881482	-	NR_037616			100526836	This locus represents naturally occurring read-through transcription between the neighboring MUTED (muted homolog) and TXNDC5 (thioredoxin domain containing 5) genes on chromosome 6. The read-through transcript is a candidate for nonsense-mediated mRNA decay (NMD) and is unlikely to produce a protein product. [provided by RefSeq, Dec 2010]. Sequence Note: This RefSeq record was created from trans…
MUTED	-835	chr6:8065237-8065727	490	39	5	2.9171	4.0435	8.2934	chr6	8064647	8013799	-	NM_001199322	protein Muted homolog isoform 2	NP_001186251	63915	This gene encodes a component of BLOC-1 (biogenesis of lysosome-related organelles complex 1). Components of this complex are involved in the biogenesis of organelles such as melanosomes and platelet-dense granules. A mouse model for Hermansky-Pudlak Syndrome is mutated in the murine version of this gene. Alternative splicing results in multiple transcript variants. Read-through transcription exi…
MIR103B2	-475	chr20:3898445-3898925	480	39	5	2.9171	4.0435	8.2934	chr20	3898210	3898148	-	NR_031722			100302282	microRNAs (miRNAs) are short (20-24 nt) non-coding RNAs that are involved in post-transcriptional regulation of gene expression in multicellular organisms by affecting both the stability and translation of mRNAs. miRNAs are transcribed by RNA polymerase II as part of capped and polyadenylated primary transcripts (pri-miRNAs) that can be either protein-coding or non-coding. The primary transcript …
MID1	-1175	chrX:10536578-10537058	480	39	5	2.9171	4.0435	8.2934	chrX	10535643	10473380	-	NM_001193281	midline-1 isoform 6	NP_001180210	4281	The protein encoded by this gene is a member of the tripartite motif (TRIM) family, also known as the 'RING-B box-coiled coil' (RBCC) subgroup of RING finger proteins. The TRIM motif includes three zinc-binding domains, a RING, a B-box type 1 and a B-box type 2, and a coiled-coil region. This protein forms homodimers which associate with microtubules in the cytoplasm. The protein is likely involv…
LOC100306951	675	chr17:1420647-1421127	480	39	5	2.9171	4.0435	8.2934	chr17	1420212	1421390	+	NR_028514			100306951
KIF27	701	chr9:86535401-86535881	480	39	5	2.9171	4.0435	8.2934	chr9	86536342	86451614	-	NM_017576	kinesin-like protein KIF27	NP_060046	55582
C1QTNF9	-29	chr13:24883446-24883926	480	39	5	2.9171	4.0435	8.2934	chr13	24883715	24896669	+	NM_178540	complement C1q tumor necrosis factor-related protein 9A precursor	NP_848635	338872
ZNF643	-599	chr1:40915497-40915977	480	19	2	2.913	3.0414	4.8001	chr1	40916336	40929390	+	NM_023070	zinc finger protein 643	NP_075558	65243
CSDE1	1270	chr1:115299161-115299641	480	19	2	2.913	3.0414	4.8001	chr1	115300671	115259533	-	NM_001242893	cold shock domain-containing protein E1 isoform 2	NP_001229822	7812
CHRNA5	-312	chr15:78857309-78857789	480	19	2	2.913	3.0414	4.8001	chr15	78857861	78887611	+	NM_000745	neuronal acetylcholine receptor subunit alpha-5 precursor	NP_000736	1138	The protein encoded by this gene is a nicotinic acetylcholine receptor subunit and a member of a superfamily of ligand-gated ion channels that mediate fast signal transmission at synapses. These receptors are thought to be heteropentamers composed of separate but similar subunits. Defects in this gene have been linked to susceptibility to lung cancer type 2 (LNCR2).[provided by RefSeq, Jun 2010].…
DEPTOR	-730	chr8:120884841-120885497	656	52	7	2.9097	4.4549	10.7278	chr8	120885899	121063157	+	NM_022783	DEP domain-containing mTOR-interacting protein	NP_073620	64798
ZNF585A	91	chr19:37663284-37663764	480	32	4	2.9015	3.7727	6.9508	chr19	37663615	37641000	-	NM_152655	zinc finger protein 585A	NP_689868	199704
SPAST	52	chr2:32288491-32288971	480	32	4	2.9015	3.7727	6.9508	chr2	32288679	32382706	+	NM_199436	spastin isoform 2	NP_955468	6683	This gene encodes a member of the AAA (ATPases associated with a variety of cellular activities) protein family. Members of this protein family share an ATPase domain and have roles in diverse cellular processes including membrane trafficking, intracellular motility, organelle biogenesis, protein folding, and proteolysis. The encoded ATPase may be involved in the assembly or function of nuclear p…
NDUFB9	383	chr8:125551485-125551965	480	32	4	2.9015	3.7727	6.9508	chr8	125551342	125562227	+	NM_005005	NADH dehydrogenase [ubiquinone] 1 beta subcomplex subunit 9	NP_004996	4715
MYO18A	-513	chr17:27507680-27508160	480	32	4	2.9015	3.7727	6.9508	chr17	27507407	27400527	-	NM_203318	myosin-XVIIIa isoform b	NP_976063	399687
LOC100505776	-1754	chr18:69247706-69248186	480	32	4	2.9015	3.7727	6.9508	chr18	69246192	69187199	-	NR_038326			100505776
FERMT2	1800	chr14:53415775-53416255	480	32	4	2.9015	3.7727	6.9508	chr14	53417815	53326205	-	NM_001135000	fermitin family homolog 2 isoform 3	NP_001128472	10979
CTSL2	-1994	chr9:99803679-99804159	480	32	4	2.9015	3.7727	6.9508	chr9	99801925	99791958	-	NM_001201575	cathepsin L2 preproprotein	NP_001188504	1515	The protein encoded by this gene, a member of the peptidase C1 family, is a lysosomal cysteine proteinase that may play an important role in corneal physiology. This gene is expressed in colorectal and breast carcinomas but not in normal colon, mammary gland, or peritumoral tissues, suggesting a possible role for this gene in tumor processes. Alternatively spliced variants, encoding the same prot…
CAST	1203	chr5:96039455-96039935	480	32	4	2.9015	3.7727	6.9508	chr5	96038492	96110385	+	NM_173060	calpastatin isoform b	NP_775083	831	The protein encoded by this gene is an endogenous calpain (calcium-dependent cysteine protease) inhibitor. It consists of an N-terminal domain L and four repetitive calpain-inhibition domains (domains 1-4), and it is involved in the proteolysis of amyloid precursor protein. The calpain/calpastatin system is involved in numerous membrane fusion events, such as neural vesicle exocytosis and platele…
AACS	-1766	chr12:125547918-125548398	480	32	4	2.9015	3.7727	6.9508	chr12	125549924	125627871	+	NM_023928	acetoacetyl-CoA synthetase	NP_076417	65985
ZNF860	-1912	chr3:32021006-32021700	694	45	6	2.8972	4.2559	9.383	chr3	32023265	32033228	+	NM_001137674	zinc finger protein 860	NP_001131146	344787
TCL6	1805	chr14:96119079-96119559	480	45	6	2.8972	4.2559	9.383	chr14	96117514	96139789	+	NR_028288			27004
GRB10	-1043	chr7:50861962-50862442	480	45	6	2.8972	4.2559	9.383	chr7	50861159	50657759	-	NM_001001555	growth factor receptor-bound protein 10 isoform c	NP_001001555	2887	The product of this gene belongs to a small family of adapter proteins that are known to interact with a number of receptor tyrosine kinases and signaling molecules. This gene encodes a growth factor receptor-binding protein that interacts with insulin receptors and insulin-like growth-factor receptors. Overexpression of some isoforms of the encoded protein inhibits tyrosine kinase activity and r…
USP43	854	chr17:9549563-9550043	480	58	8	2.8952	4.6175	11.8204	chr17	9548949	9633003	+	NM_153210	ubiquitin carboxyl-terminal hydrolase 43	NP_694942	124739
CCDC71	1704	chr3:49201835-49202327	492	58	8	2.8952	4.6175	11.8204	chr3	49203785	49199967	-	NM_022903	coiled-coil domain-containing protein 71	NP_075054	64925
TRAF3IP2	1556	chr6:111925678-111926158	480	38	5	2.8804	4.0252	8.0387	chr6	111927474	111880142	-	NM_147686	adapter protein CIKS isoform 2	NP_679211	10758	This gene encodes a protein involved in regulating responses to cytokines by members of the Rel/NF-kappaB transcription factor family. These factors play a central role in innate immunity in response to pathogens, inflammatory signals and stress. This gene product interacts with TRAF proteins (tumor necrosis factor receptor-associated factors) and either I-kappaB kinase or MAP kinase to activate …
SOCS7	-1873	chr17:36505893-36506373	480	38	5	2.8804	4.0252	8.0387	chr17	36508006	36561846	+	NM_014598	suppressor of cytokine signaling 7	NP_055413	30837
MRPL42P5	-1175	chr15:40825684-40826164	480	38	5	2.8804	4.0252	8.0387	chr15	40824749	40824082	-	NR_002208			359821
MIR3162	444	chr11:59361947-59362427	480	38	5	2.8804	4.0252	8.0387	chr11	59362631	59362549	-	NR_036120			100422880	microRNAs (miRNAs) are short (20-24 nt) non-coding RNAs that are involved in post-transcriptional regulation of gene expression in multicellular organisms by affecting both the stability and translation of mRNAs. miRNAs are transcribed by RNA polymerase II as part of capped and polyadenylated primary transcripts (pri-miRNAs) that can be either protein-coding or non-coding. The primary transcript …
LOC339874	1287	chr3:131098792-131099272	480	38	5	2.8804	4.0252	8.0387	chr3	131100319	131043935	-	NR_038976			339874
KIAA1377	-1706	chr11:101783799-101784279	480	38	5	2.8804	4.0252	8.0387	chr11	101785745	101871793	+	NM_020802	hypothetical protein LOC57562	NP_065853	57562
TBCC	57	chr6:42713587-42714067	480	25	3	2.878	3.439	5.6101	chr6	42713884	42712233	-	NM_003192	tubulin-specific chaperone C	NP_003183	6903	Cofactor C is one of four proteins (cofactors A, D, E, and C) involved in the pathway leading to correctly folded beta-tubulin from folding intermediates. Cofactors A and D are believed to play a role in capturing and stabilizing beta-tubulin intermediates in a quasi-native confirmation. Cofactor E binds to the cofactor D/beta-tubulin complex; interaction with cofactor C then causes the release o…
PRR13	813	chr12:53836005-53836485	480	25	3	2.878	3.439	5.6101	chr12	53835432	53840427	+	NM_018457	proline-rich protein 13 isoform 1	NP_060927	54458
PET117	255	chr20:18118513-18118993	480	25	3	2.878	3.439	5.6101	chr20	18118498	18123812	+	NM_001164811	cytochrome c oxidase assembly factor-like	NP_001158283	100303755
LINC00339	-592	chr1:22350874-22351354	480	25	3	2.878	3.439	5.6101	chr1	22351706	22357715	+	NR_023918			29092
FLJ22763	381	chr3:108855701-108856181	480	25	3	2.878	3.439	5.6101	chr3	108855560	108868951	+	NR_033977			401081
CCDC97	1102	chr19:41816955-41817435	480	25	3	2.878	3.439	5.6101	chr19	41816093	41830788	+	NM_052848	coiled-coil domain-containing protein 97	NP_443080	90324
BARHL2	676	chr1:91181878-91182358	480	25	3	2.878	3.439	5.6101	chr1	91182794	91177578	-	NM_020063	barH-like 2 homeobox protein	NP_064447	343472
COMMD9	1053	chr11:36309588-36310305	717	89	13	2.8695	5.2421	17.2977	chr11	36310999	36293841	-	NM_001101653	COMM domain-containing protein 9 isoform 2	NP_001095123	29099
TBC1D30	-1519	chr12:65216592-65217072	480	44	6	2.8653	4.24	9.1299	chr12	65218351	65274798	+	NM_015279	TBC1 domain family member 30	NP_056094	23329
PSMD3	-1291	chr17:38135528-38136008	480	44	6	2.8653	4.24	9.1299	chr17	38137059	38154212	+	NM_002809	26S proteasome non-ATPase regulatory subunit 3	NP_002800	5709	The 26S proteasome is a multicatalytic proteinase complex with a highly ordered structure composed of 2 complexes, a 20S core and a 19S regulator. The 20S core is composed of 4 rings of 28 non-identical subunits; 2 rings are composed of 7 alpha subunits and 2 rings are composed of 7 beta subunits. The 19S regulator is composed of a base, which contains 6 ATPase subunits and 2 non-ATPase subunits,…
GPR39	-1130	chr2:133172776-133173256	480	44	6	2.8653	4.24	9.1299	chr2	133174146	133404169	+	NM_001508	G-protein coupled receptor 39	NP_001499	2863
GPR149	1291	chr3:154145973-154146453	480	44	6	2.8653	4.24	9.1299	chr3	154147504	154055460	-	NM_001038705	probable G-protein coupled receptor 149	NP_001033794	344758
CHMP4B	-796	chr20:32398073-32398553	480	44	6	2.8653	4.24	9.1299	chr20	32399109	32442173	+	NM_176812	charged multivesicular body protein 4b	NP_789782	128866	This gene encodes a member of the chromatin-modifying protein/charged multivesicular body protein (CHMP) protein family. The protein is part of the endosomal sorting complex required for transport (ESCRT) complex III (ESCRT-III), which functions in the sorting of endocytosed cell-surface receptors into multivesicular endosomes. The ESCRT machinery also functions in the final abscisson stage of cy…
CERKL	-186	chr2:182521780-182522260	480	44	6	2.8653	4.24	9.1299	chr2	182521834	182401400	-	NM_001030312	ceramide kinase-like protein isoform 3	NP_001025483	375298	This gene was initially identified as a locus (RP26) associated with an autosomal recessive form of retinitis pigmentosa (arRP) disease. This gene encodes a protein with ceramide kinase-like domains, however, the protein does not phosphorylate ceramide and its target substrate is currently unknown. This protein may be a negative regulator of apoptosis in photoreceptor cells. Mutations in this gen…
ANXA13	-588	chr8:124749995-124750475	480	44	6	2.8653	4.24	9.1299	chr8	124749647	124693033	-	NM_004306	annexin A13 isoform a	NP_004297	312	This gene encodes a member of the annexin family. Members of this calcium-dependent phospholipid-binding protein family play a role in the regulation of cellular growth and in signal transduction pathways. The specific function of this gene has not yet been determined; however, it is associated with the plasma membrane of undifferentiated, proliferating endothelial cells and differentiated villus…
GDI2	1543	chr10:5853582-5854356	774	82	12	2.8591	5.13	15.952	chr10	5855512	5807185	-	NM_001115156	rab GDP dissociation inhibitor beta isoform 2	NP_001108628	2665	GDP dissociation inhibitors are proteins that regulate the GDP-GTP exchange reaction of members of the rab family, small GTP-binding proteins of the ras superfamily, that are involved in vesicular trafficking of molecules between cellular organelles. GDIs slow the rate of dissociation of GDP from rab proteins and release GDP from membrane-bound rabs. GDI2 is ubiquitously expressed. The GDI2 gene …
ZNF193	1318	chr6:28194106-28194586	480	31	4	2.8569	3.7504	6.695	chr6	28193028	28201264	+	NM_006299	zinc finger protein 193 isoform 2	NP_006290	7746
SS18	-1178	chr18:23671549-23672029	480	31	4	2.8569	3.7504	6.695	chr18	23670611	23596216	-	NM_005637	protein SSXT isoform 2	NP_005628	6760
IGFL2	-1707	chr19:46649091-46649571	480	31	4	2.8569	3.7504	6.695	chr19	46651038	46664561	+	NM_001002915	insulin growth factor-like family member 2 isoform a	NP_001002915	147920	IGFL2 belongs to the insulin-like growth factor (IGF; see MIM 147440) family of signaling molecules that play critical roles in cellular energy metabolism and in growth and development, especially prenatal growth (Emtage et al., 2006 [PubMed 16890402]).[supplied by OMIM, Mar 2008].
CCDC102B	-166	chr18:66464910-66465390	480	50	7	2.854	4.427	10.2231	chr18	66465316	66722426	+	NM_024781	coiled-coil domain-containing protein 102B	NP_079057	79839
POLR1E	-1931	chr9:37483773-37484253	480	37	5	2.8428	4.0064	7.7849	chr9	37485944	37503693	+	NM_022490	DNA-directed RNA polymerase I subunit RPA49	NP_071935	64425
PDLIM5	1550	chr4:95374347-95374827	480	37	5	2.8428	4.0064	7.7849	chr4	95373037	95509370	+	NM_001011515	PDZ and LIM domain protein 5 isoform d	NP_001011515	10611	The protein encoded by this gene is a LIM domain protein. LIM domains are cysteine-rich double zinc fingers composed of 50 to 60 amino acids that are involved in protein-protein interactions. LIM domain-containing proteins are scaffolds for the formation of multiprotein complexes. The proteins are involved in cytoskeleton organization, cell lineage specification, organ development, and oncogenesi…
LOC441455	-325	chr9:99487537-99488017	480	37	5	2.8428	4.0064	7.7849	chr9	99488102	99489749	+	NR_026792			441455
KEL	-155	chr7:142659418-142659898	480	18	2	2.8387	3.0043	4.2736	chr7	142659503	142638200	-	NM_000420	kell blood group glycoprotein	NP_000411	3792	This gene encodes a type II transmembrane glycoprotein that is the highly polymorphic Kell blood group antigen. The Kell glycoprotein links via a single disulfide bond to the XK membrane protein that carries the Kx antigen. The encoded protein contains sequence and structural similarity to members of the neprilysin (M13) family of zinc endopeptidases. [provided by RefSeq, Jul 2008].
SZT2	1492	chr1:43856795-43857300	505	43	6	2.8328	4.2237	8.8776	chr1	43855555	43919918	+	NM_015284	protein SZT2	NP_056099	23334	The protein encoded by this gene is expressed in the brain, predominantly in the parietal and frontal cortex as well as in dorsal root ganglia. It is localized to the peroxisome, and is implicated in resistance to oxidative stress. It likely functions by increasing superoxide dismutase (SOD) activity, but itself has no direct SOD activity. Studies in mice show that this gene confers low seizure t…
SERBP1	-1515	chr1:67897290-67897986	696	43	6	2.8328	4.2237	8.8776	chr1	67896123	67873492	-	NM_015640	plasminogen activator inhibitor 1 RNA-binding protein isoform 4	NP_056455	26135
KIAA0586	523	chr14:58906681-58907161	480	43	6	2.8328	4.2237	8.8776	chr14	58906398	59003931	+	NM_001244193	talpid3 protein isoform 6	NP_001231122	9786
KCNC3	-462	chr19:50832844-50833348	504	68	10	2.8325	4.8757	13.2606	chr19	50832634	50818764	-	NM_004977	potassium voltage-gated channel subfamily C member 3	NP_004968	3748	The Shaker gene family of Drosophila encodes components of voltage-gated potassium channels and is comprised of four subfamilies. Based on sequence similarity, this gene is similar to one of these subfamilies, namely the Shaw subfamily. The protein encoded by this gene belongs to the delayed rectifier class of channel proteins and is an integral membrane protein that mediates the voltage-dependen…
LOC100422737	286	chr6:107234774-107235254	480	49	7	2.8253	4.4127	9.972	chr6	107235300	107165326	-	NR_033557			100422737
VPS11	752	chr11:118939004-118939484	480	24	3	2.8212	3.4106	5.3525	chr11	118938492	118952688	+	NM_021729	vacuolar protein sorting-associated protein 11 homolog	NP_068375	55823	Vesicle mediated protein sorting plays an important role in segregation of intracellular molecules into distinct organelles. Genetic studies in yeast have identified more than 40 vacuolar protein sorting (VPS) genes involved in vesicle transport to vacuoles. This gene encodes the human homolog of yeast class C Vps11 protein. The mammalian class C Vps proteins are predominantly associated with lat…
SPP1	-1877	chr4:88894684-88895164	480	24	3	2.8212	3.4106	5.3525	chr4	88896801	88904563	+	NM_001040060	osteopontin isoform c precursor	NP_001035149	6696
OR5L2	1773	chr11:55596227-55596707	480	24	3	2.8212	3.4106	5.3525	chr11	55594694	55595630	+	NM_001004739	olfactory receptor 5L2	NP_001004739	26338	Olfactory receptors interact with odorant molecules in the nose, to initiate a neuronal response that triggers the perception of a smell. The olfactory receptor proteins are members of a large family of G-protein-coupled receptors (GPCR) arising from single coding-exon genes. Olfactory receptors share a 7-transmembrane domain structure with many neurotransmitter and hormone receptors and are resp…
MIR4709	1838	chr14:74944829-74945309	480	24	3	2.8212	3.4106	5.3525	chr14	74946907	74946835	-	NR_039858			100616211	microRNAs (miRNAs) are short (20-24 nt) non-coding RNAs that are involved in post-transcriptional regulation of gene expression in multicellular organisms by affecting both the stability and translation of mRNAs. miRNAs are transcribed by RNA polymerase II as part of capped and polyadenylated primary transcripts (pri-miRNAs) that can be either protein-coding or non-coding. The primary transcript …
MACC1	-53	chr7:20256826-20257306	480	24	3	2.8212	3.4106	5.3525	chr7	20257013	20174278	-	NM_182762	metastasis-associated in colon cancer protein 1	NP_877439	346389	MACC1 is a key regulator of the hepatocyte growth factor (HGF; MIM 142409)-HGF receptor (HGFR, or MET; MIM 164860) pathway, which is involved in cellular growth, epithelial-mesenchymal transition, angiogenesis, cell motility, invasiveness, and metastasis. Expression of MACC1 in colon cancer (MIM 114500) specimens is an independent prognostic indicator for metastasis formation and metastasis-free …
LOC646324	1500	chr2:216706519-216706999	480	24	3	2.8212	3.4106	5.3525	chr2	216708259	216476285	-	NR_037195			646324
LOC283585	1228	chr14:87373109-87373589	480	24	3	2.8212	3.4106	5.3525	chr14	87372121	87389099	+	NR_038445			283585
IL6ST	-297	chr5:55290878-55291358	480	24	3	2.8212	3.4106	5.3525	chr5	55290821	55230924	-	NM_175767	interleukin-6 receptor subunit beta isoform 2 precursor	NP_786943	3572	The protein encoded by this gene is a signal transducer shared by many cytokines, including interleukin 6 (IL6), ciliary neurotrophic factor (CNTF), leukemia inhibitory factor (LIF), and oncostatin M (OSM). This protein functions as a part of the cytokine receptor complex. The activation of this protein is dependent upon the binding of cytokines to their receptors. vIL6, a protein related to IL6 …
GPRC5A	-353	chr12:13043362-13043842	480	24	3	2.8212	3.4106	5.3525	chr12	13043955	13066600	+	NM_003979	retinoic acid-induced protein 3	NP_003970	9052	This gene encodes a member of the type 3 G protein-coupling receptor family, characterized by the signature 7-transmembrane domain motif. The encoded protein may be involved in interaction between retinoid acid and G protein signalling pathways. Retinoic acid plays a critical role in development, cellular growth, and differentiation. This gene may play a role in embryonic development and epitheli…
FAM171A1	1896	chr10:15410922-15411402	480	24	3	2.8212	3.4106	5.3525	chr10	15413058	15253643	-	NM_001010924	protein FAM171A1 precursor	NP_001010924	221061
CST3	-1571	chr20:23619905-23620385	480	24	3	2.8212	3.4106	5.3525	chr20	23618574	23614293	-	NM_000099	cystatin-C precursor	NP_000090	1471	The cystatin superfamily encompasses proteins that contain multiple cystatin-like sequences. Some of the members are active cysteine protease inhibitors, while others have lost or perhaps never acquired this inhibitory activity. There are three inhibitory families in the superfamily, including the type 1 cystatins (stefins), type 2 cystatins and the kininogens. The type 2 cystatin proteins are a …
SRD5A2	1181	chr2:31804357-31805362	1005	55	8	2.8196	4.5797	11.0675	chr2	31806040	31749655	-	NM_000348	3-oxo-5-alpha-steroid 4-dehydrogenase 2	NP_000339	6716	This gene encodes a microsomal protein expressed at high levels in androgen-sensitive tissues such as the prostate. The encoded protein is active at acidic pH and is sensitive to the 4-azasteroid inhibitor finasteride. Deficiencies in this gene can result in male pseudohermaphroditism, specifically pseudovaginal perineoscrotal hypospadias (PPSH). [provided by RefSeq, Jul 2008]. Publication Note: …
MALT1	1512	chr18:56339831-56340427	596	55	8	2.8196	4.5797	11.0675	chr18	56338617	56417370	+	NM_173844	mucosa-associated lymphoid tissue lymphoma translocation protein 1 isoform b	NP_776216	10892	This gene has been found to be recurrently rearranged in chromosomal translocation with two other genes - baculoviral IAP repeat-containing protein 3 (also known as apoptosis inhibitor 2) and immunoglobulin heavy chain locus - in mucosa-associated lymphoid tissue lymphomas. The protein encoded by this gene may play a role in NF-kappaB activation. Two alternatively spliced transcript variants enco…
SLC25A3	1227	chr12:98988389-98988869	480	30	4	2.8109	3.7274	6.4403	chr12	98987402	98995778	+	NM_213611	phosphate carrier protein, mitochondrial isoform b precursor	NP_998776	5250	The protein encoded by this gene catalyzes the transport of phosphate into the mitochondrial matrix, either by proton cotransport or in exchange for hydroxyl ions. The protein contains three related segments arranged in tandem which are related to those found in other characterized members of the mitochondrial carrier family. Both the N-terminal and C-terminal regions of this protein protrude tow…
CA5B	1108	chrX:15757279-15757759	480	30	4	2.8109	3.7274	6.4403	chrX	15756411	15805748	+	NM_007220	carbonic anhydrase 5B, mitochondrial precursor	NP_009151	11238	Carbonic anhydrases (CAs) are a large family of zinc metalloenzymes that catalyze the reversible hydration of carbon dioxide. They participate in a variety of biological processes, including respiration, calcification, acid-base balance, bone resorption, and the formation of aqueous humor, cerebrospinal fluid, saliva, and gastric acid. They show extensive diversity in tissue distribution and in t…
ZNF655	1112	chr7:99157319-99157799	480	36	5	2.8042	3.987	7.5322	chr7	99156447	99162328	+	NM_001009958	zinc finger protein 655 isoform c	NP_001009958	79027	This gene encodes a zinc finger protein. The zinc finger proteins are involved in DNA binding and protein-protein interactions. Multiple alternatively spliced transcript variants encoding distinct isoforms have been found for this gene. [provided by RefSeq, Jul 2008].
PROL1	-665	chr4:71262693-71263173	480	36	5	2.8042	3.987	7.5322	chr4	71263598	71275914	+	NM_021225	proline-rich protein 1	NP_067048	58503	This gene encodes a member of the proline-rich protein family. The protein may provide a protective function at the eye surface. [provided by RefSeq, Jul 2008].
KLHL4	-1800	chrX:86770674-86771154	480	36	5	2.8042	3.987	7.5322	chrX	86772714	86925050	+	NM_019117	kelch-like protein 4 isoform 1	NP_061990	56062	This gene encodes a member of the kelch family of proteins, which are characterized by kelch repeat motifs and a POZ/BTB protein-binding domain. It is thought that kelch repeats are actin binding domains. However, the specific function of this protein has not been determined. Alternative splicing of this gene results in two transcript variants encoding different isoforms. [provided by RefSeq, Jul…
GORAB	956	chr1:170501978-170502458	480	36	5	2.8042	3.987	7.5322	chr1	170501262	170514929	+	NM_001146039	RAB6-interacting golgin isoform b	NP_001139511	92344	This gene encodes a member of the golgin family, a group of coiled-coil proteins localized to the Golgi. The encoded protein may function in the secretory pathway. The encoded protein, which also localizes to the cytoplasm, was identified by interactions with the N-terminal kinase-like protein, and thus it may function in mitosis. Mutations in this gene have been associated with geroderma osteody…
FSIP1	722	chr15:40074077-40074557	480	36	5	2.8042	3.987	7.5322	chr15	40075039	39892231	-	NM_152597	fibrous sheath-interacting protein 1	NP_689810	161835
DEPTOR	-1900	chr8:120883759-120884239	480	36	5	2.8042	3.987	7.5322	chr8	120885899	121063157	+	NM_022783	DEP domain-containing mTOR-interacting protein	NP_073620	64798
C10orf71	1124	chr10:50508070-50508550	480	36	5	2.8042	3.987	7.5322	chr10	50507186	50535537	+	NM_001135196	hypothetical protein LOC118461 isoform 1	NP_001128668	118461
MIR1293	1160	chr12:50626595-50627075	480	42	6	2.7995	4.2071	8.6262	chr12	50627995	50627924	-	NR_031625			100302220	microRNAs (miRNAs) are short (20-24 nt) non-coding RNAs that are involved in post-transcriptional regulation of gene expression in multicellular organisms by affecting both the stability and translation of mRNAs. miRNAs are transcribed by RNA polymerase II as part of capped and polyadenylated primary transcripts (pri-miRNAs) that can be either protein-coding or non-coding. The primary transcript …
IL9	882	chr5:135230240-135231028	788	42	6	2.7995	4.2071	8.6262	chr5	135231516	135227934	-	NM_000590	interleukin-9 precursor	NP_000581	3578	The protein encoded by this gene is a cytokine that acts as a regulator of a variety of hematopoietic cells. This cytokine stimulates cell proliferation and prevents apoptosis. It functions through the interleukin 9 receptor (IL9R), which activates different signal transducer and activator (STAT) proteins and thus connects this cytokine to various biological processes. The gene encoding this cyto…
C9orf16	-1992	chr9:130920306-130920786	480	42	6	2.7995	4.2071	8.6262	chr9	130922538	130926207	+	NM_024112	hypothetical protein LOC79095	NP_077017	79095
APOBEC2	-374	chr6:41020325-41020805	480	54	8	2.7935	4.5667	10.5693	chr6	41020939	41032630	+	NM_006789	probable C->U-editing enzyme APOBEC-2	NP_006780	10930
PBOV1	-1421	chr6:138540719-138541377	658	66	10	2.7899	4.8544	12.7646	chr6	138539627	138537126	-	NM_021635	prostate and breast cancer overexpressed 1	NP_067648	59351	This intronless gene encodes a protein of unknown function. Its expression is up-regulated in some types of cancer, including prostate, breast, and bladder cancer. [provided by RefSeq, Aug 2011].
SYNE2	368	chr14:64682663-64683416	753	72	11	2.7886	4.9793	13.8626	chr14	64682671	64693167	+	NM_182910	nesprin-2 isoform 2	NP_878914	23224	The protein encoded by this gene is a nuclear outer membrane protein that binds cytoplasmic F-actin. This binding tethers the nucleus to the cytoskeleton and aids in the maintenance of the structural integrity of the nucleus. Several transcript variants encoding different isoforms have been found for this gene. [provided by RefSeq, Mar 2009].
ECHDC1	1335	chr6:127661901-127662534	633	84	13	2.7867	5.2007	16.0593	chr6	127663552	127609856	-	NM_001139510	enoyl-CoA hydratase domain-containing protein 1 isoform 5	NP_001132982	55862
SPRR3	-696	chr1:152973165-152973888	723	47	7	2.7662	4.3831	9.2237	chr1	152974222	152976332	+	NM_001097589	small proline-rich protein 3	NP_001091058	6707
PABPC1P2	1267	chr2:147345609-147346173	564	47	7	2.7662	4.3831	9.2237	chr2	147344624	147348558	+	NR_026904			728773
TMCC3	-1627	chr12:95045711-95046191	480	41	6	2.7654	4.19	8.3759	chr12	95044324	94960899	-	NM_020698	transmembrane and coiled-coil domains protein 3	NP_065749	57458
SPG20	-1410	chr13:36945487-36945967	480	41	6	2.7654	4.19	8.3759	chr13	36944317	36875774	-	NM_001142294	spartin	NP_001135766	23111	This gene encodes a protein containing a MIT (Microtubule Interacting and Trafficking molecule) domain, and is implicated in regulating endosomal trafficking and mitochondria function. The protein localizes to mitochondria and partially co-localizes with microtubules. Stimulation with epidermal growth factor (EGF) results in protein translocation to the plasma membrane, and the protein functions …
CDH26	324	chr20:58571491-58571989	498	41	6	2.7654	4.19	8.3759	chr20	58571416	58588168	+	NM_021810	cadherin-like protein 26 isoform b	NP_068582	60437	Cadherins are a family of adhesion molecules that mediate Ca2+-dependent cell-cell adhesion in all solid tissues and modulate a wide variety of processes, including cell polarization and migration. Cadherin domains occur as repeats in the extracellular region and are thought to contribute to the sorting of heterogeneous cell types and the maintenance of orderly structures such as epithelium. This…
NPFF	-1817	chr12:53902999-53903479	480	35	5	2.7645	3.9672	7.2805	chr12	53901422	53900473	-	NM_003717	FMRFamide-related peptides preproprotein	NP_003708	8620	FMFRamide-related protein precursor plays a role in the regulation of heart rate and blood pressure and the modulation of morphine-induced antinociception. FMRFAL encodes a preproprotein which is cleaved to form two active peptides with similar function. [provided by RefSeq, Jul 2008]. Publication Note: This RefSeq record includes a subset of the publications that are available for this gene. Ple…
HIBCH	-260	chr2:191184791-191185271	480	35	5	2.7645	3.9672	7.2805	chr2	191184771	191069359	-	NM_198047	3-hydroxyisobutyryl-CoA hydrolase, mitochondrial isoform 2 precursor	NP_932164	26275	This gene encodes the enzyme responsible for hydrolysis of both HIBYL-CoA and beta-hydroxypropionyl-CoA. Mutations in this gene have been associated with 3-hyroxyisobutyryl-CoA hydrolase deficiency. Alternative splicing results in multiple transcript variants.[provided by RefSeq, May 2010].
HHATL	574	chr3:42743505-42743985	480	35	5	2.7645	3.9672	7.2805	chr3	42744319	42734154	-	NM_020707	protein-cysteine N-palmitoyltransferase HHAT-like protein	NP_065758	57467
HDC	1890	chr15:50556032-50556512	480	35	5	2.7645	3.9672	7.2805	chr15	50558162	50534145	-	NM_002112	histidine decarboxylase	NP_002103	3067	This gene encodes a member of the group II decarboxylase family and forms a homodimer that converts L-histidine to histamine in a pyridoxal phosphate dependent manner. Histamine regulates several physiologic processes, including neurotransmission, gastric acid secretion,inflamation, and smooth muscle tone.[provided by RefSeq, Aug 2010]. Publication Note: This RefSeq record includes a subset of th…
FAF1	1929	chr1:51423767-51424247	480	35	5	2.7645	3.9672	7.2805	chr1	51425936	50906934	-	NM_007051	FAS-associated factor 1	NP_008982	11124	Interaction of Fas ligand (TNFSF6) with the FAS antigen (TNFRSF6) mediates programmed cell death, also called apoptosis, in a number of organ systems. The protein encoded by this gene binds to FAS antigen and can initiate apoptosis or enhance apoptosis initiated through FAS antigen. Initiation of apoptosis by the protein encoded by this gene requires a ubiquitin-like domain but not the FAS-bindin…
STARD13	-632	chr13:33780579-33781059	480	29	4	2.7634	3.7036	6.1869	chr13	33780187	33691684	-	NM_001243474	stAR-related lipid transfer protein 13 isoform 6	NP_001230403	90627	This gene encodes a protein which contains an N-terminal sterile alpha motif (SAM) for protein-protein interactions, followed by an ATP/GTP-binding motif, a GTPase-activating protein (GAP) domain, and a C-terminal STAR-related lipid transfer (START) domain. It may be involved in regulation of cytoskeletal reorganization, cell proliferation, and cell motility, and acts as a tumor suppressor in hep…
PRNP	-1719	chr20:4664837-4665317	480	29	4	2.7634	3.7036	6.1869	chr20	4666796	4682234	+	NM_183079	major prion protein preproprotein	NP_898902	5621	The protein encoded by this gene is a membrane glycosylphosphatidylinositol-anchored glycoprotein that tends to aggregate into rod-like structures. The encoded protein contains a highly unstable region of five tandem octapeptide repeats. This gene is found on chromosome 20, approximately 20 kbp upstream of a gene which encodes a biochemically and structurally similar protein to the one encoded by…
PLGLB1	1284	chr2:87247445-87247925	480	29	4	2.7634	3.7036	6.1869	chr2	87248969	87237587	-	NM_001032392	plasminogen-related protein B precursor	NP_001027564	5343
FAM196B	-798	chr5:169408302-169408782	480	29	4	2.7634	3.7036	6.1869	chr5	169407744	169290718	-	NM_001129891	hypothetical protein LOC100131897	NP_001123363	100131897
EVI5	-124	chr1:93257845-93258325	480	29	4	2.7634	3.7036	6.1869	chr1	93257961	92974252	-	NM_005665	ecotropic viral integration site 5 protein	NP_005656	7813
VTRNA2-1	1758	chr5:135414288-135414768	480	23	3	2.7621	3.381	5.0965	chr5	135416286	135416186	-	NR_030583			100126299
RPTN	-182	chr1:152131646-152132126	480	23	3	2.7621	3.381	5.0965	chr1	152131704	152126070	-	NM_001122965	repetin	NP_001116437	126638
PDK1	797	chr2:173421335-173421815	480	23	3	2.7621	3.381	5.0965	chr2	173420778	173463862	+	NM_002610	pyruvate dehydrogenase kinase, isozyme 1 precursor	NP_002601	5163	Pyruvate dehydrogenase (PDH) is a mitochondrial multienzyme complex that catalyzes the oxidative decarboxylation of pyruvate and is one of the major enzymes responsible for the regulation of homeostasis of carbohydrate fuels in mammals. The enzymatic activity is regulated by a phosphorylation/dephosphorylation cycle. Phosphorylation of PDH by a specific pyruvate dehydrogenase kinase (PDK) results…
FIBIN	-1032	chr11:27014355-27014835	480	23	3	2.7621	3.381	5.0965	chr11	27015627	27018632	+	NM_203371	fin bud initiation factor homolog precursor	NP_976249	387758
CCL13	-152	chr17:32683078-32683558	480	23	3	2.7621	3.381	5.0965	chr17	32683470	32685629	+	NM_005408	C-C motif chemokine 13 precursor	NP_005399	6357	This gene is one of several Cys-Cys (CC) cytokine genes clustered on the q-arm of chromosome 17. Cytokines are a family of secreted proteins involved in immunoregulatory and inflammatory processes. The CC cytokines are proteins characterized by two adjacent cysteines. The cytokine encoded by this gene displays chemotactic activity for monocytes, lymphocytes, basophils and eosinophils, but not neu…
SIRPB2	1243	chr20:1470750-1471230	480	17	2	2.7603	2.9651	4.0131	chr20	1472233	1455235	-	NM_001134836	signal-regulatory protein beta-2 isoform 2	NP_001128308	284759
MIR1264	911	chrX:113887800-113888280	480	17	2	2.7603	2.9651	4.0131	chrX	113887129	113887198	+	NR_031563			100302251	microRNAs (miRNAs) are short (20-24 nt) non-coding RNAs that are involved in post-transcriptional regulation of gene expression in multicellular organisms by affecting both the stability and translation of mRNAs. miRNAs are transcribed by RNA polymerase II as part of capped and polyadenylated primary transcripts (pri-miRNAs) that can be either protein-coding or non-coding. The primary transcript …
CHST1	43	chr11:45686923-45687403	480	17	2	2.7603	2.9651	4.0131	chr11	45687206	45669238	-	NM_003654	carbohydrate sulfotransferase 1	NP_003645	8534	This locus encodes a member of the keratin sulfotransferase family of proteins. The encoded enzyme catalyzes the sulfation of the proteoglycan keratin. [provided by RefSeq, Aug 2011]. Sequence Note: The RefSeq transcript and protein were derived from transcript and genomic sequence to make the sequence consistent with the reference genome assembly. The extent of this RefSeq transcript is supporte…
PPP1R9A	-437	chr7:94538532-94539012	480	52	8	2.7398	4.5398	10.0743	chr7	94539209	94925727	+	NM_001166163	neurabin-1 isoform 5	NP_001159635	55607	This gene is imprinted, and located in a cluster of imprinted genes on chromosome 7q12. This gene is transcribed in both neuronal and multiple embryonic tissues, and it is maternally expressed mainly in embryonic skeletal muscle tissues and biallelically expressed in other embryonic tissues. The protein encoded by this gene includes a PDZ domain and a sterile alpha motif (SAM). It is a regulatory…
CREM	487	chr10:35426956-35427436	480	52	8	2.7398	4.5398	10.0743	chr10	35426709	35501886	+	NM_183012	cAMP-responsive element modulator isoform t	NP_898830	1390	This gene encodes a bZIP transcription factor that binds to the cAMP responsive element found in many viral and cellular promoters. It is an important component of cAMP-mediated signal transduction during the spermatogenetic cycle, as well as other complex processes. Alternative promoter and translation initiation site usage allows this gene to exert spatial and temporal specificity to cAMP respo…
C21orf56	-1160	chr21:47605293-47605773	480	46	7	2.7357	4.3678	8.9761	chr21	47604373	47581061	-	NM_032261	hypothetical protein LOC84221 isoform 2	NP_115637	84221
XPO4	940	chr13:21475733-21476213	480	40	6	2.7305	4.1726	7.8782	chr13	21476913	21351467	-	NM_022459	exportin-4	NP_071904	64328	XPO4 belongs to a large family of karyopherins (see MIM 602738) that mediate the transport of proteins and other cargo between the nuclear and cytoplasmic compartments (Lipowsky et al., 2000 [PubMed 10944119]).[supplied by OMIM, Mar 2009].
CCDC74A	-1037	chr2:132284214-132284694	480	40	6	2.7305	4.1726	7.8782	chr2	132285491	132291239	+	NM_138770	coiled-coil domain-containing protein 74A	NP_620125	90557
CCDC14	-1217	chr3:123681232-123681712	480	40	6	2.7305	4.1726	7.8782	chr3	123680255	123632273	-	NM_022757	coiled-coil domain-containing protein 14	NP_073594	64770
TNFAIP8L2-SCNM1	261	chr1:151129125-151129605	480	34	5	2.7237	3.9468	7.0301	chr1	151129104	151142773	+	NM_001204848	TNFAIP8L2-SCNM1 protein	NP_001191777	100534012	This locus represents naturally occurring read-through transcription between the neighboring TNFAIP8L2 (tumor necrosis factor, alpha-induced protein 8-like 2) and SCNM1 (sodium channel modifier 1) genes on chromosome 1. The read-through transcript encodes a protein that shares sequence identity with the downstream gene product but its N-terminal region is shorter due to alternate exon use, compar…
TNFAIP8L2	261	chr1:151129125-151129605	480	34	5	2.7237	3.9468	7.0301	chr1	151129104	151132225	+	NM_024575	tumor necrosis factor alpha-induced protein 8-like protein 2	NP_078851	79626
FUS	1894	chr16:31193084-31193564	480	34	5	2.7237	3.9468	7.0301	chr16	31191430	31206192	+	NM_004960	RNA-binding protein FUS isoform 1	NP_004951	2521	This gene encodes a multifunctional protein component of the heterogeneous nuclear ribonucleoprotein (hnRNP) complex. The hnRNP complex is involved in pre-mRNA splicing and the export of fully processed mRNA to the cytoplasm. This protein belongs to the FET family of RNA-binding proteins which have been implicated in cellular processes that include regulation of gene expression, maintenance of ge…
FSIP2	1895	chr2:186605009-186605489	480	34	5	2.7237	3.9468	7.0301	chr2	186603354	186698016	+	NM_173651	fibrous sheath-interacting protein 2	NP_775922	401024
CBLN2	1763	chr18:70209720-70210200	480	34	5	2.7237	3.9468	7.0301	chr18	70211723	70203914	-	NM_182511	cerebellin-2 precursor	NP_872317	147381
C6orf164	-209	chr6:88106392-88106872	480	34	5	2.7237	3.9468	7.0301	chr6	88106841	88109459	+	NR_026784			63914
C2orf67	-1481	chr2:211037292-211037772	480	34	5	2.7237	3.9468	7.0301	chr2	211036051	210885434	-	NM_152519	hypothetical protein LOC151050	NP_689732	151050
TMEM50A	-1139	chr1:25663409-25663889	480	28	4	2.7143	3.6791	5.9349	chr1	25664788	25688852	+	NM_014313	transmembrane protein 50A	NP_055128	23585	This gene is located in the RH gene locus, between the RHD and RHCE genes. The function of its protein product is unknown; however, its sequence has potential transmembrane domains suggesting that it may be an integral membrane protein. Its position between the RH genes suggests that polymorphisms in this gene may be tightly linked to RH haplotypes and may contribute to selective pressure for or …
RPN1	1888	chr3:128367591-128368071	480	28	4	2.7143	3.6791	5.9349	chr3	128369719	128338812	-	NM_002950	dolichyl-diphosphooligosaccharide--protein glycosyltransferase subunit 1 precursor	NP_002941	6184	This gene encodes a type I integral membrane protein found only in the rough endoplasmic reticulum. The encoded protein is part of an N-oligosaccharyl transferase complex that links high mannose oligosaccharides to asparagine residues found in the Asn-X-Ser/Thr consensus motif of nascent polypeptide chains. This protein forms part of the regulatory subunit of the 26S proteasome and may mediate bi…
LMO3	-33	chr12:16758697-16759177	480	28	4	2.7143	3.6791	5.9349	chr12	16758904	16701305	-	NM_001243612	LIM domain only protein 3 isoform 3	NP_001230541	55885	The protein encoded by this gene belongs to the rhombotin family of cysteine-rich LIM domain oncogenes. This gene is predominantly expressed in the brain. Related family members, LMO1 and LMO2 on chromosome 11, have been reported to be involved in chromosomal translocations in T-cell leukemia. Many alternatively spliced transcript variants have been found for this gene. [provided by RefSeq, Aug 2…
DUSP1	702	chr5:172197261-172197741	480	28	4	2.7143	3.6791	5.9349	chr5	172198203	172195092	-	NM_004417	dual specificity protein phosphatase 1	NP_004408	1843	The expression of DUSP1 gene is induced in human skin fibroblasts by oxidative/heat stress and growth factors. It specifies a protein with structural features similar to members of the non-receptor-type protein-tyrosine phosphatase family, and which has significant amino-acid sequence similarity to a Tyr/Ser-protein phosphatase encoded by the late gene H1 of vaccinia virus. The bacterially expres…
CALCOCO2	542	chr17:46908673-46909153	480	28	4	2.7143	3.6791	5.9349	chr17	46908371	46942229	+	NM_005831	calcium-binding and coiled-coil domain-containing protein 2	NP_005822	10241	The protein encoded by this gene is a subunit of nuclear domain 10 (ND10) bodies. ND10 bodies are nuclear domains appearing immunohistochemically as ten dots per nucleus. They are believed to be associated with the nuclear matrix on the basis of their resistance to nuclease digestion and salt extraction. ND10 proteins are removed from the nucleus by herpes simplex virus-1 infection and may have a…
MAGEA10-MAGEA5	-961	chrX:151307746-151308226	480	51	8	2.7122	4.526	9.828	chrX	151307025	151282526	-	NM_001204811	melanoma-associated antigen 5	NP_001191740	100533997	This locus represents naturally occurring read-through transcription between the neighboring MAGEA10 (melanoma antigen family A, 10) and MAGEA5 (melanoma antigen family A, 5) genes on chromosome X. The read-through transcript is predicted to encode the downstream gene product. [provided by RefSeq, Mar 2011]. Sequence Note: This RefSeq record was created from transcript and genomic sequence data t…
MAGEA10	-961	chrX:151307746-151308226	480	51	8	2.7122	4.526	9.828	chrX	151307025	151302906	-	NM_021048	melanoma-associated antigen 10	NP_066386	4109	This gene is a member of the MAGEA gene family. The members of this family encode proteins with 50 to 80% sequence identity to each other. The promoters and first exons of the MAGEA genes show considerable variability, suggesting that the existence of this gene family enables the same function to be expressed under different transcriptional controls. The MAGEA genes are clustered at chromosomal l…
MYH6	1209	chr14:23875983-23876571	588	68	11	2.7069	4.9384	12.6357	chr14	23877486	23851198	-	NM_002471	myosin-6	NP_002462	4624	Cardiac muscle myosin is a hexamer consisting of two heavy chain subunits, two light chain subunits, and two regulatory subunits. This gene encodes the alpha heavy chain subunit of cardiac myosin. The gene is located 4kb downstream of the gene encoding the beta heavy chain subunit of cardiac myosin. Mutations in this gene cause familial hypertrophic cardiomyopathy and atrial septal defect 3. [pro…
MMGT1	1934	chrX:135053960-135054440	480	45	7	2.7045	4.3523	8.7294	chrX	135056134	135044230	-	NM_173470	membrane magnesium transporter 1 precursor	NP_775741	93380
LARP4B	-523	chr10:931985-932465	480	45	7	2.7045	4.3523	8.7294	chr10	931702	855483	-	NM_015155	la-related protein 4B	NP_055970	23185
SLC35F4	337	chr14:58332015-58332495	480	22	3	2.7004	3.3502	4.842	chr14	58332592	58030639	-	NM_001206920	solute carrier family 35 member F4	NP_001193849	341880
SH3KBP1	1204	chrX:19904300-19904780	480	22	3	2.7004	3.3502	4.842	chrX	19905744	19552082	-	NM_031892	SH3 domain-containing kinase-binding protein 1 isoform a	NP_114098	30011	This gene encodes an adapter protein that contains three N-terminal Src homology domains, a proline rich region and a C-terminal coiled-coil domain. The encoded protein facilitates protein-protein interactions and has been implicated in numerous cellular processes including apoptosis, cytoskeletal rearrangement, cell adhesion and in the regulation of clathrin-dependent endocytosis. Alternate spli…
RBM27	-355	chr5:145582567-145583047	480	22	3	2.7004	3.3502	4.842	chr5	145583162	145668784	+	NM_018989	RNA-binding protein 27	NP_061862	54439
MIR4484	-1874	chr10:127506194-127506674	480	22	3	2.7004	3.3502	4.842	chr10	127508308	127508391	+	NR_039704			100616327	microRNAs (miRNAs) are short (20-24 nt) non-coding RNAs that are involved in post-transcriptional regulation of gene expression in multicellular organisms by affecting both the stability and translation of mRNAs. miRNAs are transcribed by RNA polymerase II as part of capped and polyadenylated primary transcripts (pri-miRNAs) that can be either protein-coding or non-coding. The primary transcript …
KLRC3	1770	chr12:10571184-10571664	480	22	3	2.7004	3.3502	4.842	chr12	10573194	10568182	-	NM_007333	NKG2-E type II integral membrane protein isoform H	NP_031359	3823	Natural killer (NK) cells are lymphocytes that can mediate lysis of certain tumor cells and virus-infected cells without previous activation. They can also regulate specific humoral and cell-mediated immunity. NK cells preferentially express several calcium-dependent (C-type) lectins, which have been implicated in the regulation of NK cell function. KLRC3 is a member of the NKG2 group which are e…
IGF1	393	chr12:102871796-102872276	480	22	3	2.7004	3.3502	4.842	chr12	102872429	102789644	-	NM_001111284	insulin-like growth factor 1 isoform 2 preproprotein	NP_001104754	3479	The protein encoded by this gene is similar to insulin in function and structure and is a member of a family of proteins involved in mediating growth and development. The encoded protein is processed from a precursor, bound by a specific receptor, and secreted. Defects in this gene are a cause of insulin-like growth factor I deficiency. Several transcript variants encoding different isoforms have…
SLC22A23	403	chr6:3444575-3445055	480	39	6	2.6947	4.1547	7.631	chr6	3445218	3269206	-	NM_021945	solute carrier family 22 member 23 isoform b	NP_068764	63027	SLC22A23 belongs to a large family of transmembrane proteins that function as uniporters, symporters, and antiporters to transport organic ions across cell membranes (Jacobsson et al., 2007 [PubMed 17714910]).[supplied by OMIM, Mar 2008].
GAL3ST1	-1031	chr22:30961667-30962147	480	39	6	2.6947	4.1547	7.631	chr22	30960876	30950623	-	NM_004861	galactosylceramide sulfotransferase	NP_004852	9514	Sulfonation, an important step in the metabolism of many drugs, xenobiotics, hormones, and neurotransmitters, is catalyzed by sulfotransferases. The product of this gene is galactosylceramide sulfotransferase which catalyzes the conversion between 3'-phosphoadenylylsulfate + a galactosylceramide to adenosine 3',5'-bisphosphate + galactosylceramide sulfate. Activity of this sulfotransferase is enh…
DPPA4	-811	chr3:109056990-109057470	480	39	6	2.6947	4.1547	7.631	chr3	109056419	109044987	-	NM_018189	developmental pluripotency-associated protein 4	NP_060659	55211
SNORD113-4	-168	chr14:101402419-101402899	480	50	8	2.6841	4.512	9.5827	chr14	101402827	101402901	+	NR_003232			767564
LOC100506599	-1618	chr9:138365473-138365953	480	50	8	2.6841	4.512	9.5827	chr9	138364095	138354564	-	NR_038969			100506599
IL18RAP	-1616	chr2:103033397-103033877	480	50	8	2.6841	4.512	9.5827	chr2	103035253	103069024	+	NM_003853	interleukin-18 receptor accessory protein precursor	NP_003844	8807	The protein encoded by this gene is an accessory subunit of the heterodimeric receptor for IL18. This protein enhances the IL18 binding activity of IL18R1 (IL1RRP), a ligand binding subunit of IL18 receptor. The coexpression of IL18R1 and this protein is required for the activation of NF-kappaB and MAPK8 (JNK) in response to IL18. [provided by RefSeq, Jul 2008]. Publication Note: This RefSeq reco…
ZBP1	-1072	chr20:56196464-56196944	480	33	5	2.6817	3.9258	6.5328	chr20	56195632	56187946	-	NM_001160419	Z-DNA-binding protein 1 isoform d	NP_001153891	81030	DLM1 encodes a Z-DNA binding protein. Z-DNA formation is a dynamic process, largely controlled by the amount of supercoiling.[supplied by OMIM, Jul 2002].
SPATA12	817	chr3:57095045-57095525	480	33	5	2.6817	3.9258	6.5328	chr3	57094468	57109460	+	NM_181727	spermatogenesis-associated protein 12	NP_859078	353324
RIIAD1	965	chr1:151694737-151695217	480	33	5	2.6817	3.9258	6.5328	chr1	151694012	151702082	+	NM_001144956	RIIa domain-containing protein 1	NP_001138428	284485
RFTN2	1976	chr2:198538368-198538848	480	33	5	2.6817	3.9258	6.5328	chr2	198540584	198435526	-	NM_144629	raftlin-2	NP_653230	130132
MSX2	-1668	chr5:174149666-174150146	480	33	5	2.6817	3.9258	6.5328	chr5	174151574	174157902	+	NM_002449	homeobox protein MSX-2	NP_002440	4488	This gene encodes a member of the muscle segment homeobox gene family. The encoded protein is a transcriptional repressor whose normal activity may establish a balance between survival and apoptosis of neural crest-derived cells required for proper craniofacial morphogenesis. The encoded protein may also have a role in promoting cell growth under certain conditions and may be an important target …
MACF1	794	chr1:39547642-39548122	480	33	5	2.6817	3.9258	6.5328	chr1	39547088	39952810	+	NM_012090	microtubule-actin cross-linking factor 1 isoform a	NP_036222	23499	The protein encoded by this gene belongs to the plakin family of cytoskeletal linker proteins. This protein family forms bridges between different cytoskeletal elements through specialized modular domains. The encoded protein is one of the largest size proteins identified in human cytoskeletal proteins. It has functional actin and microtubule binding domains, and it appears to stabilize actin at …
LOC389023	956	chr2:115917724-115918204	480	33	5	2.6817	3.9258	6.5328	chr2	115918920	115901624	-	NR_036580			389023
CXADRP3	164	chr18:14498301-14498781	480	33	5	2.6817	3.9258	6.5328	chr18	14498705	14477953	-	NR_024076			440224
CDC42EP1	-896	chr22:37955334-37955814	480	33	5	2.6817	3.9258	6.5328	chr22	37956470	37965410	+	NM_152243	cdc42 effector protein 1	NP_689449	11135	CDC42 is a member of the Rho GTPase family that regulates multiple cellular activities, including actin polymerization. The protein encoded by this gene is a CDC42 binding protein that mediates actin cytoskeleton reorganization at the plasma membrane. This protein is secreted and is primarily found in bone marrow. [provided by RefSeq, Jul 2008].
CDYL	1602	chr6:4837420-4838447	1027	78	13	2.6806	5.1477	14.348	chr6	4836331	4955778	+	NM_001143970	chromodomain Y-like protein isoform d	NP_001137442	9425	Chromodomain Y is a primate-specific Y-chromosomal gene family expressed exclusively in the testis and implicated in infertility. Although the Y-linked genes are testis-specific, this autosomal gene is ubiquitously expressed. The Y-linked genes arose by retrotransposition of an mRNA from this gene, followed by amplification of the retroposed gene. Proteins encoded by this gene superfamily possess…
C10orf28	-338	chr10:99893752-99894333	581	78	13	2.6806	5.1477	14.348	chr10	99894380	100004654	+	NM_014472	growth inhibition and differentiation-related protein 88	NP_055287	27291
KDM5A	-798	chr12:499178-499658	480	61	10	2.6775	4.7982	11.2931	chr12	498620	389222	-	NM_001042603	lysine-specific demethylase 5A	NP_001036068	5927	The protein encoded by this gene is a ubiquitously expressed nuclear protein. It binds directly, with several other proteins, to retinoblastoma protein which regulates cell proliferation. This protein also interacts with rhombotin-2 which functions distinctly in erythropoiesis and in T-cell leukemogenesis. Rhombotin-2 is thought to either directly affect the activity of the encoded protein or may…
DHX29	1400	chr5:54601859-54602384	525	61	10	2.6775	4.7982	11.2931	chr5	54603521	54552072	-	NM_019030	ATP-dependent RNA helicase DHX29	NP_061903	54505
FMR1NB	-1016	chrX:147061535-147062130	595	72	12	2.6731	5.037	13.2488	chrX	147062848	147108187	+	NM_152578	fragile X mental retardation 1 neighbor protein	NP_689791	158521
PHACTR1	-492	chr6:12716304-12716784	480	44	7	2.6727	4.3363	8.4837	chr6	12717036	13288075	+	NM_030948	phosphatase and actin regulator 1	NP_112210	221692
KIAA1199	-1233	chr15:81070197-81070760	563	44	7	2.6727	4.3363	8.4837	chr15	81071711	81243999	+	NM_018689	KIAA1199 precursor	NP_061159	57214
ZNF167	348	chr3:44596820-44597300	480	27	4	2.6634	3.6536	5.6843	chr3	44596712	44613650	+	NM_018651	zinc finger protein 167 isoform 1	NP_061121	55888
TMEM25	389	chr11:118401951-118402431	480	27	4	2.6634	3.6536	5.6843	chr11	118401802	118406550	+	NM_001144036	transmembrane protein 25 isoform 3	NP_001137508	84866
TAB3	948	chrX:30906323-30906803	480	27	4	2.6634	3.6536	5.6843	chrX	30907511	30845558	-	NM_152787	TGF-beta-activated kinase 1 and MAP3K7-binding protein 3	NP_690000	257397	The product of this gene functions in the NF-kappaB signal transduction pathway. The encoded protein, and the similar and functionally redundant protein MAP3K7IP2/TAB2, forms a ternary complex with the protein kinase MAP3K7/TAK1 and either TRAF2 or TRAF6 in response to stimulation with the pro-inflammatory cytokines TNF or IL-1. Subsequent MAP3K7/TAK1 kinase activity triggers a signaling cascade …
RPL7A	156	chr9:136214984-136215464	480	27	4	2.6634	3.6536	5.6843	chr9	136215068	136218280	+	NM_000972	60S ribosomal protein L7a	NP_000963	6130	Cytoplasmic ribosomes, organelles that catalyze protein synthesis, consist of a small 40S subunit and a large 60S subunit. Together these subunits are composed of 4 RNA species and approximately 80 structurally distinct proteins. This gene encodes a ribosomal protein that is a component of the 60S subunit. The protein belongs to the L7AE family of ribosomal proteins. It can interact with a subcla…
RGS9	-599	chr17:63132616-63133096	480	27	4	2.6634	3.6536	5.6843	chr17	63133455	63206780	+	NM_001165933	regulator of G-protein signaling 9 isoform 3	NP_001159405	8787	This gene encodes a member of the RGS family of GTPase activating proteins that function in various signaling pathways by accelerating the deactivation of G proteins. This protein is anchored to photoreceptor membranes in retinal cells and deactivates G proteins in the rod and cone phototransduction cascades. Mutations in this gene result in bradyopsia. Multiple transcript variants encoding diffe…
PURG	1222	chr8:30888855-30889335	480	27	4	2.6634	3.6536	5.6843	chr8	30890317	30888356	-	NM_013357	purine-rich element-binding protein gamma isoform A	NP_037489	29942	The exact function of this gene is not known, however, its encoded product is highly similar to purine-rich element binding protein A. The latter is a DNA-binding protein which binds preferentially to the single strand of the purine-rich element termed PUR, and has been implicated in the control of both DNA replication and transcription. This gene lies in close proximity to the Werner syndrome ge…
POLQ	1690	chr3:121262923-121263403	480	27	4	2.6634	3.6536	5.6843	chr3	121264853	121150272	-	NM_199420	DNA polymerase theta	NP_955452	10721
MCC	1465	chr5:112628907-112629387	480	27	4	2.6634	3.6536	5.6843	chr5	112630612	112357795	-	NM_002387	colorectal mutant cancer protein isoform 2	NP_002378	4163	This gene is a candidate colorectal tumor suppressor gene that is thought to negatively regulate cell cycle progression. The orthologous gene in the mouse expresses a phosphoprotein associated with the plasma membrane and membrane organelles, and overexpression of the mouse protein inhibits entry into S phase. Multiple transcript variants encoding different isoforms have been found for this gene.…
GPR139	-1832	chr16:20086692-20087172	480	27	4	2.6634	3.6536	5.6843	chr16	20085100	20043042	-	NM_001002911	probable G-protein coupled receptor 139	NP_001002911	124274
DNAAF1	1456	chr16:84180080-84180560	480	27	4	2.6634	3.6536	5.6843	chr16	84178864	84211524	+	NM_178452	dynein assembly factor 1, axonemal	NP_848547	123872	The protein encoded by this gene is cilium-specific and is required for the stability of the ciliary architecture. It is involved in the regulation of microtubule-based cilia and actin-based brush border microvilli. Mutations in this gene are associated with primary ciliary dyskinesia-13.[provided by RefSeq, May 2010].
CNKSR1	1888	chr1:26505629-26506109	480	27	4	2.6634	3.6536	5.6843	chr1	26503981	26516375	+	NR_023345			10256	This gene is a necessary element in receptor tyrosine kinase pathways, possibly as a tyrosine phosphorylation target. It is involved in regulation of RAF in the MAPK pathway and may also play a role in a MAPK-independent pathway. [provided by RefSeq, Jul 2008].
CLCA2	31	chr1:86889559-86890039	480	27	4	2.6634	3.6536	5.6843	chr1	86889768	86922240	+	NM_006536	calcium-activated chloride channel regulator 2 precursor	NP_006527	9635	The protein encoded by this gene belongs to the calcium sensitive chloride conductance protein family. To date, all members of this gene family map to the same site on chromosome 1p31-p22 and share high degrees of homology in size, sequence and predicted structure, but differ significantly in their tissue distributions. Since this protein is expressed predominantly in trachea and lung, it is sugg…
CIB3	210	chr19:16283836-16284316	480	27	4	2.6634	3.6536	5.6843	chr19	16284286	16272178	-	NM_054113	calcium and integrin-binding family member 3	NP_473454	117286	This gene product shares a high degree of sequence similarity with DNA-dependent protein kinase catalytic subunit-interacting protein 2 in human and mouse, and like them may bind the catalytic subunit of DNA-dependent protein kinases. The exact function of this gene is not known. [provided by RefSeq, Jul 2008].
ATP11C	1408	chrX:138912799-138913279	480	27	4	2.6634	3.6536	5.6843	chrX	138914447	138808504	-	NM_173694	probable phospholipid-transporting ATPase IG	NP_775965	286410
TMEM212	-1931	chr3:171558967-171559447	480	38	6	2.658	4.1364	7.3849	chr3	171561138	171577108	+	NM_001164436	transmembrane protein 212	NP_001157908	389177
SLC9A8	-364	chr20:48428645-48429125	480	38	6	2.658	4.1364	7.3849	chr20	48429249	48508772	+	NM_015266	sodium/hydrogen exchanger 8	NP_056081	23315	Sodium-hydrogen exchangers (NHEs), such as SLC9A8, are integral transmembrane proteins that exchange extracellular Na+ for intracellular H+. NHEs have multiple functions, including intracellular pH homeostasis, cell volume regulation, and electroneutral NaCl absorption in epithelia (Xu et al., 2008 [PubMed 18209477]).[supplied by OMIM, Apr 2009]. Publication Note: This RefSeq record includes a su…
LOC284440	465	chr19:19886517-19886997	480	38	6	2.658	4.1364	7.3849	chr19	19887222	19867180	-	NR_026956			284440
GOLGA8A	-1095	chr15:34682856-34683336	480	38	6	2.658	4.1364	7.3849	chr15	34682001	34671269	-	NM_181077	Golgin subfamily A member 8A	NP_851422	23015	The Golgi apparatus, which participates in glycosylation and transport of proteins and lipids in the secretory pathway, consists of a series of stacked, flattened membrane sacs referred to as cisternae. Interactions between the Golgi and microtubules are thought to be important for the reorganization of the Golgi after it fragments during mitosis. The golgins constitute a family of proteins which…
CPS1-IT1	-1181	chr2:211480873-211481353	480	38	6	2.658	4.1364	7.3849	chr2	211482294	211484599	+	NR_002763			29034	This gene does not encode a protein, and it is located within an intron of the gene encoding carbamoyl-phosphate synthetase 1. [provided by RefSeq, Jul 2008]. Sequence Note: The RefSeq transcript was derived from genomic sequence to make the sequence consistent with the reference genome assembly. The genomic coordinates used for the transcript record were based on alignments.
COMMD5	-98	chr8:146078729-146079332	603	38	6	2.658	4.1364	7.3849	chr8	146078932	146075550	-	NM_001081003	COMM domain-containing protein 5	NP_001074472	28991
CD86	-995	chr3:121795460-121795940	480	38	6	2.658	4.1364	7.3849	chr3	121796695	121839988	+	NM_176892	T-lymphocyte activation antigen CD86 isoform 3 precursor	NP_795711	942	This gene encodes a type I membrane protein that is a member of the immunoglobulin superfamily. This protein is expressed by antigen-presenting cells, and it is the ligand for two proteins at the cell surface of T cells, CD28 antigen and cytotoxic T-lymphocyte-associated protein 4. Binding of this protein with CD28 antigen is a costimulatory signal for activation of the T-cell. Binding of this pr…
C2orf84	1436	chr2:24399167-24399647	480	38	6	2.658	4.1364	7.3849	chr2	24397971	24414567	+	NM_001040710	hypothetical protein LOC653140	NP_001035800	653140
SMARCA1	-1854	chrX:128658912-128659717	805	49	8	2.6554	4.4976	9.3382	chrX	128657460	128580477	-	NM_139035	probable global transcription activator SNF2L1 isoform b	NP_620604	6594	This gene encodes a member of the SWI/SNF family of proteins. Members of this family have helicase and ATPase activities and are thought to regulate transcription of certain genes by altering the chromatin structure around those genes. Alternatively spliced transcript variants encoding different isoforms have been found for this gene. [provided by RefSeq, Jul 2008].
C10orf55	891	chr10:75681404-75681884	480	49	8	2.6554	4.4976	9.3382	chr10	75682535	75669726	-	NM_001001791	hypothetical protein LOC414236	NP_001001791	414236
TMEM89	-1939	chr3:48660608-48661649	1041	71	12	2.6531	5.027	13.0067	chr3	48659189	48658274	-	NM_001008269	transmembrane protein 89 precursor	NP_001008270	440955
TCEAL7	-939	chrX:102583934-102584414	480	43	7	2.6401	4.3201	8.2391	chrX	102585113	102587251	+	NM_152278	transcription elongation factor A protein-like 7	NP_689491	56849
PRKAG3	1123	chr2:219695149-219695629	480	43	7	2.6401	4.3201	8.2391	chr2	219696512	219687105	-	NM_017431	5'-AMP-activated protein kinase subunit gamma-3	NP_059127	53632	The protein encoded by this gene is a regulatory subunit of the AMP-activated protein kinase (AMPK). AMPK is a heterotrimer consisting of an alpha catalytic subunit, and non-catalytic beta and gamma subunits. AMPK is an important energy-sensing enzyme that monitors cellular energy status. In response to cellular metabolic stresses, AMPK is activated, and thus phosphorylates and inactivates acetyl…
PATE3	-745	chr11:125657020-125657500	480	43	7	2.6401	4.3201	8.2391	chr11	125658005	125661495	+	NM_001129883	prostate and testis expressed protein 3	NP_001123355	100169851
RDH11	-1310	chr14:68163580-68164060	480	32	5	2.6384	3.9042	6.2861	chr14	68162510	68143518	-	NM_016026	retinol dehydrogenase 11	NP_057110	51109	RHD11, a member of the short-chain dehydrogenase/reductase (SDR) superfamily of oxidoreductases, is expressed at high levels in prostate epithelium, and its expression is regulated by androgens.[supplied by OMIM, Apr 2004]. Publication Note: This RefSeq record includes a subset of the publications that are available for this gene. Please see the Gene record to access additional publications.
PRPSAP2	861	chr17:18769402-18769882	480	32	5	2.6384	3.9042	6.2861	chr17	18768781	18834599	+	NM_001243940	phosphoribosyl pyrophosphate synthase-associated protein 2 isoform 3	NP_001230869	5636	This gene encodes a protein that associates with the enzyme phosphoribosylpyrophosphate synthetase (PRS). PRS catalyzes the formation of phosphoribosylpyrophosphate which is a substrate for synthesis of purine and pyrimidine nucleotides, histidine, tryptophan and NAD. PRS exists as a complex with two catalytic subunits and two associated subunits. This gene encodes a non-catalytic associated subu…
MIR1468	-1433	chrX:63007160-63007640	480	32	5	2.6384	3.9042	6.2861	chrX	63005967	63005881	-	NR_031567			100302115	microRNAs (miRNAs) are short (20-24 nt) non-coding RNAs that are involved in post-transcriptional regulation of gene expression in multicellular organisms by affecting both the stability and translation of mRNAs. miRNAs are transcribed by RNA polymerase II as part of capped and polyadenylated primary transcripts (pri-miRNAs) that can be either protein-coding or non-coding. The primary transcript …
KALRN	-494	chr3:124302771-124303251	480	32	5	2.6384	3.9042	6.2861	chr3	124303505	124440036	+	NM_007064	kalirin isoform 3	NP_008995	8997	Huntington's disease (HD), a neurodegenerative disorder characterized by loss of striatal neurons, is caused by an expansion of a polyglutamine tract in the HD protein huntingtin. This gene encodes a protein that interacts with the huntingtin-associated protein 1, which is a huntingtin binding protein that may function in vesicle trafficking. Alternatively spliced transcript variants encoding dif…
FLJ22184	348	chr19:7938738-7939218	480	32	5	2.6384	3.9042	6.2861	chr19	7939326	7933604	-	NM_001190467	hypothetical protein LOC80164	NP_001177396	80164
EXTL2	1562	chr1:101358616-101359096	480	32	5	2.6384	3.9042	6.2861	chr1	101360418	101337940	-	NM_001439	exostosin-like 2	NP_001430	2135
ENOX2	-1800	chrX:130038768-130039248	480	32	5	2.6384	3.9042	6.2861	chrX	130037208	129757356	-	NM_006375	ecto-NOX disulfide-thiol exchanger 2 isoform a	NP_006366	10495	The protein encoded by this gene is a growth-related cell surface protein. It was identifed because it reacts with the monoclonal antibody KI in cells, such as the ovarian carcinoma line OVCAR-3, also expressing the CAKI surface glycoprotein. The encoded protein has two enzymatic activities: catalysis of hydroquinone or NADH oxidation, and protein disulfide interchange. The two activities alterna…
CYB5R3	382	chr22:43044783-43045263	480	32	5	2.6384	3.9042	6.2861	chr22	43045405	43013845	-	NM_000398	NADH-cytochrome b5 reductase 3 isoform 1	NP_000389	1727	This gene encodes cytochrome b5 reductase, which includes a membrane-bound form in somatic cells (anchored in the endoplasmic reticulum, mitochondrial and other membranes) and a soluble form in erythrocytes. The membrane-bound form exists mainly on the cytoplasmic side of the endoplasmic reticulum and functions in desaturation and elongation of fatty acids, in cholesterol biosynthesis, and in dru…
ZBTB8A	-527	chr1:33004004-33004484	480	21	3	2.636	3.318	4.5893	chr1	33004771	33071542	+	NM_001040441	zinc finger and BTB domain-containing protein 8A	NP_001035531	653121
SNTG1	834	chr8:50825190-50825670	480	21	3	2.636	3.318	4.5893	chr8	50824596	51705427	+	NM_018967	gamma-1-syntrophin	NP_061840	54212	The protein encoded by this gene is a member of the syntrophin family. Syntrophins are cytoplasmic peripheral membrane proteins that typically contain 2 pleckstrin homology (PH) domains, a PDZ domain that bisects the first PH domain, and a C-terminal domain that mediates dystrophin binding. This gene is specifically expressed in the brain. Transcript variants for this gene have been described, bu…
OBFC2B	496	chr12:56618380-56618860	480	21	3	2.636	3.318	4.5893	chr12	56618124	56623638	+	NM_024068	SOSS complex subunit B1	NP_076973	79035	Single-stranded DNA (ssDNA)-binding proteins, such as OBFC2B, are ubiquitous and essential for a variety of DNA metabolic processes, including replication, recombination, and detection and repair of damage (Richard et al., 2008 [PubMed 18449195]).[supplied by OMIM, Jun 2008].
CLEC1B	1962	chr12:10149697-10150177	480	21	3	2.636	3.318	4.5893	chr12	10151899	10145661	-	NM_001099431	C-type lectin domain family 1 member B isoform b	NP_001092901	51266	Natural killer (NK) cells express multiple calcium-dependent (C-type) lectin-like receptors, such as CD94 (KLRD1; MIM 602894) and NKG2D (KLRC4; MIM 602893), that interact with major histocompatibility complex class I molecules and either inhibit or activate cytotoxicity and cytokine secretion. CLEC2 is a C-type lectin-like receptor expressed in myeloid cells and NK cells (Colonna et al., 2000 [Pu…
USPL1	1730	chr13:31193319-31193799	480	59	10	2.63	4.7744	10.8086	chr13	31191829	31233686	+	NM_005800	ubiquitin-specific peptidase-like protein 1	NP_005791	10208
SLC25A18	1908	chr22:18044850-18045330	480	48	8	2.6261	4.483	9.0947	chr22	18043182	18073647	+	NM_031481	mitochondrial glutamate carrier 2	NP_113669	83733
FAM199X	-1666	chrX:103409118-103409861	743	48	8	2.6261	4.483	9.0947	chrX	103411155	103440582	+	NM_207318	hypothetical protein LOC139231	NP_997201	139231
ZNF225	679	chr19:44617986-44618466	480	37	6	2.6204	4.1176	7.1399	chr19	44617547	44637255	+	NM_013362	zinc finger protein 225	NP_037494	7768
SNORD113-9	1270	chr14:101413015-101413495	480	37	6	2.6204	4.1176	7.1399	chr14	101411985	101412056	+	NR_003237			767569
SNCA	-906	chr4:90760113-90760593	480	37	6	2.6204	4.1176	7.1399	chr4	90759447	90645249	-	NM_001146055	alpha-synuclein isoform NACP140	NP_001139527	6622	Alpha-synuclein is a member of the synuclein family, which also includes beta- and gamma-synuclein. Synucleins are abundantly expressed in the brain and alpha- and beta-synuclein inhibit phospholipase D2 selectively. SNCA may serve to integrate presynaptic signaling and membrane trafficking. Defects in SNCA have been implicated in the pathogenesis of Parkinson disease. SNCA peptides are a major c…
S100G	511	chrX:16668551-16669031	480	37	6	2.6204	4.1176	7.1399	chrX	16668280	16672791	+	NM_004057	protein S100-G	NP_004048	795	This gene encodes calbindin D9K, a vitamin D-dependent calcium-binding protein. This cytosolic protein belongs to a family of calcium-binding proteins that includes calmodulin, parvalbumin, troponin C, and S100 protein. In the intestine, the protein is vitamin D-dependent and its expression correlates with calcium transport activity. The protein may increase Ca2+ absorption by buffering Ca2+ in t…
NCK2	-1994	chr2:106359285-106359765	480	37	6	2.6204	4.1176	7.1399	chr2	106361519	106510730	+	NM_001004722	cytoplasmic protein NCK2 isoform B	NP_001004722	8440	This gene encodes a member of the NCK family of adaptor proteins. The protein contains three SH3 domains and one SH2 domain. The protein has no known catalytic function but has been shown to bind and recruit various proteins involved in the regulation of receptor protein tyrosine kinases. It is through these regulatory activities that this protein is believed to be involved in cytoskeletal reorga…
GPR31	-1713	chr6:167572792-167573272	480	37	6	2.6204	4.1176	7.1399	chr6	167571319	167570359	-	NM_005299	probable G-protein coupled receptor 31	NP_005290	2853
SOAT1	-919	chr1:179261792-179262403	611	69	12	2.6123	5.0066	12.2847	chr1	179263016	179324453	+	NM_003101	sterol O-acyltransferase 1	NP_003092	6646	Acyl-coenzyme A:cholesterol acyltransferase (ACACT; EC 2.3.1.26) is an intracellular protein located in the endoplasmic reticulum that forms cholesterol esters from cholesterol. Accumulation of cholesterol esters as cytoplasmic lipid droplets within macrophages and smooth muscle cells is a characteristic feature of the early stages of atherosclerotic plaques (Cadigan et al., 1988 [PubMed 3335499]…
ZNF383	-1047	chr19:37716078-37716558	480	26	4	2.6107	3.6273	5.4352	chr19	37717365	37734574	+	NM_152604	zinc finger protein 383	NP_689817	163087
SETD8	1644	chr12:123870107-123870587	480	26	4	2.6107	3.6273	5.4352	chr12	123868703	123893900	+	NM_020382	N-lysine methyltransferase SETD8	NP_065115	387893
MIR3126	1879	chr2:69332452-69332932	480	26	4	2.6107	3.6273	5.4352	chr2	69330813	69330887	+	NR_036073			100423030	microRNAs (miRNAs) are short (20-24 nt) non-coding RNAs that are involved in post-transcriptional regulation of gene expression in multicellular organisms by affecting both the stability and translation of mRNAs. miRNAs are transcribed by RNA polymerase II as part of capped and polyadenylated primary transcripts (pri-miRNAs) that can be either protein-coding or non-coding. The primary transcript …
KIF6	1817	chr6:39691124-39691604	480	26	4	2.6107	3.6273	5.4352	chr6	39693181	39302875	-	NM_145027	kinesin-like protein KIF6	NP_659464	221458
PDE4B	1101	chr1:66259716-66260196	480	42	7	2.6068	4.3034	7.9955	chr1	66258855	66840262	+	NM_002600	cAMP-specific 3',5'-cyclic phosphodiesterase 4B isoform 1	NP_002591	5142	This gene is a member of the type IV, cyclic AMP (cAMP)-specific, cyclic nucleotide phosphodiesterase (PDE) family. Cyclic nucleotides are important second messengers that regulate and mediate a number of cellular responses to extracellular signals, such as hormones, light, and neurotransmitters. The cyclic nucleotide phosphodiesterases (PDEs) regulate the cellular concentrations of cyclic nucleo…
WDR96	-1305	chr10:105993059-105993791	732	58	10	2.6057	4.7623	10.5676	chr10	105992120	105889645	-	NM_025145	WD repeat-containing protein 96	NP_079421	80217
RPS15	-1008	chr19:1437114-1437594	480	58	10	2.6057	4.7623	10.5676	chr19	1438362	1440492	+	NM_001018	40S ribosomal protein S15	NP_001009	6209	Ribosomes, the organelles that catalyze protein synthesis, consist of a small 40S subunit and a large 60S subunit. Together these subunits are composed of 4 RNA species and approximately 80 structurally distinct proteins. This gene encodes a ribosomal protein that is a component of the 40S subunit. The protein belongs to the S19P family of ribosomal proteins. It is located in the cytoplasm. This …
LOC100652770	-1754	chr18:29138233-29139024	791	74	13	2.6053	5.11	13.1437	chr18	29136874	29122108	-	NR_045216			100652770
LOX	-1893	chr5:121415708-121416188	480	47	8	2.5963	4.4681	8.6106	chr5	121414055	121398889	-	NM_002317	protein-lysine 6-oxidase isoform 1 preproprotein	NP_002308	4015	The protein encoded by this gene is an extracellular copper enzyme that initiates the crosslinking of collagens and elastin. The enzyme catalyzes oxidative deamination of the epsilon-amino group in certain lysine and hydroxylysine residues of collagens and lysine residues of elastin. In addition to crosslinking extracellular matrix proteins, the encoded protein may have a role in tumor suppressio…
CLDN18	1542	chr3:137718959-137719439	480	47	8	2.5963	4.4681	8.6106	chr3	137717657	137752494	+	NM_001002026	claudin-18 isoform 2	NP_001002026	51208	This gene encodes a member of the claudin family. Claudins are integral membrane proteins and components of tight junction strands. Tight junction strands serve as a physical barrier to prevent solutes and water from passing freely through the paracellular space between epithelial or endothelial cell sheets, and also play critical roles in maintaining cell polarity and signal transductions. This …
SNHG3	1015	chr1:28833229-28833709	480	31	5	2.5938	3.8819	6.0409	chr1	28832454	28837404	+	NR_002909			8420
RCC1	1015	chr1:28833229-28833709	480	31	5	2.5938	3.8819	6.0409	chr1	28832454	28865708	+	NM_001048199	regulator of chromosome condensation isoform c	NP_001041664	1104
PIN1	-1187	chr19:9944455-9944935	480	31	5	2.5938	3.8819	6.0409	chr19	9945882	9960365	+	NM_006221	peptidyl-prolyl cis-trans isomerase NIMA-interacting 1	NP_006212	5300	Peptidyl-prolyl cis/trans isomerases (PPIases) catalyze the cis/trans isomerization of peptidyl-prolyl peptide bonds. This gene encodes one of the PPIases, which specifically binds to phosphorylated ser/thr-pro motifs to catalytically regulate the post-phosphorylation conformation of its substrates. The conformational regulation catalyzed by this PPIase has a profound impact on key proteins invol…
OR2A12	243	chr7:143792203-143792683	480	31	5	2.5938	3.8819	6.0409	chr7	143792200	143793133	+	NM_001004135	olfactory receptor 2A12	NP_001004135	346525	Olfactory receptors interact with odorant molecules in the nose, to initiate a neuronal response that triggers the perception of a smell. The olfactory receptor proteins are members of a large family of G-protein-coupled receptors (GPCR) arising from single coding-exon genes. Olfactory receptors share a 7-transmembrane domain structure with many neurotransmitter and hormone receptors and are resp…
IL20	-1954	chr1:207036959-207037439	480	31	5	2.5938	3.8819	6.0409	chr1	207039153	207042568	+	NM_018724	interleukin-20 precursor	NP_061194	50604	The protein encoded by this gene is a cytokine structurally related to interleukin 10 (IL10). This cytokine has been shown to transduce its signal through signal transducer and activator of transcription 3 (STAT3) in keratinocytes. A specific receptor for this cytokine is found to be expressed in skin and upregulated dramatically in psoriatic skin, suggesting a role for this protein in epidermal …
EID2	1704	chr19:40028894-40029374	480	31	5	2.5938	3.8819	6.0409	chr19	40030838	40029446	-	NM_153232	EP300-interacting inhibitor of differentiation 2	NP_694964	163126
ZPLD1	-1146	chr3:102152472-102152952	480	36	6	2.5818	4.0982	6.8963	chr3	102153858	102198685	+	NM_175056	zona pellucida-like domain-containing protein 1	NP_778226	131368
SLFN5	-1615	chr17:33568230-33568710	480	36	6	2.5818	4.0982	6.8963	chr17	33570085	33594761	+	NM_144975	schlafen family member 5	NP_659412	162394
SCARNA20	920	chr17:58307846-58308326	480	36	6	2.5818	4.0982	6.8963	chr17	58309006	58308876	-	NR_002999			677681
KPRP	-1943	chr1:152728322-152728802	480	36	6	2.5818	4.0982	6.8963	chr1	152730505	152734529	+	NM_001025231	keratinocyte proline-rich protein	NP_001020402	448834
EDARADD	1158	chr1:236559633-236560113	480	36	6	2.5818	4.0982	6.8963	chr1	236558715	236648008	+	NM_080738	ectodysplasin-A receptor-associated adapter protein isoform B	NP_542776	128178	This gene was identified by its association with ectodermal dysplasia, a genetic disorder characterized by defective development of hair, teeth, and eccrine sweat glands. The protein encoded by this gene is a death domain-containing protein, and is found to interact with EDAR, a death domain receptor known to be required for the development of hair, teeth and other ectodermal derivatives. This pr…
CCRL2	863	chr3:46449671-46450151	480	36	6	2.5818	4.0982	6.8963	chr3	46449048	46451014	+	NM_001130910	C-C chemokine receptor-like 2 isoform 2	NP_001124382	9034	This gene encodes a chemokine receptor like protein, which is predicted to be a seven transmembrane protein and most closely related to CCR1. Chemokines and their receptors mediated signal transduction are critical for the recruitment of effector immune cells to the site of inflammation. This gene is expressed at high levels in primary neutrophils and primary monocytes, and is further upregulated…
ARL6	-799	chr3:97482555-97483035	480	36	6	2.5818	4.0982	6.8963	chr3	97483594	97517373	+	NM_177976	ADP-ribosylation factor-like protein 6	NP_816931	84100	The protein encoded by this gene belongs to the ARF family of GTP-binding proteins. ARF proteins are important regulators of cellular traffic and are the founding members of an expanding family of homologous proteins and genomic sequences. They depart from other small GTP-binding proteins by a unique structural device that implements front-back communication from the N-terminus to the nucleotide-…
SLC4A5	-525	chr2:74570782-74571337	555	57	10	2.5809	4.7499	10.3274	chr2	74570534	74443368	-	NM_133478	electrogenic sodium bicarbonate cotransporter 4 isoform c	NP_597812	57835	This gene encodes a member of the sodium bicarbonate cotransporter (NBC) family, part of the bicarbonate transporter superfamily. Sodium bicarbonate cotransporters are involved in intracellular pH regulation and electroneural or electrogenic sodium bicarbonate transport. This protein is thought to be an integral membrane protein. Multiple transcript variants encoding different isoforms have been …
ZNF677	-923	chr19:53758794-53759274	480	62	11	2.5752	4.8725	11.1863	chr19	53758111	53738637	-	NM_182609	zinc finger protein 677	NP_872415	342926
TECR	1797	chr19:14641727-14642624	897	62	11	2.5752	4.8725	11.1863	chr19	14640378	14676792	+	NM_138501	trans-2,3-enoyl-CoA reductase	NP_612510	9524	This gene encodes a multi-pass membrane protein that resides in the endoplasmic reticulum, and belongs to the steroid 5-alpha reductase family. The elongation of microsomal long and very long chain fatty acid consists of 4 sequential reactions. This protein catalyzes the final step, reducing trans-2,3-enoyl-CoA to saturated acyl-CoA. Alternatively spliced transcript variants have been found for t…
SH3BGR	1197	chr21:40818753-40819233	480	41	7	2.5727	4.2864	7.753	chr21	40817796	40887433	+	NM_001001713	SH3 domain-binding glutamic acid-rich protein	NP_001001713	6450
OR56A5	-476	chr11:5989960-5990440	480	41	7	2.5727	4.2864	7.753	chr11	5989724	5988782	-	NM_001146033	olfactory receptor 56A5	NP_001139505	390084	Olfactory receptors interact with odorant molecules in the nose, to initiate a neuronal response that triggers the perception of a smell. The olfactory receptor proteins are members of a large family of G-protein-coupled receptors (GPCR) arising from single coding-exon genes. Olfactory receptors share a 7-transmembrane domain structure with many neurotransmitter and hormone receptors and are resp…
LOC100630923	-1693	chr7:102002374-102002854	480	41	7	2.5727	4.2864	7.753	chr7	102004307	102067129	+	NR_038967			100630923
LOC100289561	-1693	chr7:102002374-102002854	480	41	7	2.5727	4.2864	7.753	chr7	102004307	102021080	+	NM_001242713	hypothetical protein LOC100289561	NP_001229642	100289561
COLEC12	1939	chr18:498550-499030	480	41	7	2.5727	4.2864	7.753	chr18	500729	319354	-	NM_130386	collectin-12	NP_569057	81035	This gene encodes a member of the C-lectin family, proteins that possess collagen-like sequences and carbohydrate recognition domains. This protein is a scavenger receptor, a cell surface glycoprotein that can bind to carbohydrate antigens on microorganisms facilitating their recognition and removal. In addition, these receptors can recognize oxidized phospholipids so they may also participate in…
CDC14A	-547	chr1:100817117-100817833	716	41	7	2.5727	4.2864	7.753	chr1	100818022	100950926	+	NM_033313	dual specificity protein phosphatase CDC14A isoform 3	NP_201570	8556	The protein encoded by this gene is a member of the dual specificity protein tyrosine phosphatase family. It is highly similar to Saccharomyces cerevisiae Cdc14, a protein tyrosine phosphatase involved in the exit of cell mitosis and initiation of DNA replication, suggesting a role in cell cycle control. This protein has been shown to interact with, and dephosphorylate tumor suppressor protein p5…
C6orf47	1490	chr6:31626713-31627405	692	41	7	2.5727	4.2864	7.753	chr6	31628549	31626074	-	NM_021184	G4 protein	NP_067007	57827
BEND6	1348	chr6:56820880-56821360	480	41	7	2.5727	4.2864	7.753	chr6	56819772	56892142	+	NM_152731	BEN domain-containing protein 6	NP_689944	221336
UBE3A	123	chr15:25650290-25650770	480	20	3	2.5686	3.2843	4.3385	chr15	25650653	25582395	-	NM_130838	ubiquitin-protein ligase E3A isoform 1	NP_570853	7337	This gene encodes an E3 ubiquitin-protein ligase, part of the ubiquitin protein degradation system. This imprinted gene is maternally expressed in brain and biallelically expressed in other tissues. Maternally inherited deletion of this gene causes Angelman Syndrome, characterized by severe motor and intellectual retardation, ataxia, hypotonia, epilepsy, absence of speech, and characteristic faci…
OR8U8	-593	chr11:56142266-56142746	480	20	3	2.5686	3.2843	4.3385	chr11	56143099	56508560	+	NM_001013356	olfactory receptor 8U8	NP_001013374	504189	Olfactory receptors interact with odorant molecules in the nose, to initiate a neuronal response that triggers the perception of a smell. The olfactory receptor proteins are members of a large family of G-protein-coupled receptors (GPCR) arising from single coding-exon genes. Olfactory receptors share a 7-transmembrane domain structure with many neurotransmitter and hormone receptors and are resp…
OR8U1	-593	chr11:56142266-56142746	480	20	3	2.5686	3.2843	4.3385	chr11	56143099	56144029	+	NM_001005204	olfactory receptor 8U1	NP_001005204	219417	Olfactory receptors interact with odorant molecules in the nose, to initiate a neuronal response that triggers the perception of a smell. The olfactory receptor proteins are members of a large family of G-protein-coupled receptors (GPCR) arising from single coding-exon genes. Olfactory receptors share a 7-transmembrane domain structure with many neurotransmitter and hormone receptors and are resp…
LOC286359	1442	chr9:100157291-100157771	480	20	3	2.5686	3.2843	4.3385	chr9	100158973	100153118	-	NR_026847			286359
LOC100329109	1364	chr2:206979692-206980172	480	20	3	2.5686	3.2843	4.3385	chr2	206981296	206980296	-	NR_033248			100329109
CEP19	696	chr3:196438187-196438667	480	20	3	2.5686	3.2843	4.3385	chr3	196439123	196433147	-	NM_032898	centrosomal protein of 19 kDa	NP_116287	84984
ARHGEF25	600	chr12:58005577-58006057	480	20	3	2.5686	3.2843	4.3385	chr12	58005217	58011026	+	NM_182947	rho guanine nucleotide exchange factor 25 isoform 1	NP_891992	115557	The Rho family of small GTPases act as molecular switches to control a wide range of cellular processes. Guanine nucleotide exchange factors (GEFs), like GEFT, activate Rho GTPases by accelerating GDP/GTP exchange (Souchet et al., 2002 [PubMed 11861769]).[supplied by OMIM, Mar 2008].
TREML3	-1517	chr6:41186897-41187508	611	51	9	2.5602	4.602	9.2289	chr6	41185685	41176291	-	NR_027256			340206	TREML3 is located in a gene cluster on chromosome 6 with the single Ig variable (IgV) domain activating receptors TREM1 (MIM 605085) and TREM2 (MIM 605086), but it has distinct structural and functional properties (Allcock et al., 2003 [PubMed 12645956]).[supplied by OMIM, Mar 2008]. Sequence Note: The RefSeq transcript was derived from genomic sequence to make the sequence consistent with the re…
MTF2	783	chr1:93545334-93545814	480	51	9	2.5602	4.602	9.2289	chr1	93544791	93604638	+	NM_001164393	metal-response element-binding transcription	NP_001157865	22823
UTP14C	882	chr13:52599468-52599948	480	25	4	2.5561	3.6	4.9418	chr13	52598826	52607736	+	NM_021645	U3 small nucleolar RNA-associated protein 14 homolog C	NP_067677	9724
GCLM	-827	chr1:94375599-94376079	480	25	4	2.5561	3.6	4.9418	chr1	94375012	94352589	-	NM_002061	glutamate--cysteine ligase regulatory subunit	NP_002052	2730	Glutamate-cysteine ligase, also known as gamma-glutamylcysteine synthetase, is the first rate limiting enzyme of glutathione synthesis. The enzyme consists of two subunits, a heavy catalytic subunit and a light regulatory subunit. Gamma glutamylcysteine synthetase deficiency has been implicated in some forms of hemolytic anemia. [provided by RefSeq, Jul 2008]. Publication Note: This RefSeq record…
CRISP1	-574	chr6:49845143-49845623	480	25	4	2.5561	3.6	4.9418	chr6	49844809	49801978	-	NM_001205220	cysteine-rich secretory protein 1 isoform 1 precursor	NP_001192149	167	Fertilization consists of a sequence of specific cell-cell interactions culminating in the fusion of the sperm and egg plasma membranes. Recognition, binding, and fusion occur through the interaction of complementary molecules that are localized to specific domains of the sperm and egg plasma membranes. In the sperm, the postacrosomal region or equatorial segment is involved in sperm-egg plasma m…
CLDN14	-698	chr21:37839183-37839663	480	25	4	2.5561	3.6	4.9418	chr21	37838725	37832919	-	NM_012130	claudin-14	NP_036262	23562	Tight junctions represent one mode of cell-to-cell adhesion in epithelial or endothelial cell sheets, forming continuous seals around cells and serving as a physical barrier to prevent solutes and water from passing freely through the paracellular space. These junctions are comprised of sets of continuous networking strands in the outwardly facing cytoplasmic leaflet, with complementary grooves i…
CHCHD2	460	chr7:56173487-56173967	480	25	4	2.5561	3.6	4.9418	chr7	56174187	56169265	-	NM_016139	coiled-coil-helix-coiled-coil-helix	NP_057223	51142
POM121	1706	chr7:72351401-72351881	480	61	11	2.552	4.8609	10.7094	chr7	72349935	72418838	+	NM_172020	nuclear envelope pore membrane protein POM 121	NP_742017	9883	The nuclear envelope creates distinct nuclear and cytoplasmic compartments in eukaryotic cells. It consists of two concentric membranes perforated by nuclear pores, large protein complexes that form aqueous channels to regulate the flow of macromolecules between the nucleus and the cytoplasm. These complexes are composed of at least 100 different polypeptide subunits, many of which belong to the …
PALM3	-705	chr19:14170436-14170916	480	30	5	2.5478	3.8589	5.7971	chr19	14169971	14164178	-	NM_001145028	paralemmin-3	NP_001138500	342979
NT5C1A	-1129	chr1:40138599-40139079	480	30	5	2.5478	3.8589	5.7971	chr1	40137710	40124792	-	NM_032526	cytosolic 5'-nucleotidase 1A	NP_115915	84618	Cytosolic nucleotidases, such as NT5C1A, dephosphorylate nucleoside monophosphates (Hunsucker et al., 2001 [PubMed 11133996]).[supplied by OMIM, Mar 2008].
LOC100303749	232	chr5:65240929-65241409	480	30	5	2.5478	3.8589	5.7971	chr5	65241401	65240632	-	NR_028474			100303749
FBXW4	-1265	chr10:103455768-103456248	480	30	5	2.5478	3.8589	5.7971	chr10	103454743	103370420	-	NM_022039	F-box/WD repeat-containing protein 4	NP_071322	6468	This gene is a member of the F-box/WD-40 gene family, which recruit specific target proteins through their WD-40 protein-protein binding domains for ubiquitin mediated degradation. In mouse, a highly similar protein is thought to be responsible for maintaining the apical ectodermal ridge of developing limb buds; disruption of the mouse gene results in the absence of central digits, underdeveloped…
C6orf81	305	chr6:35704923-35705403	480	30	5	2.5478	3.8589	5.7971	chr6	35704858	35716685	+	NM_145028	hypothetical protein LOC221481	NP_659465	221481
ZNF770	-1965	chr15:35282222-35282702	480	35	6	2.5421	4.0784	6.6539	chr15	35280497	35270541	-	NM_014106	zinc finger protein 770	NP_054825	54989
TXNDC15	22	chr5:134209241-134209721	480	35	6	2.5421	4.0784	6.6539	chr5	134209459	134237323	+	NM_024715	thioredoxin domain-containing protein 15 precursor	NP_078991	79770
SNORD94	-261	chr2:86362491-86362971	480	35	6	2.5421	4.0784	6.6539	chr2	86362992	86363129	+	NR_004378			692225
SMAD5-AS1	-280	chr5:135470619-135471099	480	35	6	2.5421	4.0784	6.6539	chr5	135470579	135465202	-	NR_026763			9597
OXER1	-1388	chr2:42992549-42993029	480	35	6	2.5421	4.0784	6.6539	chr2	42991401	42989638	-	NM_148962	oxoeicosanoid receptor 1	NP_683765	165140
LRRFIP1	1674	chr2:238602240-238602720	480	35	6	2.5421	4.0784	6.6539	chr2	238600806	238674558	+	NM_001137553	leucine-rich repeat flightless-interacting protein 1 isoform 5	NP_001131025	9208
KLRG1	62	chr12:9142042-9142522	480	35	6	2.5421	4.0784	6.6539	chr12	9142220	9163340	+	NM_005810	killer cell lectin-like receptor subfamily G member 1	NP_005801	10219	Natural killer (NK) cells are lymphocytes that can mediate lysis of certain tumor cells and virus-infected cells without previous activation. They can also regulate specific humoral and cell-mediated immunity. The protein encoded by this gene belongs to the killer cell lectin-like receptor (KLR) family, which is a group of transmembrane proteins preferentially expressed in NK cells. Studies in mi…
HIST1H2BF	1634	chr6:26201180-26201660	480	40	7	2.5378	4.2689	7.2715	chr6	26199786	26200216	+	NM_003522	histone H2B type 1-C/E/F/G/I	NP_003513	8343	Histones are basic nuclear proteins that are responsible for the nucleosome structure of the chromosomal fiber in eukaryotes. Two molecules of each of the four core histones (H2A, H2B, H3, and H4) form an octamer, around which approximately 146 bp of DNA is wrapped in repeating units, called nucleosomes. The linker histone, H1, interacts with linker DNA between nucleosomes and functions in the co…
DHRS7C	656	chr17:9693718-9694198	480	40	7	2.5378	4.2689	7.2715	chr17	9694614	9674750	-	NM_001220493	dehydrogenase/reductase SDR family member 7C isoform 1	NP_001207422	201140
CPLX3	-1595	chr15:75117066-75117645	579	40	7	2.5378	4.2689	7.2715	chr15	75118950	75124136	+	NM_001030005	complexin-3 precursor	NP_001025176	594855
KIAA1731	1757	chr11:93396332-93396812	480	45	8	2.5346	4.4372	8.1306	chr11	93394815	93463522	+	NM_033395	hypothetical protein LOC85459	NP_203753	85459
BTBD3	-421	chr20:11870815-11871295	480	45	8	2.5346	4.4372	8.1306	chr20	11871476	11907243	+	NM_181443	BTB/POZ domain-containing protein 3 isoform b	NP_852108	22903
RPL23AP64	854	chr11:118873209-118873689	480	65	12	2.5271	4.964	11.3322	chr11	118874303	118873670	-	NR_003040			649946
PTPN11	1954	chr12:112858229-112858749	520	65	12	2.5271	4.964	11.3322	chr12	112856535	112947717	+	NM_002834	tyrosine-protein phosphatase non-receptor type 11	NP_002825	5781	The protein encoded by this gene is a member of the protein tyrosine phosphatase (PTP) family. PTPs are known to be signaling molecules that regulate a variety of cellular processes including cell growth, differentiation, mitotic cycle, and oncogenic transformation. This PTP contains two tandem Src homology-2 domains, which function as phospho-tyrosine binding domains and mediate the interaction …
AANAT	1441	chr17:74450543-74451203	660	75	14	2.525	5.1694	12.8167	chr17	74449432	74466199	+	NM_001166579	serotonin N-acetyltransferase isoform 1	NP_001160051	15	The protein encoded by this gene belongs to the acetyltransferase superfamily. It is the penultimate enzyme in melatonin synthesis and controls the night/day rhythm in melatonin production in the vertebrate pineal gland. Melatonin is essential for the function of the circadian clock that influences activity and sleep. This enzyme is regulated by cAMP-dependent phosphorylation that promotes its in…
WDR89	-1829	chr14:64110095-64110746	651	69	13	2.5054	5.0601	11.7211	chr14	64108591	64063756	-	NM_080666	WD repeat-containing protein 89	NP_542397	112840
MIR601	913	chr9:126163705-126164233	528	64	12	2.505	4.9529	11.0961	chr9	126164882	126164803	-	NR_030332			693186	microRNAs (miRNAs) are short (20-24 nt) non-coding RNAs that are involved in post-transcriptional regulation of gene expression in multicellular organisms by affecting both the stability and translation of mRNAs. miRNAs are transcribed by RNA polymerase II as part of capped and polyadenylated primary transcripts (pri-miRNAs) that can be either protein-coding or non-coding. The primary transcript …
APLN	1728	chrX:128786943-128787467	524	59	11	2.5045	4.8372	10.2358	chrX	128788933	128779235	-	NM_017413	apelin preproprotein	NP_059109	8862	This gene encodes a peptide that functions as an endogenous ligand for the G protein coupled receptor APJ. The encoded protein is synthesized as a prepropeptide that is processed into biologically active C-terminal fragments. The peptide fragments activate different tissue specific signaling pathways that regulate diverse biological functions including fluid homeostasis, cardiovascular function a…
NUDCD1	128	chr8:110341643-110342426	783	54	10	2.504	4.7114	9.3755	chr8	110342162	110253147	-	NM_001128211	nudC domain-containing protein 1 isoform 2	NP_001121683	84955
CTRC	-1742	chr1:15762955-15763435	480	54	10	2.504	4.7114	9.3755	chr1	15764937	15773153	+	NM_007272	chymotrypsin-C preproprotein	NP_009203	11330	This gene encodes a member of the peptidase S1 family. The encoded protein is a serum calcium-decreasing factor that has chymotrypsin-like protease activity. Alternatively spliced transcript variants have been observed, but their full-length nature has not been determined. [provided by RefSeq, Jul 2008]. Publication Note: This RefSeq record includes a subset of the publications that are available…
BCL2L13	1487	chr22:18122579-18123364	785	54	10	2.504	4.7114	9.3755	chr22	18121484	18211989	+	NM_015367	bcl-2-like protein 13	NP_056182	23786
SLCO4A1	-1155	chr20:61272401-61272881	480	44	8	2.5028	4.4213	7.8923	chr20	61273796	61303647	+	NM_016354	solute carrier organic anion transporter family	NP_057438	28231
RPIA	-955	chr2:88989980-88990460	480	44	8	2.5028	4.4213	7.8923	chr2	88991175	89050452	+	NM_144563	ribose-5-phosphate isomerase	NP_653164	22934	The protein encoded by this gene is an enzyme, which catalyzes the reversible conversion between ribose-5-phosphate and ribulose-5-phosphate in the pentose-phosphate pathway. This gene is highly conserved in most organisms. The enzyme plays an essential role in the carbohydrate metabolism. Mutations in this gene cause ribose 5-phosphate isomerase deficiency. A pseudogene is found on chromosome 18…
LOC646278	-144	chr15:29034595-29035075	480	44	8	2.5028	4.4213	7.8923	chr15	29034979	29101720	+	NR_037599			646278
FRMPD2	856	chr10:49481845-49482325	480	44	8	2.5028	4.4213	7.8923	chr10	49482941	49364601	-	NM_001018071	FERM and PDZ domain-containing protein 2	NP_001018081	143162	This gene encodes a peripheral membrane protein and is located in a region of chromosome 10q that contains a segmental duplication. This copy of the gene is full-length and is in the telomeric duplicated region. Two other more centromerically proximal copies of the gene are partial and may represent pseudogenes. This full-length gene appears to function in the establishment and maintenance of cel…
DISC2	-278	chr1:231954301-231954781	480	44	8	2.5028	4.4213	7.8923	chr1	231954263	231950371	-	NR_002227			27184	DISC2 is thought to specify a noncoding RNA molecule antisense to DISC1 (MIM 605210). Both genes were found to be disrupted by a translocation in a large schizophrenia (MIM 181500) kindred.[supplied by OMIM, Jul 2002].
CEP192	-351	chr18:12990769-12991249	480	39	7	2.5021	4.251	7.0327	chr18	12991360	13125051	+	NM_032142	centrosomal protein of 192 kDa	NP_115518	55125
C11orf63	-701	chr11:122752531-122753011	480	39	7	2.5021	4.251	7.0327	chr11	122753472	122776583	+	NM_199124	hypothetical protein LOC79864 isoform 2	NP_954575	79864
TMEM217	-643	chr6:37226334-37226814	480	34	6	2.5013	4.058	6.4129	chr6	37225931	37185417	-	NM_001162900	transmembrane protein 217 isoform 2	NP_001156372	221468
SKIL	121	chr3:170077291-170077771	480	34	6	2.5013	4.058	6.4129	chr3	170077410	170110950	+	NM_001145097	ski-like protein isoform 2	NP_001138569	6498
LOC388499	-692	chr19:7945569-7946049	480	34	6	2.5013	4.058	6.4129	chr19	7945117	7943516	-	NR_033250			388499
CNGA2	-819	chrX:150902158-150902638	480	34	6	2.5013	4.058	6.4129	chrX	150903217	150914036	+	NM_005140	cyclic nucleotide-gated olfactory channel	NP_005131	1260	The protein encoded by this gene represents the alpha subunit of a cyclic nucleotide-gated olfactory channel. The encoded protein contains a carboxy-terminal leucine zipper that mediates channel formation. [provided by RefSeq, Jan 2010].
SRG7	1576	chr1:109401174-109401654	480	29	5	2.5003	3.8351	5.5548	chr1	109399838	109401146	+	NR_034168			642864
SCGB1A1	1867	chr11:62188133-62188613	480	29	5	2.5003	3.8351	5.5548	chr11	62186506	62190678	+	NM_003357	uteroglobin precursor	NP_003348	7356	This gene encodes a member of the secretoglobin family of small secreted proteins. The encoded protein has been implicated in numerous functions including anti-inflammation, inhibition of phospholipase A2 and the sequestering of hydrophobic ligands. Defects in this gene are associated with a susceptibility to asthma. [provided by RefSeq, May 2010]. Publication Note: This RefSeq record includes a …
RXFP1	-807	chr4:159441999-159442479	480	29	5	2.5003	3.8351	5.5548	chr4	159443046	159573263	+	NM_021634	relaxin receptor 1	NP_067647	59350
MYOC	-469	chr1:171622002-171622482	480	29	5	2.5003	3.8351	5.5548	chr1	171621773	171604556	-	NM_000261	myocilin precursor	NP_000252	4653	MYOC encodes the protein myocilin, which is believed to have a role in cytoskeletal function. MYOC is expressed in many occular tissues, including the trabecular meshwork, and was revealed to be the trabecular meshwork glucocorticoid-inducible response protein (TIGR). The trabecular meshwork is a specialized eye tissue essential in regulating intraocular pressure, and mutations in MYOC have been …
FAM158A	-1864	chr14:24612421-24612901	480	29	5	2.5003	3.8351	5.5548	chr14	24610797	24608173	-	NM_016049	hypothetical protein LOC51016	NP_057133	51016
FAF2	1276	chr5:175876391-175876871	480	29	5	2.5003	3.8351	5.5548	chr5	175875355	175937075	+	NM_014613	FAS-associated factor 2	NP_055428	23197	The protein encoded by this gene is highly expressed in peripheral blood of patients with atopic dermatitis (AD), compared to normal individuals. It may play a role in regulating the resistance to apoptosis that is observed in T cells and eosinophils of AD patients. [provided by RefSeq, Jul 2008].
XPO7	1567	chr8:21778506-21778986	480	24	4	2.4993	3.5716	4.6979	chr8	21777179	21864096	+	NM_015024	exportin-7	NP_055839	23039	The transport of protein and large RNAs through the nuclear pore complexes (NPC) is an energy-dependent and regulated process. The import of proteins with a nuclear localization signal (NLS) is accomplished by recognition of one or more clusters of basic amino acids by the importin-alpha/beta complex; see MIM 600685 and MIM 602738. The small GTPase RAN (MIM 601179) plays a key role in NLS-depende…
MIR92B	459	chr1:155165186-155165666	480	24	4	2.4993	3.5716	4.6979	chr1	155164967	155165063	+	NR_030281			693235	microRNAs (miRNAs) are short (20-24 nt) non-coding RNAs that are involved in post-transcriptional regulation of gene expression in multicellular organisms by affecting both the stability and translation of mRNAs. miRNAs are transcribed by RNA polymerase II as part of capped and polyadenylated primary transcripts (pri-miRNAs) that can be either protein-coding or non-coding. The primary transcript …
MAD2L1	-212	chr4:120987985-120988465	480	24	4	2.4993	3.5716	4.6979	chr4	120988013	120980578	-	NM_002358	mitotic spindle assembly checkpoint protein MAD2A	NP_002349	4085	MAD2L1 is a component of the mitotic spindle assembly checkpoint that prevents the onset of anaphase until all chromosomes are properly aligned at the metaphase plate. MAD2L1 is related to the MAD2L2 gene located on chromosome 1. A MAD2 pseudogene has been mapped to chromosome 14. [provided by RefSeq, Jul 2008]. Publication Note: This RefSeq record includes a subset of the publications that are a…
KIF13A	-421	chr6:17988035-17988515	480	24	4	2.4993	3.5716	4.6979	chr6	17987854	17950636	-	NM_001243423	kinesin-like protein KIF13A isoform e	NP_001230352	63971	This gene encodes a member of the kinesin family of microtubule-based motor proteins that function in the positioning of endosomes. This family member can direct mannose-6-phosphate receptor-containing vesicles from the trans-Golgi network to the plasma membrane, and it is necessary for the steady-state distribution of late endosomes/lysosomes. It is also required for the translocation of FYVE-CE…
BORA	1307	chr13:73303108-73303588	480	24	4	2.4993	3.5716	4.6979	chr13	73302041	73330328	+	NM_024808	protein aurora borealis	NP_079084	79866	BORA is an activator of the protein kinase Aurora A (AURKA; MIM 603072), which is required for centrosome maturation, spindle assembly, and asymmetric protein localization during mitosis (Hutterer et al., 2006 [PubMed 16890155]).[supplied by OMIM, Mar 2008].
SEL1L2	427	chr20:13970595-13971075	480	19	3	2.4979	3.249	4.0896	chr20	13971262	13830049	-	NM_025229	protein sel-1 homolog 2 precursor	NP_079505	80343
MIR4280	1718	chr5:86408813-86409293	480	19	3	2.4979	3.249	4.0896	chr5	86410771	86410695	-	NR_036243			100422887	microRNAs (miRNAs) are short (20-24 nt) non-coding RNAs that are involved in post-transcriptional regulation of gene expression in multicellular organisms by affecting both the stability and translation of mRNAs. miRNAs are transcribed by RNA polymerase II as part of capped and polyadenylated primary transcripts (pri-miRNAs) that can be either protein-coding or non-coding. The primary transcript …
LOC339524	-836	chr1:87596532-87597012	480	19	3	2.4979	3.249	4.0896	chr1	87597608	87602352	+	NR_026987			339524
NACA2	-892	chr17:59669196-59669715	519	93	18	2.4919	5.4939	15.555	chr17	59668563	59667793	-	NM_199290	nascent polypeptide-associated complex subunit alpha-2	NP_954984	342538
LOC100505876	-524	chr2:37422836-37423385	549	93	18	2.4919	5.4939	15.555	chr2	37423634	37431886	+	NR_037880			100505876
LGALS8	-472	chr1:236680629-236681453	824	63	12	2.4825	4.9417	10.8607	chr1	236681513	236716279	+	NM_201545	galectin-8 isoform a	NP_963839	3964	This gene encodes a member of the galectin family. Galectins are beta-galactoside-binding animal lectins with conserved carbohydrate recognition domains. The galectins have been implicated in many essential functions including development, differentiation, cell-cell adhesion, cell-matrix interaction, growth regulation, apoptosis, and RNA splicing. This gene is widely expressed in tumoral tissues …
EXOC6B	-1803	chr2:73054740-73055220	480	53	10	2.4774	4.6981	9.1399	chr2	73053177	72406443	-	NM_015189	exocyst complex component 6B	NP_056004	23233	In yeast and rat, Sec15 is part of a multiprotein complex that is required for targeted exocytosis.[supplied by OMIM, Apr 2004].
KRTAP13-4	-598	chr21:31801755-31802235	480	48	9	2.4741	4.559	8.5153	chr21	31802593	31803076	+	NM_181600	keratin-associated protein 13-4	NP_853631	284827
GAB3	975	chrX:153978133-153978613	480	48	9	2.4741	4.559	8.5153	chrX	153979348	153903526	-	NM_080612	GRB2-associated-binding protein 3 isoform 2	NP_542179	139716	This gene is a member of the GRB2-associated binding protein gene family. These proteins are scaffolding/docking proteins that are involved in several growth factor and cytokine signaling pathways, and they contain a pleckstrin homology domain, and bind SHP2 tyrosine phosphatase and GRB2 adapter protein. The protein encoded by this gene facilitates macrophage differentiation. Two transcript varia…
WRAP53	1671	chr17:7592981-7593694	713	82	16	2.4721	5.3235	13.6011	chr17	7591666	7606820	+	NM_018081	telomerase Cajal body protein 1	NP_060551	55135	This gene encodes an essential component of the telomerase holoenzyme complex, a ribonucleoprotein complex required for telomere synthesis. This protein is enriched in Cajal bodies, nuclear sites of RNP processing that are important for telomerase function. It interacts with dyskerin, TERT and TERC, other components of active telomerase, and with small Cajal body RNAs (scaRNAs), which are involve…
ZNF300P1	-1251	chr5:150327157-150327637	480	43	8	2.4702	4.405	7.6552	chr5	150326146	150309997	-	NR_026867			134466
LMAN2L	1132	chr2:97404441-97404921	480	43	8	2.4702	4.405	7.6552	chr2	97405813	97371666	-	NM_030805	VIP36-like protein isoform 2	NP_110432	81562
KRT31	149	chr17:39553455-39553935	480	43	8	2.4702	4.405	7.6552	chr17	39553844	39549976	-	NM_002277	keratin, type I cuticular Ha1	NP_002268	3881	The protein encoded by this gene is a member of the keratin gene family. As a type I hair keratin, it is an acidic protein which heterodimerizes with type II keratins to form hair and nails. The type I hair keratins are clustered in a region of chromosome 17q12-q21 and have the same direction of transcription. [provided by RefSeq, Jul 2008]. Publication Note: This RefSeq record includes a subset …
EDA2R	-1065	chrX:65836697-65837177	480	43	8	2.4702	4.405	7.6552	chrX	65835872	65815481	-	NM_001242310	tumor necrosis factor receptor superfamily member 27 isoform 2	NP_001229239	60401	EDA-A1 and EDA-A2 are two isoforms of ectodysplasin that are encoded by the anhidrotic ectodermal dysplasia (EDA) gene. Mutations in EDA give rise to a clinical syndrome characterized by loss of hair, sweat glands, and teeth. The protein encoded by this gene specifically binds to EDA-A2 isoform. This protein is a type III transmembrane protein of the TNFR (tumor necrosis factor receptor) superfam…
ZMAT1	807	chrX:101185992-101186472	480	38	7	2.4654	4.2327	6.7951	chrX	101187039	101137259	-	NM_001011657	zinc finger matrin-type protein 1 isoform 1	NP_001011657	84460	This gene encodes a zinc finger protein. Alternatively spliced transcript variants have been described. [provided by RefSeq, Jul 2010].
ZC4H2	779	chrX:64253605-64254085	480	38	7	2.4654	4.2327	6.7951	chrX	64254624	64135681	-	NM_001243804	zinc finger C4H2 domain-containing protein isoform 2	NP_001230733	55906	This gene encodes a member of the zinc finger domain-containing protein family. This family member has a C-terminal zinc finger domain that is characterized by four cysteine residues and two histidine residues, and it also includes a coiled-coil region. This protein has been detected as an autoantigen in hepatocellular carcinoma patients. This gene has been identified as a potential candidate for…
TUBA1C	-1888	chr12:49656736-49657216	480	38	7	2.4654	4.2327	6.7951	chr12	49658864	49667113	+	NM_032704	tubulin alpha-1C chain	NP_116093	84790
TRIM29	-468	chr11:120009091-120009571	480	38	7	2.4654	4.2327	6.7951	chr11	120008863	119981993	-	NM_012101	tripartite motif-containing protein 29	NP_036233	23650	The protein encoded by this gene belongs to the TRIM protein family. It has multiple zinc finger motifs and a leucine zipper motif. It has been proposed to form homo- or heterodimers which are involved in nucleic acid binding. Thus, it may act as a transcriptional regulatory factor involved in carcinogenesis and/or differentiation. It may also function in the suppression of radiosensitivity since…
SPAG17	245	chr1:118727363-118727843	480	38	7	2.4654	4.2327	6.7951	chr1	118727848	118496287	-	NM_206996	sperm-associated antigen 17	NP_996879	200162
PDE6C	-1267	chr10:95370837-95371317	480	38	7	2.4654	4.2327	6.7951	chr10	95372344	95425429	+	NM_006204	cone cGMP-specific 3',5'-cyclic phosphodiesterase subunit alpha'	NP_006195	5146	This gene encodes the alpha-prime subunit of cone phosphodiesterase, which is composed of a homodimer of two alpha-prime subunits and 3 smaller proteins of 11, 13, and 15 kDa. Mutations in this gene are associated with cone dystrophy type 4 (COD4). [provided by RefSeq, Mar 2010]. Publication Note: This RefSeq record includes a subset of the publications that are available for this gene. Please se…
HMGCL	-584	chr1:24152293-24152774	481	38	7	2.4654	4.2327	6.7951	chr1	24151949	24128366	-	NM_001166059	hydroxymethylglutaryl-CoA lyase, mitochondrial isoform 2 precursor	NP_001159531	3155	The protein encoded by this gene belongs to the HMG-CoA lyase family. It is a mitochondrial enzyme that catalyzes the final step of leucine degradation and plays a key role in ketone body formation. Mutations in this gene are associated with HMG-CoA lyase deficiency. Alternatively spliced transcript variants encoding different isoforms have been found for this gene. [provided by RefSeq, Oct 2009].
GABRA6	-1232	chr5:161111185-161111665	480	38	7	2.4654	4.2327	6.7951	chr5	161112657	161129598	+	NM_000811	gamma-aminobutyric acid receptor subunit alpha-6 precursor	NP_000802	2559	GABA is the major inhibitory neurotransmitter in the mammalian brain where it acts at GABA-A receptors, which are ligand-gated chloride channels. Chloride conductance of these channels can be modulated by agents such as benzodiazepines that bind to the GABA-A receptor. At least 16 distinct subunits of GABA-A receptors have been identified. [provided by RefSeq, Jul 2008]. Sequence Note: This RefSe…
DGKA	-441	chr12:56324264-56324744	480	38	7	2.4654	4.2327	6.7951	chr12	56324945	56347807	+	NM_001345	diacylglycerol kinase alpha	NP_001336	1606	The protein encoded by this gene belongs to the eukaryotic diacylglycerol kinase family. It acts as a modulator that competes with protein kinase C for the second messenger diacylglycerol in intracellular signaling pathways. It also plays an important role in the resynthesis of phosphatidylinositols and phosphorylating diacylglycerol to phosphatidic acid. Alternative splicing occurs at this locus…
RNF169	732	chr11:74460404-74460884	480	33	6	2.4593	4.037	5.9351	chr11	74459912	74553458	+	NM_001098638	RING finger protein 169	NP_001092108	254225
PRM1	1182	chr16:11373770-11374250	480	33	6	2.4593	4.037	5.9351	chr16	11375192	11374692	-	NM_002761	sperm protamine P1	NP_002752	5619
PHF20	1268	chr20:34360950-34361430	480	33	6	2.4593	4.037	5.9351	chr20	34359922	34538288	+	NM_016436	PHD finger protein 20	NP_057520	51230
OR7A10	638	chr19:14951811-14952291	480	33	6	2.4593	4.037	5.9351	chr19	14952689	14951759	-	NM_001005190	olfactory receptor 7A10	NP_001005190	390892	Olfactory receptors interact with odorant molecules in the nose, to initiate a neuronal response that triggers the perception of a smell. The olfactory receptor proteins are members of a large family of G-protein-coupled receptors (GPCR) arising from single coding-exon genes. Olfactory receptors share a 7-transmembrane domain structure with many neurotransmitter and hormone receptors and are resp…
OR4D5	366	chr11:123810449-123810929	480	33	6	2.4593	4.037	5.9351	chr11	123810323	123811280	+	NM_001001965	olfactory receptor 4D5	NP_001001965	219875	Olfactory receptors interact with odorant molecules in the nose, to initiate a neuronal response that triggers the perception of a smell. The olfactory receptor proteins are members of a large family of G-protein-coupled receptors (GPCR) arising from single coding-exon genes. Olfactory receptors share a 7-transmembrane domain structure with many neurotransmitter and hormone receptors and are resp…
MAP6	-1885	chr11:75381124-75381604	480	33	6	2.4593	4.037	5.9351	chr11	75379479	75313904	-	NM_207577	microtubule-associated protein 6 isoform 2	NP_997460	4135	This gene encodes a microtubule-associated protein. The encoded protein is a calmodulin-binding and calmodulin-regulated protein that is involved in microtubule stabilization. Two transcript variants encoding distinct isoforms have been identified for this gene. [provided by RefSeq, Jul 2008].
CPM	599	chr12:69326140-69326620	480	33	6	2.4593	4.037	5.9351	chr12	69326979	69244955	-	NM_198320	carboxypeptidase M precursor	NP_938079	1368	The protein encoded by this gene is a membrane-bound arginine/lysine carboxypeptidase. Its expression is associated with monocyte to macrophage differentiation. This encoded protein contains hydrophobic regions at the amino and carboxy termini and has 6 potential asparagine-linked glycosylation sites. The active site residues of carboxypeptidases A and B are conserved in this protein. Three alter…
LOC100288637	372	chr15:30938427-30938952	525	81	16	2.4545	5.3147	13.3686	chr15	30938317	31065209	+	NR_038253			100288637
TTC7B	1917	chr14:91280604-91281084	480	28	5	2.4512	3.8106	5.3142	chr14	91282761	91006931	-	NM_001010854	tetratricopeptide repeat protein 7B	NP_001010854	145567
SNRPF	1449	chr12:96253917-96254397	480	28	5	2.4512	3.8106	5.3142	chr12	96252708	96260238	+	NM_003095	small nuclear ribonucleoprotein F	NP_003086	6636
SCOC	-1375	chr4:141262981-141263461	480	28	5	2.4512	3.8106	5.3142	chr4	141264596	141303710	+	NM_001153635	short coiled-coil protein isoform 5	NP_001147107	60592	This gene encodes a short coiled-coiled domain-containing protein that localizes to the Golgi apparatus. The encoded protein interacts with ADP-ribosylation factor-like proteins. Pseudogenes of this gene are found on chromosomes 1 and 14. Alternative splicing results in multiple transcript variants. [provided by RefSeq, Apr 2009].
LPXN	515	chr11:58342635-58343115	480	28	5	2.4512	3.8106	5.3142	chr11	58343390	58294343	-	NM_004811	leupaxin isoform 2	NP_004802	9404	The product encoded by this gene is preferentially expressed in hematopoietic cells and belongs to the paxillin protein family. Similar to other members of this focal-adhesion-associated adaptor-protein family, it has four leucine-rich LD-motifs in the N-terminus and four LIM domains in the C-terminus. It may function in cell type-specific signaling by associating with PYK2, a member of focal adh…
LOC145474	-731	chr14:71953606-71954086	480	28	5	2.4512	3.8106	5.3142	chr14	71954577	71956420	+	NR_027046			145474
ING1	94	chr13:111367212-111367692	480	28	5	2.4512	3.8106	5.3142	chr13	111367358	111373421	+	NM_005537	inhibitor of growth protein 1 isoform D	NP_005528	3621	This gene encodes a tumor suppressor protein that can induce cell growth arrest and apoptosis. The encoded protein is a nuclear protein that physically interacts with the tumor suppressor protein TP53 and is a component of the p53 signaling pathway. Reduced expression and rearrangement of this gene have been detected in various cancers. Multiple alternatively spliced transcript variants encoding …
HEPH	-734	chrX:65383104-65383584	480	28	5	2.4512	3.8106	5.3142	chrX	65384078	65487230	+	NM_001130860	hephaestin isoform c	NP_001124332	9843	The protein encoded by this gene is similar to an iron transport protein found in mouse. The mouse protein is similar to ceruloplasmin, a serum multi-copper ferroxidase, and is thought to be a membrane-bound protein responsible for transport of dietary iron from epithelial cells of the intestinal lumen into the circulatory system. In mouse, defects in this gene can lead to severe microcytic anemi…
DLEC1	1410	chr3:38081865-38082345	480	28	5	2.4512	3.8106	5.3142	chr3	38080695	38164228	+	NM_007335	deleted in lung and esophageal cancer protein 1 isoform DLEC1-N1	NP_031361	9940	This gene contains 37 exons, spans approximately 59-kb, and is located in the 3p22-p21.3 chromosomal segment that is commonly deleted in various carcinomas. Several alternatively spliced transcripts have been observed that contain disrupted coding regions and likely encode nonfunctional proteins. Aberrant transcription of this gene may be involved in carcinogenesis of the lung, esophagus, and kid…
C5orf30	1403	chr5:102595604-102596084	480	28	5	2.4512	3.8106	5.3142	chr5	102594441	102614361	+	NM_033211	hypothetical protein LOC90355	NP_149988	90355
AP1B1	-991	chr22:29785323-29785803	480	28	5	2.4512	3.8106	5.3142	chr22	29784572	29723668	-	NM_145730	AP-1 complex subunit beta-1 isoform b	NP_663782	162	Adaptor protein complex 1 is found at the cytoplasmic face of coated vesicles located at the Golgi complex, where it mediates both the recruitment of clathrin to the membrane and the recognition of sorting signals within the cytosolic tails of transmembrane receptors. This complex is a heterotetramer composed of two large, one medium, and one small adaptin subunit. The protein encoded by this gen…
LOC100128946	-661	chr22:49261680-49262160	480	52	10	2.4503	4.6846	8.9053	chr22	49262581	49294198	+	NR_038944			100128946
ATF1	1376	chr12:51158924-51159404	480	52	10	2.4503	4.6846	8.9053	chr12	51157788	51214943	+	NM_005171	cyclic AMP-dependent transcription factor ATF-1	NP_005162	466	This gene encodes an activating transcription factor, which belongs to the ATF subfamily and bZIP (basic-region leucine zipper) family. It influences cellular physiologic processes by regulating the expression of downstream target genes, which are related to growth, survival, and other cellular activities. This protein is phosphorylated at serine 63 in its kinase-inducible domain by serine/threon…
HTATSF1	-1286	chrX:135577711-135578191	480	47	9	2.4443	4.5441	8.0449	chrX	135579237	135594503	+	NM_001163280	HIV Tat-specific factor 1	NP_001156752	27336	The protein encoded by this gene functions as a cofactor for the stimulation of transcriptional elongation by HIV-1 Tat, which binds to the HIV-1 promoter through Tat-TAR interaction. This protein may also serve as a dual-function factor to couple transcription and splicing and to facilitate their reciprocal activation. Alternatively spliced transcript variants have been found for this gene.[prov…
GNG11	-1756	chr7:93548993-93549525	532	47	9	2.4443	4.5441	8.0449	chr7	93551015	93555826	+	NM_004126	guanine nucleotide-binding protein G(I)/G(S)/G(O) subunit gamma-11 precursor	NP_004117	2791	This gene is a member of the guanine nucleotide-binding protein (G protein) gamma family and encodes a lipid-anchored, cell membrane protein. As a member of the heterotrimeric G protein complex, this protein plays a role in this transmembrane signaling system. This protein is also subject to carboxyl-terminal processing. Decreased expression of this gene is associated with splenic marginal zone l…
CA9	824	chr9:35674498-35674978	480	47	9	2.4443	4.5441	8.0449	chr9	35673914	35681154	+	NM_001216	carbonic anhydrase 9 precursor	NP_001207	768	Carbonic anhydrases (CAs) are a large family of zinc metalloenzymes that catalyze the reversible hydration of carbon dioxide. They participate in a variety of biological processes, including respiration, calcification, acid-base balance, bone resorption, and the formation of aqueous humor, cerebrospinal fluid, saliva, and gastric acid. They show extensive diversity in tissue distribution and in t…
MRPL12	1475	chr17:79671582-79672167	585	66	13	2.4419	5.0283	11.0201	chr17	79670399	79674556	+	NM_002949	39S ribosomal protein L12, mitochondrial precursor	NP_002940	6182	Mammalian mitochondrial ribosomal proteins are encoded by nuclear genes and help in protein synthesis within the mitochondrion. Mitochondrial ribosomes (mitoribosomes) consist of a small 28S subunit and a large 39S subunit. They have an estimated 75% protein to rRNA composition compared to prokaryotic ribosomes, where this ratio is reversed. Another difference between mammalian mitoribosomes and …
SUB1	1135	chr5:32586499-32586979	480	23	4	2.4401	3.542	4.4558	chr5	32585604	32604185	+	NM_006713	activated RNA polymerase II transcriptional coactivator p15	NP_006704	10923
SPRY3	1755	chrY:59101971-59102451	480	23	4	2.4401	3.542	4.4558	chrY	59100456	59115123	+	NM_005840	protein sprouty homolog 3	NP_005831	10251
LIN9	590	chr1:226496368-226496848	480	23	4	2.4401	3.542	4.4558	chr1	226497198	226418860	-	NM_173083	protein lin-9 homolog	NP_775106	286826
INSIG2	-1221	chr2:118844588-118845068	480	23	4	2.4401	3.542	4.4558	chr2	118846049	118867597	+	NM_016133	insulin-induced gene 2 protein	NP_057217	51141	The protein encoded by this gene is highly similar to the protein product encoded by gene INSIG1. Both INSIG1 protein and this protein are endoplasmic reticulum proteins that block the processing of sterol regulatory element binding proteins (SREBPs) by binding to SREBP cleavage-activating protein (SCAP), and thus prevent SCAP from escorting SREBPs to the Golgi. [provided by RefSeq, Jul 2008]. Pu…
CA5B	-882	chrX:15755289-15755769	480	23	4	2.4401	3.542	4.4558	chrX	15756411	15805748	+	NM_007220	carbonic anhydrase 5B, mitochondrial precursor	NP_009151	11238	Carbonic anhydrases (CAs) are a large family of zinc metalloenzymes that catalyze the reversible hydration of carbon dioxide. They participate in a variety of biological processes, including respiration, calcification, acid-base balance, bone resorption, and the formation of aqueous humor, cerebrospinal fluid, saliva, and gastric acid. They show extensive diversity in tissue distribution and in t…
BOLL	1102	chr2:198648732-198649212	480	23	4	2.4401	3.542	4.4558	chr2	198650074	198591602	-	NM_033030	protein boule-like isoform 2	NP_149019	66037	This gene belongs to the DAZ gene family required for germ cell development. It encodes an RNA-binding protein which is more similar to Drosophila Boule than to human proteins encoded by genes DAZ (deleted in azoospermia) or DAZL (deleted in azoospermia-like). Loss of this gene function results in the absence of sperm in semen (azoospermia). Histological studies demonstrated that the primary defe…
OR4M2	928	chr15:22369165-22369645	480	42	8	2.4369	4.3884	7.4192	chr15	22368477	22369561	+	NM_001004719	olfactory receptor 4M2	NP_001004719	390538	Olfactory receptors interact with odorant molecules in the nose, to initiate a neuronal response that triggers the perception of a smell. The olfactory receptor proteins are members of a large family of G-protein-coupled receptors (GPCR) arising from single coding-exon genes. Olfactory receptors share a 7-transmembrane domain structure with many neurotransmitter and hormone receptors and are resp…
LGALS3	1542	chr14:55597215-55597738	523	42	8	2.4369	4.3884	7.4192	chr14	55595934	55612148	+	NM_002306	galectin-3 isoform 1	NP_002297	3958	This gene encodes a member of the galectin family of carbohydrate binding proteins. Members of this protein family have an affinity for beta-galactosides. The encoded protein is characterized by an N-terminal proline-rich tandem repeat domain and a single C-terminal carbohydrate recognition domain. This protein can self-associate through the N-terminal domain allowing it to bind to multivalent sa…
PSORS1C1	1483	chr6:31083850-31084330	480	56	11	2.4302	4.8	9.5322	chr6	31082607	31107869	+	NM_014068	psoriasis susceptibility 1 candidate 1	NP_054787	170679	This gene is one of several genes thought to confer susceptibility to psoriasis and systemic sclerosis, located on chromosome 6 near the major histocompatibility complex (MHC) class I region. [provided by RefSeq, Sep 2011]. Publication Note: This RefSeq record includes a subset of the publications that are available for this gene. Please see the Gene record to access additional publications.
UBL7	427	chr15:74752843-74753323	480	37	7	2.4278	4.2139	6.5589	chr15	74753510	74738317	-	NM_032907	ubiquitin-like protein 7	NP_116296	84993
PPP2R2C	-383	chr4:6422988-6423468	480	37	7	2.4278	4.2139	6.5589	chr4	6422845	6322304	-	NM_001206996	protein phosphatase 2, regulatory subunit B, gamma isoform d	NP_001193925	5522	The product of this gene belongs to the phosphatase 2 regulatory subunit B family. Protein phosphatase 2 is one of the four major Ser/Thr phosphatases, and it is implicated in the negative control of cell growth and division. It consists of a common heteromeric core enzyme, which is composed of a catalytic subunit and a constant regulatory subunit, that associates with a variety of regulatory sub…
OSTF1	1612	chr9:77704769-77705249	480	37	7	2.4278	4.2139	6.5589	chr9	77703397	77762114	+	NM_012383	osteoclast-stimulating factor 1	NP_036515	26578	Osteoclast-stimulating factor-1 is an intracellular protein produced by osteoclasts that indirectly induces osteoclast formation and bone resorption (Reddy et al., 1998 [PubMed 10092216]).[supplied by OMIM, Mar 2008]. Sequence Note: This RefSeq record was created from transcript and genomic sequence data because no single transcript was available for the full length of the gene. The extent of thi…
NRG2	-1502	chr5:139424146-139424626	480	37	7	2.4278	4.2139	6.5589	chr5	139422884	139226363	-	NM_001184935	pro-neuregulin-2, membrane-bound isoform isoform 7	NP_001171864	9542	This gene encodes a novel member of the neuregulin family of growth and differentiation factors. Through interaction with the ERBB family of receptors, this protein induces the growth and differentiation of epithelial, neuronal, glial, and other types of cells. The gene consists of 12 exons and the genomic structure is similar to that of neuregulin 1, another member of the neuregulin family of li…
MIR150	22	chr19:50003863-50004343	480	37	7	2.4278	4.2139	6.5589	chr19	50004125	50004041	-	NR_029703			406942	microRNAs (miRNAs) are short (20-24 nt) non-coding RNAs that are involved in post-transcriptional regulation of gene expression in multicellular organisms by affecting both the stability and translation of mRNAs. miRNAs are transcribed by RNA polymerase II as part of capped and polyadenylated primary transcripts (pri-miRNAs) that can be either protein-coding or non-coding. The primary transcript …
CD300E	-441	chr17:72620098-72620578	480	37	7	2.4278	4.2139	6.5589	chr17	72619897	72606021	-	NM_181449	CMRF35-like molecule 2 precursor	NP_852114	342510	CD300LE is an activating receptor of the immunoglobulin (Ig) superfamily expressed on myeloid cells. It mediates activating signals by interacting with DAP12 (TYROBP; MIM 604142) (Aguilar et al., 2004 [PubMed 15557162]).[supplied by OMIM, Mar 2008]. Sequence Note: This RefSeq record was created from transcript and genomic sequence data to make the sequence consistent with the reference genome ass…
CPS1	1951	chr2:211423033-211423513	480	51	10	2.4227	4.6708	8.6718	chr2	211421322	211543831	+	NM_001875	carbamoyl-phosphate synthase [ammonia], mitochondrial isoform b precursor	NP_001866	1373	The mitochondrial enzyme encoded by this gene catalyzes synthesis of carbamoyl phosphate from ammonia and bicarbonate. This reaction is the first committed step of the urea cycle, which is important in the removal of excess urea from cells. The encoded protein may also represent a core mitochondrial nucleoid protein. Three transcript variants encoding different isoforms have been found for this g…
VN1R1	-310	chr19:57968176-57968658	482	65	13	2.4202	5.0174	10.7881	chr19	57968107	57966541	-	NM_020633	vomeronasal type-1 receptor 1	NP_065684	57191	Pheromones are chemical signals that elicit specific behavioral responses and physiologic alterations in recipients of the same species. The protein encoded by this gene is similar to pheromone receptors and is primarily localized to the olfactory mucosa. An alternate splice variant of this gene is thought to exist, but its full length nature has not been determined. [provided by RefSeq, Jul 2008…
VNN2	1721	chr6:133082637-133083117	480	32	6	2.416	4.0154	5.6985	chr6	133084598	133065008	-	NM_078488	vascular non-inflammatory molecule 2 isoform 2	NP_511043	8875	This gene product is a member of the Vanin family of proteins that share extensive sequence similarity with each other, and also with biotinidase. The family includes secreted and membrane-associated proteins, a few of which have been reported to participate in hematopoietic cell trafficking. No biotinidase activity has been demonstrated for any of the vanin proteins, however, they possess pantet…
SNORD52	-137	chr6:31804475-31804955	480	32	6	2.416	4.0154	5.6985	chr6	31804852	31804916	+	NR_002742			26797
NRXN2	1316	chr11:64489104-64489584	480	32	6	2.416	4.0154	5.6985	chr11	64490660	64373645	-	NM_138732	neurexin-2-beta isoform alpha-2 precursor	NP_620060	9379	This gene encodes a member of the neurexin gene family. The products of these genes function as cell adhesion molecules and receptors in the vertebrate nervous system. These genes utilize two promoters. The majority of transcripts are produced from the upstream promoter and encode alpha-neurexin isoforms while a smaller number of transcripts are produced from the downstream promoter and encode be…
MIR1208	870	chr8:129162991-129163471	480	32	6	2.416	4.0154	5.6985	chr8	129162361	129162434	+	NR_031613			100302281	microRNAs (miRNAs) are short (20-24 nt) non-coding RNAs that are involved in post-transcriptional regulation of gene expression in multicellular organisms by affecting both the stability and translation of mRNAs. miRNAs are transcribed by RNA polymerase II as part of capped and polyadenylated primary transcripts (pri-miRNAs) that can be either protein-coding or non-coding. The primary transcript …
KRT36	1538	chr17:39644338-39644818	480	32	6	2.416	4.0154	5.6985	chr17	39646116	39642387	-	NM_003771	keratin, type I cuticular Ha6	NP_003762	8689	The protein encoded by this gene is a member of the keratin gene family. This type I hair keratin is an acidic protein which heterodimerizes with type II keratins to form hair and nails. The type I hair keratins are clustered in a region of chromosome 17q12-q21 and have the same direction of transcription. [provided by RefSeq, Jul 2008].
ETNK2	1669	chr1:204119398-204119878	480	32	6	2.416	4.0154	5.6985	chr1	204121307	204100189	-	NM_018208	ethanolamine kinase 2	NP_060678	55224	The protein encoded by this gene is a member of choline/ethanolamine kinase family which catalyzes the first step of phosphatidylethanolamine (PtdEtn) biosynthesis via the cytidine diphosphate (CDP) ethanolamine pathway. [provided by RefSeq, Jul 2008].
DTNA	-1542	chr18:32071471-32071951	480	32	6	2.416	4.0154	5.6985	chr18	32073253	32409292	+	NM_001392	dystrobrevin alpha isoform 7	NP_001383	1837	The protein encoded by this gene belongs to the dystrobrevin subfamily of the dystrophin family. This protein is a component of the dystrophin-associated protein complex (DPC), which consists of dystrophin and several integral and peripheral membrane proteins, including dystroglycans, sarcoglycans, syntrophins and alpha- and beta-dystrobrevin. The DPC localizes to the sarcolemma and its disruptio…
CES4A	1622	chr16:67023873-67024353	480	32	6	2.416	4.0154	5.6985	chr16	67022491	67043659	+	NM_173815	carboxylesterase 4A isoform 1 precursor	NP_776176	283848	This gene encodes a member of the carboxylesterase large family. The family members are responsible for the hydrolysis or transesterification of various xenobiotics, such as cocaine and heroin, and endogenous substrates with ester, thioester, or amide bonds. They also participate in fatty acyl and cholesterol ester metabolism, and may play a role in the blood-brain barrier system. This gene, also…
CACYBP	1590	chr1:174970241-174970721	480	32	6	2.416	4.0154	5.6985	chr1	174968891	174981163	+	NM_014412	calcyclin-binding protein isoform 1	NP_055227	27101	The protein encoded by this gene is a calcyclin binding protein. It may be involved in calcium-dependent ubiquitination and subsequent proteosomal degradation of target proteins. It probably serves as a molecular bridge in ubiquitin E3 complexes and participates in the ubiquitin-mediated degradation of beta-catenin. Two alternatively spliced transcript variants encoding different isoforms have be…
LOC729668	-261	chr10:30663398-30663878	480	46	9	2.4138	4.5288	7.8114	chr10	30663377	30653255	-	NR_003524			729668
LFNG	-1106	chr7:2556150-2556630	480	46	9	2.4138	4.5288	7.8114	chr7	2557496	2568063	+	NM_002304	beta-1,3-N-acetylglucosaminyltransferase lunatic fringe isoform d	NP_002295	3955	This gene is a member of the fringe gene family which also includes radical and manic fringe genes. They all encode evolutionarily conserved glycosyltransferases that act in the Notch signaling pathway to define boundaries during embryonic development. While their genomic structure is distinct from other glycosyltransferases, fringe proteins have a fucose-specific beta-1,3-N-acetylglucosaminyltra…
MIR4776-2	-628	chr2:213791448-213791928	480	55	11	2.4045	4.7872	9.2995	chr2	213791060	213790980	-	NR_039936			100616472	microRNAs (miRNAs) are short (20-24 nt) non-coding RNAs that are involved in post-transcriptional regulation of gene expression in multicellular organisms by affecting both the stability and translation of mRNAs. miRNAs are transcribed by RNA polymerase II as part of capped and polyadenylated primary transcripts (pri-miRNAs) that can be either protein-coding or non-coding. The primary transcript …
C1orf106	-603	chr1:200863055-200863636	581	55	11	2.4045	4.7872	9.2995	chr1	200863948	200884864	+	NM_001142569	hypothetical protein LOC55765 isoform 2	NP_001136041	55765
TTC39C	-1107	chr18:21571389-21571869	480	41	8	2.4028	4.3713	7.1845	chr18	21572736	21715574	+	NM_153211	tetratricopeptide repeat protein 39C isoform 2	NP_694943	125488
PAGE5	-980	chrX:55245570-55246050	480	41	8	2.4028	4.3713	7.1845	chrX	55246790	55250541	+	NM_130467	G antigen family E member 1 isoform 1	NP_569734	90737	This gene is a member of the GAGE family, which is expressed in a variety of tumors and in some fetal and reproductive tissues. The protein encoded by this gene shares a sequence similarity with other GAGE/PAGE proteins. It may also belong to a family of CT (cancer-testis) antigens. Multiple alternatively spliced transcript variants encoding distinct isoforms have been found for this gene, but th…
NKRF	-1302	chrX:118728175-118728655	480	41	8	2.4028	4.3713	7.1845	chrX	118727113	118722299	-	NM_001173488	NF-kappa-B-repressing factor isoform 2	NP_001166959	55922	This gene encodes a transcriptional repressor that interacts with specific negative regulatory elements to mediate transcriptional repression of certain nuclear factor kappa B responsive genes. The protein localizes predominantly to the nucleolus with a small fraction found in the nucleoplasm and cytoplasm. Alternate splicing results in multiple transcript variants. [provided by RefSeq, Mar 2010].
CA11	124	chr19:49149087-49149567	480	41	8	2.4028	4.3713	7.1845	chr19	49149451	49141271	-	NM_001217	carbonic anhydrase-related protein 11 precursor	NP_001208	770	Carbonic anhydrases (CAs) are a large family of zinc metalloenzymes that catalyze the reversible hydration of carbon dioxide. They participate in a variety of biological processes, including respiration, calcification, acid-base balance, bone resorption, and the formation of aqueous humor, cerebrospinal fluid, saliva, and gastric acid. They show extensive diversity in tissue distribution and in t…
VENTXP7	-713	chr3:21446264-21446744	480	27	5	2.4004	3.7852	5.0753	chr3	21447217	21448177	+	NR_002311			391518	Homeobox genes encode DNA-binding proteins, many of which are thought to be involved in early embryonic development. Homeobox genes encode a DNA-binding domain of 60 to 63 amino acids referred to as the homeodomain. This pseudogene is a member of the Vent homeobox gene family. [provided by RefSeq, Jul 2008].
TLR2	1798	chr4:154606998-154607478	480	27	5	2.4004	3.7852	5.0753	chr4	154605440	154627242	+	NM_003264	toll-like receptor 2 precursor	NP_003255	7097	The protein encoded by this gene is a member of the Toll-like receptor (TLR) family which plays a fundamental role in pathogen recognition and activation of innate immunity. TLRs are highly conserved from Drosophila to humans and share structural and functional similarities. They recognize pathogen-associated molecular patterns (PAMPs) that are expressed on infectious agents, and mediate the prod…
NR5A2	-1280	chr1:199995249-199995729	480	27	5	2.4004	3.7852	5.0753	chr1	199996769	200146550	+	NM_003822	nuclear receptor subfamily 5 group A member 2 isoform 2	NP_003813	2494
LGR4	147	chr11:27493947-27494427	480	27	5	2.4004	3.7852	5.0753	chr11	27494334	27387507	-	NM_018490	leucine-rich repeat-containing G-protein coupled receptor 4 precursor	NP_060960	55366	G protein-coupled receptors (GPCRs) play key roles in a variety of physiologic functions. Members of the leucine-rich GPCR (LGR) family, such as GPR48, have multiple N-terminal leucine-rich repeats (LRRs) and a 7-transmembrane domain (Weng et al., 2008 [PubMed 18424556]).[supplied by OMIM, Aug 2008].
GK5	-596	chr3:141944805-141945285	480	27	5	2.4004	3.7852	5.0753	chr3	141944449	141876368	-	NM_001039547	putative glycerol kinase 5	NP_001034636	256356
FLJ41941	342	chr22:18512252-18512732	480	27	5	2.4004	3.7852	5.0753	chr22	18512150	18520734	+	NR_024417			100192420
DNAH9	-508	chr17:11500999-11501479	480	27	5	2.4004	3.7852	5.0753	chr17	11501747	11873065	+	NM_001372	dynein heavy chain 9, axonemal isoform 2	NP_001363	1770	This gene encodes the heavy chain subunit of axonemal dynein, a large multi-subunit molecular motor. Axonemal dynein attaches to microtubules and hydrolyzes ATP to mediate the movement of cilia and flagella. The gene expresses at least two transcript variants; additional variants have been described, but their full length nature has not been determined. [provided by RefSeq, Jul 2008].
ALDH7A1	1404	chr5:125929438-125929918	480	27	5	2.4004	3.7852	5.0753	chr5	125931082	125877532	-	NM_001201377	alpha-aminoadipic semialdehyde dehydrogenase isoform 2	NP_001188306	501	The protein encoded by this gene is a member of subfamily 7 in the aldehyde dehydrogenase gene family. These enzymes are thought to play a major role in the detoxification of aldehydes generated by alcohol metabolism and lipid peroxidation. This particular member has homology to a previously described protein from the green garden pea, the 26g pea turgor protein. It is also involved in lysine cat…
RPL35A	853	chr3:197677664-197678144	480	50	10	2.3946	4.6567	8.4393	chr3	197677051	197682721	+	NM_000996	60S ribosomal protein L35a	NP_000987	6165	Ribosomes, the organelles that catalyze protein synthesis, consist of a small 40S subunit and a large 60S subunit. Together these subunits are composed of 4 RNA species and approximately 80 structurally distinct proteins. This gene encodes a ribosomal protein that is a component of the 60S subunit. The protein belongs to the L35AE family of ribosomal proteins. It is located in the cytoplasm. The …
RBM39	1150	chr20:34328868-34329348	480	50	10	2.3946	4.6567	8.4393	chr20	34330258	34291530	-	NM_001242600	RNA-binding protein 39 isoform d	NP_001229529	9584	This gene encodes a member of the U2AF65 family of proteins. The encoded protein is found in the nucleus, where it co-localizes with core spliceosomal proteins. It has been shown to play a role in both steroid hormone receptor-mediated transcription and alternative splicing, and it is also a transcriptional coregulator of the viral oncoprotein v-Rel. Multiple transcript variants have been observe…
TMPRSS9	1952	chr19:2391495-2391975	480	36	7	2.3891	4.1946	6.324	chr19	2389783	2426086	+	NM_182973	transmembrane protease serine 9	NP_892018	360200
CYP2U1	-315	chr4:108852161-108852641	480	36	7	2.3891	4.1946	6.324	chr4	108852716	108874613	+	NM_183075	cytochrome P450 2U1	NP_898898	113612	This gene encodes a member of the cytochrome P450 superfamily of enzymes. The cytochrome P450 proteins are monooxygenases which catalyze many reactions involved in drug metabolism and synthesis of cholesterol, steroids and other lipids. This enzyme is a hydroxylase that metabolizes arachidonic acid, docosahexaenoic acid, and other long chain fatty acids. [provided by RefSeq, Jul 2008].
RCC1	1459	chr1:28845860-28846547	687	59	12	2.389	4.8949	9.697	chr1	28844744	28865708	+	NM_001269	regulator of chromosome condensation isoform c	NP_001260	1104
SCGB1D2	-1551	chr11:62007932-62008412	480	68	14	2.385	5.0994	10.9565	chr11	62009723	62012280	+	NM_006551	secretoglobin family 1D member 2 precursor	NP_006542	10647	The protein encoded by this gene is a member of the lipophilin subfamily, part of the uteroglobin superfamily, and is an ortholog of prostatein, the major secretory glycoprotein of the rat ventral prostate gland. Lipophilin gene products are widely expressed in normal tissues, especially in endocrine-responsive organs. Assuming that human lipophilins are the functional counterparts of prostatein,…
ZNF24	-371	chr18:32924557-32925037	480	22	4	2.3785	3.5112	4.2158	chr18	32924426	32912177	-	NM_006965	zinc finger protein 24	NP_008896	7572
SNORD115-41	-527	chr15:25489857-25490337	480	22	4	2.3785	3.5112	4.2158	chr15	25490624	25490706	+	NR_003356			100033815
SLC26A9	-1272	chr1:205913620-205914100	480	22	4	2.3785	3.5112	4.2158	chr1	205912588	205882176	-	NM_052934	solute carrier family 26 member 9 isoform a	NP_443166	115019	This gene is one member of a family of sulfate/anion transporter genes. Family members are well conserved in their genomic (number and size of exons) and protein (aa length among species) structures yet have markedly different tissue expression patterns. The product of this gene is a highly selective chloride ion channel regulated by WNK kinases. Alternative splicing results in multiple transcrip…
MEGF10	240	chr5:126626455-126626935	480	22	4	2.3785	3.5112	4.2158	chr5	126626455	126796910	+	NM_032446	multiple epidermal growth factor-like domains protein 10 precursor	NP_115822	84466
ITGB1	1148	chr10:33245434-33245914	480	22	4	2.3785	3.5112	4.2158	chr10	33246822	33189245	-	NM_133376	integrin beta-1 isoform 1A precursor	NP_596867	3688	Integrins are heterodimeric proteins made up of alpha and beta subunits. At least 18 alpha and 8 beta subunits have been described in mammals. Integrin family members are membrane receptors involved in cell adhesion and recognition in a variety of processes including embryogenesis, hemostasis, tissue repair, immune response and metastatic diffusion of tumor cells. This gene encodes a beta subunit…
IFI44	-917	chr1:79114319-79114799	480	22	4	2.3785	3.5112	4.2158	chr1	79115476	79129763	+	NM_006417	interferon-induced protein 44	NP_006408	10561
NETO1	171	chr18:70532523-70533003	480	54	11	2.3784	4.7742	8.8373	chr18	70532934	70501274	-	NM_138999	neuropilin and tolloid-like protein 1 isoform 1 precursor	NP_620552	81832	This gene encodes a predicted transmembrane protein containing two extracellular CUB domains followed by a low-density lipoprotein class A (LDLa) domain. A similar gene in mice encodes a protein that plays a critical role in spatial learning and memory by regulating the function of synaptic N-methyl-D-aspartic acid receptor complexes in the hippocampus. Alternatively spliced transcript variants e…
CLLU1	-1531	chr12:92813400-92814151	751	54	11	2.3784	4.7742	8.8373	chr12	92815306	92824778	+	NR_027933			574028
KRT73	1474	chr12:53010530-53011208	678	63	13	2.3756	4.9951	10.3266	chr12	53012343	53001353	-	NM_175068	keratin, type II cytoskeletal 73	NP_778238	319101	Keratins are intermediate filament proteins responsible for the structural integrity of epithelial cells and are subdivided into epithelial keratins and hair keratins. This gene encodes a protein that is expressed in the inner root sheath of hair follicles. The type II keratins are clustered in a region of chromosome 12q13.[provided by RefSeq, Jun 2009].
XAGE5	77	chrX:52841064-52841544	480	31	6	2.3714	3.9931	5.4636	chrX	52841227	52847322	+	NM_130775	G antigen family D member 5	NP_570131	170627	This gene is a member of the XAGE subfamily, which belongs to the GAGE family. The GAGE genes are expressed in a variety of tumors and in some fetal and reproductive tissues. The protein encoded by this gene shares a sequence similarity with other GAGE/PAGE proteins. Because of the expression pattern and the sequence similarity, this protein also belongs to a family of CT (cancer-testis) antigens…
NARG2	500	chr15:60770604-60771084	480	31	6	2.3714	3.9931	5.4636	chr15	60771344	60711807	-	NM_001018089	NMDA receptor-regulated protein 2 isoform b	NP_001018099	79664
IFNG	-653	chr12:68553934-68554414	480	31	6	2.3714	3.9931	5.4636	chr12	68553521	68548549	-	NM_000619	interferon gamma precursor	NP_000610	3458	This gene encodes a member of the type II interferon family. The protein encoded is a soluble cytokine with antiviral, immunoregulatory and anti-tumor properties and is a potent activator of macrophages. Mutations in this gene are associated with aplastic anemia.[provided by RefSeq, Nov 2009]. Publication Note: This RefSeq record includes a subset of the publications that are available for this g…
GNB5	-1799	chr15:52473721-52474201	480	31	6	2.3714	3.9931	5.4636	chr15	52472162	52413122	-	NM_006578	guanine nucleotide-binding protein subunit beta-5 isoform a	NP_006569	10681	Heterotrimeric guanine nucleotide-binding proteins (G proteins), which integrate signals between receptors and effector proteins, are composed of an alpha, a beta, and a gamma subunit. These subunits are encoded by families of related genes. This gene encodes a beta subunit. Beta subunits are important regulators of alpha subunits, as well as of certain signal transduction receptors and effectors…
FAM120B	276	chr6:170615879-170616359	480	31	6	2.3714	3.9931	5.4636	chr6	170615843	170714237	+	NM_032448	constitutive coactivator of peroxisome proliferator-activated receptor gamma	NP_115824	84498
BCO2	-1406	chr11:112044561-112045041	480	31	6	2.3714	3.9931	5.4636	chr11	112046207	112089649	+	NM_031938	beta,beta-carotene 9',10'-oxygenase isoform a	NP_114144	83875	BCDO2 catalyzes the asymmetric oxidative cleavage of beta-carotene in carotene metabolism (Kiefer et al., 2001 [PubMed 11278918]).[supplied by OMIM, Mar 2008].
AQP8	-1701	chr16:25226343-25226823	480	31	6	2.3714	3.9931	5.4636	chr16	25228284	25240253	+	NM_001169	aquaporin-8	NP_001160	343	Aquaporin 8 (AQP8) is a water channel protein. Aquaporins are a family of small integral membrane proteins related to the major intrinsic protein (MIP or AQP0). Aquaporin 8 mRNA is found in pancreas and colon but not other tissues. [provided by RefSeq, Jul 2008]. Publication Note: This RefSeq record includes a subset of the publications that are available for this gene. Please see the Gene record…
ZC3H12D	541	chr6:149805367-149805847	480	40	8	2.3679	4.3539	6.719	chr6	149806148	149768765	-	NM_207360	probable ribonuclease ZC3H12D	NP_997243	340152
EDIL3	1440	chr5:83678931-83679411	480	40	8	2.3679	4.3539	6.719	chr5	83680611	83238125	-	NM_005711	EGF-like repeat and discoidin I-like domain-containing protein 3 precursor	NP_005702	10085	The protein encoded by this gene is an integrin ligand. It plays an important role in mediating angiogenesis and may be important in vessel wall remodeling and development. It also influences endothelial cell behavior. [provided by RefSeq, Jul 2008].
TSHZ2	-1081	chr20:51800500-51800980	480	49	10	2.3659	4.6424	8.2079	chr20	51801821	52111869	+	NM_001193421	teashirt homolog 2 isoform 2	NP_001180350	128553
PVRIG	-173	chr7:99816453-99816942	489	67	14	2.3639	5.0888	10.7276	chr7	99816870	99819111	+	NM_024070	transmembrane protein PVRIG	NP_076975	79037
PAQR7	-1200	chr1:26198704-26199184	480	44	9	2.3508	4.4973	7.348	chr1	26197744	26187974	-	NM_178422	membrane progestin receptor alpha	NP_848509	164091
IBTK	-1478	chr6:82958686-82959166	480	44	9	2.3508	4.4973	7.348	chr6	82957448	82879955	-	NM_015525	inhibitor of Bruton tyrosine kinase	NP_056340	25998	The protein encoded by this gene binds to Bruton's tyrosine kinase (BTK) and downregulates BTK's kinase activity. In addition, the encoded protein disrupts BTK-mediated calcium mobilization and negatively regulates the activation of nuclear factor-kappa-B-driven transcription. [provided by RefSeq, Jul 2008].
CNR1	-640	chr6:88855456-88855936	480	44	9	2.3508	4.4973	7.348	chr6	88855056	88849584	-	NM_033181	cannabinoid receptor 1 isoform b	NP_149421	1268	This gene encodes one of two cannabinoid receptors. The cannabinoids, principally delta-9-tetrahydrocannabinol and synthetic analogs, are psychoactive ingredients of marijuana. The cannabinoid receptors are members of the guanine-nucleotide-binding protein (G-protein) coupled receptor family, which inhibit adenylate cyclase activity in a dose-dependent, stereoselective and pertussis toxin-sensiti…
C19orf45	1429	chr19:7563633-7564113	480	44	9	2.3508	4.4973	7.348	chr19	7562444	7573336	+	NM_198534	hypothetical protein LOC374877	NP_940936	374877
ATF4	1777	chr22:39918105-39918585	480	44	9	2.3508	4.4973	7.348	chr22	39916568	39918691	+	NM_001675	cyclic AMP-dependent transcription factor ATF-4	NP_001666	468	This gene encodes a transcription factor that was originally identified as a widely expressed mammalian DNA binding protein that could bind a tax-responsive enhancer element in the LTR of HTLV-1. The encoded protein was also isolated and characterized as the cAMP-response element binding protein 2 (CREB-2). The protein encoded by this gene belongs to a family of DNA-binding proteins that includes…
PSG3	-1556	chr19:43245984-43246464	480	35	7	2.3494	4.1747	6.0907	chr19	43244668	43225793	-	NM_021016	pregnancy-specific beta-1-glycoprotein 3 precursor	NP_066296	5671	The human pregnancy-specific glycoproteins (PSGs) are a family of proteins that are synthesized in large amounts by placental trophoblasts and released into the maternal circulation during pregnancy. Molecular cloning and analysis of several PSG genes has indicated that the PSGs form a subgroup of the carcinoembryonic antigen (CEA) gene family, which belongs to the immunoglobulin superfamily of g…
OR13C8	309	chr9:107331517-107331997	480	35	7	2.3494	4.1747	6.0907	chr9	107331448	107332411	+	NM_001004483	olfactory receptor 13C8	NP_001004483	138802	Olfactory receptors interact with odorant molecules in the nose, to initiate a neuronal response that triggers the perception of a smell. The olfactory receptor proteins are members of a large family of G-protein-coupled receptors (GPCR) arising from single coding-exon genes. Olfactory receptors share a 7-transmembrane domain structure with many neurotransmitter and hormone receptors and are resp…
AHCTF1	-1269	chr1:247095755-247096235	480	35	7	2.3494	4.1747	6.0907	chr1	247094726	247002401	-	NM_015446	protein ELYS	NP_056261	25909
TXNDC16	1959	chr14:53017102-53017582	480	26	5	2.3477	3.7588	4.8383	chr14	53019301	52897307	-	NM_020784	thioredoxin domain-containing protein 16 isoform	NP_065835	57544
TKTL2	-823	chr4:164395630-164396110	480	26	5	2.3477	3.7588	4.8383	chr4	164395047	164392246	-	NM_032136	transketolase-like protein 2	NP_115512	84076
SULT1C2P1	-1593	chr2:108936860-108937340	480	26	5	2.3477	3.7588	4.8383	chr2	108938693	108970254	+	NR_037191			151234
SFRP5	914	chr10:99530602-99531082	480	26	5	2.3477	3.7588	4.8383	chr10	99531756	99526507	-	NM_003015	secreted frizzled-related protein 5 precursor	NP_003006	6425	Secreted frizzled-related protein 5 (SFRP5) is a member of the SFRP family that contains a cysteine-rich domain homologous to the putative Wnt-binding site of Frizzled proteins. SFRPs act as soluble modulators of Wnt signaling. SFRP5 and SFRP1 may be involved in determining the polarity of photoreceptor cells in the retina. SFRP5 is highly expressed in the retinal pigment epithelium, and moderate…
PIK3CB	-213	chr3:138478158-138478638	480	26	5	2.3477	3.7588	4.8383	chr3	138478185	138374230	-	NM_006219	phosphatidylinositol-4,5-bisphosphate 3-kinase catalytic subunit beta isoform	NP_006210	5291	Phosphoinositide 3-kinases (PI3Ks) phosphorylate the 3-prime OH position of the inositol ring of inositol lipids. They have been implicated as participants in signaling pathways regulating cell growth by virtue of their activation in response to various mitogenic stimuli. PI3Ks are composed of a 110-kD catalytic subunit, such as PIK3CB, and an 85-kD adaptor subunit (Hu et al., 1993 [PubMed 824698…
PAIP1	-97	chr5:43557052-43557532	480	26	5	2.3477	3.7588	4.8383	chr5	43557195	43526369	-	NM_182789	polyadenylate-binding protein-interacting protein 1 isoform 2	NP_877590	10605	The protein encoded by this gene interacts with poly(A)-binding protein and with the cap-binding complex eIF4A. It is involved in translational initiation and protein biosynthesis. Overexpression of this gene in COS7 cells stimulates translation. Alternative splicing occurs at this locus and three transcript variants encoding three distinct isoforms have been identified. [provided by RefSeq, Jul …
MIR4255	1407	chr1:37628330-37628810	480	26	5	2.3477	3.7588	4.8383	chr1	37627163	37627235	+	NR_036217			100422898	microRNAs (miRNAs) are short (20-24 nt) non-coding RNAs that are involved in post-transcriptional regulation of gene expression in multicellular organisms by affecting both the stability and translation of mRNAs. miRNAs are transcribed by RNA polymerase II as part of capped and polyadenylated primary transcripts (pri-miRNAs) that can be either protein-coding or non-coding. The primary transcript …
[truncated: 346 more rows]

## Sheet: S4_DM Vs Control (hypo)
Diabetes Vs Control hypomethylated DMRs in promoter (by MANorm) Column A: GeneName, the name of DMR-associated gene. Column B: DMR_To_TSS, the distance of DMR (middle position) to TSS. Positive value indicates downstream, and negative value indicates upstream. Column C: DMR_Locus, the genomic locus of DMR. Column D: DMR_Length, the length of DMR. Column E ~ F: RawTagCount, raw tag count of each g…
[truncated: 256 more rows]

## Sheet: S5_DM Vs Pre-DM (hyper)
Diabetes Vs Prediabetes hypermethylated DMRs in promoter (by MANorm) Column A: GeneName, the name of DMR-associated gene. Column B: DMR_To_TSS, the distance of DMR (middle position) to TSS. Positive value indicates downstream, and negative value indicates upstream. Column C: DMR_Locus, the genomic locus of DMR. Column D: DMR_Length, the length of DMR. Column E ~ F: RawTagCount, raw tag count of e…
[truncated: 1,100 more rows]

[truncated: 19 more sheets: S6_DM Vs Pre-DM (hypo), BP1_DM vs Control (down), BP2_DM vs Controls (up), BP3_DM vs Pre-DM (down), BP4_DM vs Pre-DM (up), BP5_Pre-DM vs control (down), BP6_Pre-DM vs control (up), CP1_DM vs Control (down), CP2_DM vs Controls (up, CP3_DM vs Pre-DM (down), CP4_DM vs Pre-DM (up), , CP5_Pre-DM vs control (down), , CP6_Pre-DM vs control (up), , MF1_DM vs Control (down), MF2_DM vs Controls (up) , MF3_DM vs Pre-DM (down), MF4_DM vs Pre-DM (up), MF5_Pre-DM vs control (down), MF6_Pre-DM vs control (up)]
